# Supplementary material for: Availability of evidence and comparative effectiveness for surgical versus drug interventions: an overview of systematic reviews and meta-analyses
Source: PubMed Central journal article supplement (PMC10810041; doi:10.1136/bmjopen-2023-076675), 2024-01-09
Supplement: bmjopen-2023-076675.draft_revisions.pdf [file bmjopen-2023-076675.draft_revisions.pdf]

# BMJ Open

BMJ Open is committed to open peer review. As part of this commitment we make the peer review history of every article we publish publicly available.

When an article is published we post the peer reviewers' comments and the authors' responses online. We also post the versions of the paper that were used during peer review. These are the versions that the peer review comments apply to.

The versions of the paper that follow are the versions that were submitted during the peer review process. They are not the versions of record or the final published versions. They should not be cited or distributed as the published version of this manuscript.

BMJ Open is an open access journal and the full, final, typeset and author-corrected version of record of the manuscript is available on our site with no access controls, subscription charges or pay-per-view fees (<http://bmjopen.bmj.com>).

If you have any questions on BMJ Open's open peer review process please email [info.bmjopen@bmj.com](mailto:info.bmjopen@bmj.com)

# BMJ Open

## Availability of evidence and comparative effectiveness for surgical versus drug interventions: an overview of systematic reviews

|                               |                                                                                                                                                                                                                                                                                                                                                                                                                                                                                                                                                                                                                                                                                                                                                                          |
|-------------------------------|--------------------------------------------------------------------------------------------------------------------------------------------------------------------------------------------------------------------------------------------------------------------------------------------------------------------------------------------------------------------------------------------------------------------------------------------------------------------------------------------------------------------------------------------------------------------------------------------------------------------------------------------------------------------------------------------------------------------------------------------------------------------------|
| Journal:                      | <i>BMJ Open</i>                                                                                                                                                                                                                                                                                                                                                                                                                                                                                                                                                                                                                                                                                                                                                          |
| Manuscript ID                 | bmjopen-2023-076675                                                                                                                                                                                                                                                                                                                                                                                                                                                                                                                                                                                                                                                                                                                                                      |
| Article Type:                 | Original research                                                                                                                                                                                                                                                                                                                                                                                                                                                                                                                                                                                                                                                                                                                                                        |
| Date Submitted by the Author: | 15-Jun-2023                                                                                                                                                                                                                                                                                                                                                                                                                                                                                                                                                                                                                                                                                                                                                              |
| Complete List of Authors:     | Zavalis, Emmanuel A.; Karolinska Institutet, Department of Learning Informatics Management and Ethics; Stanford University, Meta-Research Innovation Center at Stanford (METRICS)<br>Rameau, Anaïs; Weill Cornell Medical College, Sean Parker Institute for the Voice, Department of Otolaryngology–Head and Neck Surgery<br>Saraswathula, Anirudh; The Johns Hopkins University School of Medicine, Department of Otolaryngology–Head and Neck Surgery<br>Vist, Joachim; Karolinska Institutet, Department of Learning Informatics Management and Ethics<br>Schuit, Ewoud; Utrecht University, Julius Center; Utrecht University, Cochrane Denmark<br>Ioannidis, John; Stanford University; Stanford University, Meta-Research Innovation Center at Stanford (METRICS) |
| Keywords:                     | Decision Making, Systematic Review, SURGERY                                                                                                                                                                                                                                                                                                                                                                                                                                                                                                                                                                                                                                                                                                                              |
|                               |                                                                                                                                                                                                                                                                                                                                                                                                                                                                                                                                                                                                                                                                                                                                                                          |

SCHOLARONE™  
Manuscripts

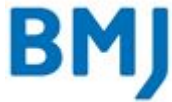

I, the Submitting Author has the right to grant and does grant on behalf of all authors of the Work (as defined in the below author licence), an exclusive licence and/or a non-exclusive licence for contributions from authors who are: i) UK Crown employees; ii) where BMJ has agreed a CC-BY licence shall apply, and/or iii) in accordance with the terms applicable for US Federal Government officers or employees acting as part of their official duties; on a worldwide, perpetual, irrevocable, royalty-free basis to BMJ Publishing Group Ltd ("BMJ") its licensees and where the relevant Journal is co-owned by BMJ to the co-owners of the Journal, to publish the Work in this journal and any other BMJ products and to exploit all rights, as set out in our [licence](#).

The Submitting Author accepts and understands that any supply made under these terms is made by BMJ to the Submitting Author unless you are acting as an employee on behalf of your employer or a postgraduate student of an affiliated institution which is paying any applicable article publishing charge ("APC") for Open Access articles. Where the Submitting Author wishes to make the Work available on an Open Access basis (and intends to pay the relevant APC), the terms of reuse of such Open Access shall be governed by a Creative Commons licence – details of these licences and which [Creative Commons](#) licence will apply to this Work are set out in our licence referred to above.

Other than as permitted in any relevant BMJ Author's Self Archiving Policies, I confirm this Work has not been accepted for publication elsewhere, is not being considered for publication elsewhere and does not duplicate material already published. I confirm all authors consent to publication of this Work and authorise the granting of this licence.

# Availability of evidence and comparative effectiveness for surgical versus drug interventions: an overview of systematic reviews

Emmanuel A. Zavalis<sup>1,2\*</sup>, Anaïs Rameau<sup>3\*</sup>, Anirudh Saraswathula<sup>4\*</sup>, Joachim Vist<sup>1</sup>, Ewoud Schuit<sup>5,6</sup>, John P. A. Ioannidis<sup>2,7</sup>

\*co-first authors

1 Department of Learning Informatics Management and Ethics, Karolinska Institutet, Stockholm, Sweden

2 Meta-Research Innovation Center at Stanford (METRICS), Stanford University, Stanford, CA, USA

3 Sean Parker Institute for the Voice, Department of Otolaryngology–Head and Neck Surgery, Weill Cornell Medical College, New York, NY, USA

4 Department of Otolaryngology–Head and Neck Surgery, Johns Hopkins University School of Medicine, Baltimore, MD, USA

5 Julius Center, University Medical Center Utrecht, Utrecht University, Utrecht, the Netherlands

6 Cochrane Netherland, University Medical Center Utrecht, Utrecht University, Utrecht, the Netherlands

7 Stanford Prevention Research Center, Department of Medicine, and Department of Epidemiology and Population Health, Stanford University School of Medicine, Stanford, CA, USA

## Corresponding author:

Emmanuel A. Zavalis

E-mail: [emmanuel.zavalis@ki.se](mailto:emmanuel.zavalis@ki.se)

**Word count:** 2883

**Publication history:** A preprint of the manuscript has been deposited in medRxiv: doi:

<https://doi.org/10.1101/2023.01.30.23285207>

## Declarations

### Ethics approval and consent to participate

Not applicable

### Consent for publication

Not applicable

### Availability of data and materials

The dataset supporting the conclusions of this article, and the used code is available in the Open Science Framework repository <https://www.doi.org/10.17605/OSF.IO/RK7HU>.

### Conflict of interest

Anaïs Rameau is a medical advisor for Perceptron Health, Inc.

### Funding

The work of John Ioannidis has been funded by an unrestricted gift from Sue and Bob O'Donnell. Anaïs Rameau is supported by a Paul B. Beeson Emerging Leaders Career Development Award in Aging (K76 AG079040) from the National Institute on Aging and by the Bridge2AI award (OT2 OD032720) from the NIH Common Fund. Anirudh Saraswathula is supported by the National Institute on Deafness and Other Communication Disorders training grant 2T32DC000027. Ewoud Schuit gratefully acknowledges financial contribution for his research by the Netherlands Organisation for Scientific Research (project 825.14.001).

### Authors' contributions

AR, AS, EAZ and JPAI developed the idea, EAZ and JPAI interpreted the review data. ES aided in the statistical analysis. All authors reviewed the manuscript and have edited and approved the submission.

### Acknowledgements

Not applicable

## Abstract

**Objectives.** To examine the prevalence of comparisons of surgery to drug regimens, the strength of evidence of such comparisons, and whether surgery or the drug intervention was favored.

**Design.** Systematic review of systematic reviews (umbrella review)

**Data sources.** Cochrane Database of Systematic Reviews (CDSR)

**Methods and analysis.** Using the search term “surg\*” in CDSR, we retrieved systematic reviews of surgical interventions. Abstracts were subsequently screened to find systematic reviews that aimed to compare surgical to drug interventions; and then, among them, those that included any randomized controlled trials (RCTs) for such comparisons. Trial results data were extracted manually and synthesized into random-effects meta-analyses.

**Results.** Overall, 188 systematic reviews intended to compare surgery versus drugs. Only 41 included data from at least one RCT (total, 165 RCTs with data) and covered a total of 103 different outcomes of various comparisons of surgery versus drugs. A GRADE assessment was performed by the Cochrane reviewers for 87 (83%) outcomes in the reviews, indicating the strength of evidence was high in 4 outcomes (4%), moderate in 22 (21%), low in 27 (26%) and very low in 33 (32%). Based on 95% confidence intervals, the surgical intervention was favored in 38/103 (37%), and the drugs were favored in 13/103 (13%) outcomes. Of the outcomes with high GRADE rating, only one showed conclusive superiority (sphincterotomy was better than medical therapy for anal fissure). Of the 22 outcomes with moderate GRADE rating, 6 (27%) were inconclusive, 14 (64%) were in favor of surgery, and 2 (9%) were in favor of drugs.

**Conclusions.** Though the relative merits of surgical versus drug interventions are important to know for many diseases, high strength randomized evidence is rare. More randomized trials comparing surgery to drug interventions are needed.

**Protocol registration.** [www.doi.org/10.17605/OSF.IO/RK7HU](http://www.doi.org/10.17605/OSF.IO/RK7HU)

### Strengths and limitations of this study

- This study is an umbrella review that examines Cochrane reviews comparing surgical to medical interventions systematically and is a start of exploring the sequestration of medical evidence.
- The full depth of the surgical Cochrane literature may not have been covered due to ongoing updates, or them not being included with our search strategy and inclusion criteria.
- The data collected and analysed in this study can be built upon further to expand our understanding of the comparative effectiveness literature, thereby mapping gaps in evidence which may need to be addressed.

## Introduction

Many diseases are treated or managed with surgery. Some may also be addressed by pharmaceutical interventions and studying the effectiveness of these different interventions is important in optimizing shared decision-making for patients and physicians. However, the amount and certainty of the evidence we hold in healthcare is limited[1], and this situation is likely worse for surgical interventions due to serious challenges in running placebo-controlled or comparative effectiveness trials[2]. Challenges to controlled trials include unique patient anatomy, operator dependent variables such as the skill or experience of the surgeon[3–5], and the difficulty of successful blinding[6]. Due to these challenges, randomized controlled trials (RCTs) in surgery are less common than in non-surgical medical specialties. Although there have been calls to strengthen the quality of the evidence in surgery[2, 7, 8], these challenges have resulted in relatively few RCTs assessing surgical interventions, particularly in comparison to medical treatments.

A summary of the existing body of evidence on surgical versus medical interventions across diseases does not exist in the literature. To synthesize this existing body of evidence is of paramount importance to evidence-based care and informed decisions in the clinic where surgery or drugs are available interventions. To find RCTs comparing surgical vs. pharmaceutical interventions, we conducted an umbrella review (an overview of systematic reviews) [9, 10] by searching the Cochrane Database of Systematic Reviews for reviews considering comparisons of surgery to drugs, analyze the strength of the evidence and evaluate results of these comparisons. Finally, we explored whether results favoring surgery were more likely to be published in the surgical literature.



## Materials and Methods

The protocol for the data collection, and analysis was pre-registered on the Open Science Framework website (doi: 10.17605/OSF.IO/RK7HU).

### *Search strategy and selection criteria*

We queried the Cochrane Database of Systematic Reviews using the term “surg\*” in “Title/Abstract/Keywords” on April 25, 2022. Inclusion criteria for reviews were consideration of RCTs and comparing a surgical to a drug intervention.

A surgical intervention was defined as a procedural technique aiming to change anatomy to treat or alleviate a pathology or symptom (including dermatological excisions). We excluded endoscopic and endovascular procedures since many of them are performed by medical rather than surgical specialists. A drug intervention was defined as a treatment that utilized a non-supplement and non-vitamin, pharmaceutical agent. Dental procedures, radiation treatment, as well as comparisons of surgery vs. no treatment or only placebo were excluded from our study. Cochrane reviews that intended to compare surgical and pharmaceutical interventions were considered even in cases where the review was unsuccessful in finding any such comparisons.

As many surgical procedures also require drug regimens (e.g., pre-operatively or as background treatment), we allowed comparisons where the surgical arm including a drug intervention was compared to a drug intervention as well. Comparisons of surgery to surgery plus drugs were not

1  
2  
3 eligible, as both arms used surgery.  
4  
5  
6

7  
8 The articles' abstracts were reviewed by EAZ, and JV who coded the reviews independently for  
9  
10 eligibility and then sought to reach a consensus. Remaining differences were mediated by JPAI.  
11  
12  
13

#### 14 15 *Main outcomes*

16  
17 The main outcomes assessed in this umbrella review were the number of Cochrane systematic  
18  
19 reviews that considered comparisons of surgical and drug interventions, and the number of  
20  
21 systematic reviews that found any eligible RCTs comparing a surgical and a drug arm. The  
22  
23 strength of evidence of the existing comparison was also treated as a main outcome, as were the  
24  
25 direction of effects in the review assessments, both in the original Cochrane analysis and our  
26  
27 standardized re-analysis).  
28  
29  
30  
31  
32

#### 33 34 *Data extraction*

35  
36 EAZ extracted data for the included systematic reviews. The included systematic reviews were  
37  
38 further classified into their corresponding surgical specialty field: cardiac surgery, dermatology,  
39  
40 general surgery, neurosurgery, obstetrics and gynaecology, ophthalmology, orthopaedic surgery,  
41  
42 otolaryngology, plastic surgery, thoracic surgery, urology and vascular surgery.  
43  
44  
45  
46

47  
48 Whenever data were available from at least one RCT comparing a surgical to a drug arm, we  
49  
50 identified the primary outcome(s) of the systematic review for the eligible comparison(s) by  
51  
52 examining the methods section of the systematic review, and classified it as either mortality,  
53  
54 composite or non-mortality. Data, in the form of contingency tables or means, standard  
55  
56  
57  
58  
59  
60

1  
2  
3 deviations and number of participants in each arms, from individual RCTs were then collected  
4  
5 from Cochrane eligible reviews. We also collected information on GRADE assessments for the  
6  
7 eligible comparisons and outcomes and the summary effect size as well as the 95% confidence  
8  
9 interval of the effect for the eligible comparison outcomes. Reviews that found no RCT of drugs  
10  
11 to surgery were tabulated as having no data.  
12  
13  
14  
15

### 16 17 *Meta-analysis*

18  
19 As Cochrane reviewers may have used different statistical models in each topic to combine the  
20  
21 results of RCTs in meta-analyses we aimed for standardization. To achieve it, we recalculated  
22  
23 the summary effect size and heterogeneity for each topic using a random effects model following  
24  
25 the Hartung-Knapp-Sidik-Jonkman approach[11, 12] so that all outcomes/topics would be  
26  
27 analyzed with the same statistical methods. The modified Haldane-Anscombe continuity  
28  
29 correction was used, i.e. when studies had no event in either the surgical or the drug arm we  
30  
31 added 0.5 to the entire contingency table of the specific study[13].  
32  
33  
34  
35  
36  
37

38 The analysis of the data was performed using R version 4.1.3 (2022-03-10), with assessment of  
39  
40 statistical significance using a threshold for  $\alpha$  of 0.005, as previously proposed[14]. The Wilson  
41  
42 approach was used for confidence intervals (99.5%) created for the primary outcomes.  
43  
44  
45  
46

### 47 *Additions to the protocol*

48  
49 The original pre-registered protocol can be found in <https://osf.io/p9x3j>. Some additions were  
50  
51 made during the process of conducting this umbrella review. For each systematic review, we  
52  
53 noted the search date to understand how old they might be. We also extracted the year of  
54  
55  
56  
57  
58  
59  
60

1  
2  
3 publication of each RCT to capture how recent the evidence was. Finally, we extracted the  
4  
5 specialty orientation of the journal, in which the RCT was published, using the categories  
6  
7 “mostly surgical”, “general”, and “mostly non-surgical”. The category “mostly surgical” includes  
8  
9 those journals that have "surgery" in their title, those that have the name of a surgical specialty in  
10  
11 their title, and those affiliated with a surgical society. The category "general" pertains to journals  
12  
13 that cover all of medicine and its specialties, surgical and non-surgical. The category "mostly  
14  
15 non-surgical" includes all the remaining journals. We assessed whether the direction of effects  
16  
17 (favoring surgery or favoring drug) was associated with the type of journal, hypothesizing that  
18  
19 RCTs published in mostly surgical journals may be more likely than other journals to favor  
20  
21  
22  
23  
24 surgery.  
25  
26  
27

### 28 **Patient and Public Involvement**

29  
30 No patients were involved in the design and conduct of this umbrella review  
31  
32  
33  
34  
35  
36  
37  
38  
39  
40  
41  
42  
43  
44  
45  
46  
47  
48  
49  
50  
51  
52  
53  
54  
55  
56  
57  
58  
59  
60

## Results

### *Search results*

The selection flowchart for Cochrane systematic reviews is represented in Figure 1. The search strategy retrieved 2495 articles from the Cochrane Database of Systematic Reviews. Among them, 440 were excluded by an automated search for withdrawn reviews and of studies with no mention of the word surgery and any of its variations in the abstract. Further manual inspection of titles and abstracts resulted in 223 Cochrane reviews being potentially eligible. Upon full-text evaluation, 35 were excluded: in 5 reviews, the surgical and drug treatments were not in separate arms and hence they were not an eligible head-to-head comparison[15–19]; in 7 reviews, there was no surgical intervention arm[20–26]; in 17 reviews, there was no drug intervention [27–32, 32–42]); 2 reviews were excluded for evaluating an endoscopic intervention [43, 44]; 3 reviews were excluded for evaluating an endovascular intervention [45–47]; and finally 1 review was excluded for being an umbrella review[48].

Therefore, 188 Cochrane reviews were found to meet the inclusion criteria (Supplemental Digital Content data file 1). Of those, 147 Cochrane reviews aimed to investigate surgical versus drug interventions but were unable to find any RCTs meeting their selection criteria. The remaining 41 reviews contained data for at least one RCT in at least one head-to-head comparison of a surgical versus a drug intervention arm (22% (99.5% CI 14 to 31%)).

The 188 reviews covered all major surgical specialties (Supplementary Table 1), with the most commonly represented specialties being general surgery (n=35), obstetrics and gynecology (n=31), ophthalmology (n=25), orthopedic surgery (n=23) and otolaryngology (n=23). No

1  
2  
3 significant difference was found across specialties in the proportion of reviews that contained  
4 data from at least one RCT for a surgery versus drug comparison (Fisher's exact  $p=0.62$ ).  
5  
6  
7  
8  
9

### 10 *Comparative treatment effect for surgery versus drug comparisons*

11  
12 The 41 eligible reviews with data included 103 comparisons of surgery versus drug treatments  
13 with data on various primary outcomes (Table 1), and they included data from a total of 165  
14 RCTs with a total of 295 primary outcome assessments. For the 165 trials, the median  
15 publication year was 2005 and the interquartile range was 1994 to 2016. The median search date  
16 year of the eligible reviews was 2016 (interquartile range, 2010 to 2022).  
17  
18  
19  
20  
21  
22  
23  
24  
25

26 Based on the 95% confidence interval of the summary estimate obtained by the Cochrane review  
27 authors, surgery was more effective in 36 of the 103 outcomes of various comparisons (35%  
28 (99.5% CI 23 to 49%)), and drugs were more effective in 15 (15% (99.5% CI 6 to 26%)). Fifty  
29 two (50% (99.5 CI% 37 to 64%)) outcomes were inconclusive. The respective numbers were  
30 1/12 (8%), 1/12 (8%), and 10/12 (83%) for mortality outcomes; 3/11 (27%), 3/11 (27%) and 5/11  
31 (46%) for composite outcomes; and 32/80 (40%), 11/80 (14%), and 37/80 (46%) for non-  
32 mortality outcomes.  
33  
34  
35  
36  
37  
38  
39  
40  
41  
42  
43

44 When we standardized the meta-analyses to use the same random effects method for all analyses,  
45 surgery was favored in 28/103 outcomes (32%), drugs were favored in 9/103 (10%) outcomes  
46 and 66/103 (58%) outcomes were inconclusive. The respective numbers were 1/12 (8%), 0/12  
47 (0%), and 11/12 (92%) for mortality outcomes; 3/11 (18%), 2/11 (27%) and 6/11 (55%) for  
48 composite outcomes; and 24/80 (30%) 7/80 (9%), and 49/80 (61%) for non-mortality outcomes.  
49  
50  
51  
52  
53  
54  
55  
56  
57  
58  
59  
60

1  
2  
3  
4  
5 Table 2 shows the topics for which the surgical intervention was found to be more effective and  
6  
7 Table 3 shows those where the drug arm was found to be more effective, all according to the  
8  
9 Cochrane authors' analysis. Supplementary Table 2 does the same for the topics for which the  
10  
11 comparisons were inconclusive.  
12  
13  
14  
15

### 16 17 *Strength of evidence according to GRADE*

18  
19 GRADE assessment of the strength of the evidence showed high rating for 4 outcomes (4%),  
20  
21 moderate for 22 (21%), low for 27 (26%), and very low for 33 (32%). No GRADE assessment  
22  
23 was performed for 17 (17%) outcomes.  
24  
25  
26  
27

28 According to GRADE assessments, only cardiac surgery, obstetrics and gynecology and general  
29  
30 surgery interventions had high GRADE ratings. Otolaryngology and dermatology had many  
31  
32 moderate ratings. Almost all other GRADE ratings were low or very low (Table 4).  
33  
34  
35  
36

37 Of the four outcomes with high GRADE rating, sphincterotomy for anal fissure showed  
38  
39 superiority over medical treatment while the other three comparisons were inconclusive. Of the  
40  
41 22 outcomes with moderate GRADE rating, 6 (27%) were inconclusive, 14 (64%) were in favor  
42  
43 of surgery, and 2 (9%) were in favor of the drug regimen according to the calculations of the  
44  
45 Cochrane authors (14 (64%), were inconclusive, 7 (32%) favored the surgical arm and 1 (5%)  
46  
47 were in favor of the drug regimen according to our standard random-effects calculations).  
48  
49  
50  
51  
52

### 53 54 *Results of RCTs according to journal of publication*

55  
56  
57

1  
2  
3 Of the 165 eligible RCTs (295 outcome assessments), 73 RCTs (133 assessments) were  
4 published in mostly surgical journals, 38 RCTs (69 assessments) in general journals, and 54  
5 RCTs (93 assessments) in mostly non-surgical journals. Based on 95% confidence intervals for  
6 the assessments of RCTs published in mostly surgical journals, 40/133 (30%) were in favor of  
7 surgery, 14/133 (11%) were in favor of drugs, and 79/133 (59%) were inconclusive. The  
8 respective numbers for the assessments of RCTs published in general journals were 27/69 (39%),  
9 5/69 (7%), and 37/69 (53%); and for the assessments of RCTs published in mostly non-surgical  
10 journals they were 22/93 (24%), 15/93 (16%), and 56 (60%), respectively. The proportion of  
11 RCTs favoring surgery was not significantly higher in mostly surgical journals (30%) compared  
12 to other journals (39% and 24% for general and non-surgical journals respectively) ( $p=0.18$  by  
13 Fisher's exact test).  
14  
15  
16  
17  
18  
19  
20  
21  
22  
23  
24  
25  
26  
27  
28  
29  
30  
31  
32  
33  
34  
35  
36  
37  
38  
39  
40  
41  
42  
43  
44  
45  
46  
47  
48  
49  
50  
51  
52  
53  
54  
55  
56  
57  
58  
59  
60



## Discussion

### *Main findings*

In a subset of Cochrane reviews that aimed to compare surgery to drugs we found that only 1 in 5 systematic reviews that had shown interest in such comparisons eventually found data from any RCTs for comparisons of the two modes of interventions. Furthermore, the majority of the comparisons where RCTs of surgery versus drugs had inconclusive results, and also had low or very low strength of the evidence on GRADE assessments. Anal fissure was the only disease in our sample that had high GRADE evidence and a direction of effect indicating that one intervention (sphincterotomy) was more effective. Consequently, in the vast majority of cases where surgical and pharmaceutical interventions are available for treatment, an evidence-based decision in the clinic is difficult. Our secondary post hoc analysis of the type of journal where the eligible RCTs were published showed that results published in surgical journals were not necessarily more prone to favor the surgical arm of an RCT over the pharmaceutical arm.

### *Strengths*

This study covers the entire Cochrane database which is considered a high-quality comprehensive collection of systematic reviews. Cochrane reviews tend to address questions typically asked in routine clinical practice and underpin many clinical guideline recommendations, making this sample all the more relevant to everyday practice [49]. Another strength of this study is that all surgical specialties were included. This is, therefore, to our knowledge the first project aiming to assess the extent of comparative evidence for surgery versus pharmacotherapy for a diverse spectrum of diseases.

### *Limitations*

Our analysis has several limitations. First, our pre-defined inclusion criteria excluded non-pharmacological medical interventions. Several comparisons may be found in the literature where surgery is compared against non-surgical non-pharmacological medical interventions, such as CPAP or radiotherapy. We also excluded endovascular and endoscopic procedures since they may be performed by surgical and medical specialists. These eligibility choices aimed to achieve some homogeneity in a project that is by definition already very heterogeneous. The use of an algorithm to filter out papers with no mention of the word surgery as well as the search strategy itself may have led to us missing reviews that discuss a particular surgical procedure but never explicitly mention the word surgery but merely the name of the intervention.

Second, we focused exclusively on RCTs, but other types of evidence, e.g., non-randomized controlled trials, or uncontrolled clinical trials may also exist and sometimes their results may be compelling enough to deem a randomized study unnecessary. Such unquestionable superiority in the absence of randomized evidence is however unlikely [50]. Efforts such as IDEAL [8] have laid out much of the groundwork for performing RCTs in surgical research, yet a dearth of RCTs in the surgical realm of research persists to this day.

Third, only one database (Cochrane Database of Systematic Reviews) was used for this study and we did not examine non-Cochrane meta-analyses published as journal articles. While the database aims to be all-inclusive, there are still some topics in medical and surgical care that have not been covered by Cochrane reviews.

1  
2  
3 Fourth, it is possible that within the same disease, subgroups of patients may be eligible only for  
4 medical or only for surgical treatment, or that one or the other approach is much better only for  
5 specific subgroups. With the dearth of evidence we found for the overall analysis, identification  
6 of such subgroup effects would be unlikely and error-prone.  
7  
8  
9  
10  
11  
12  
13

### 14 *Context of these findings*

15 Sequestration between different disciplines and specialties[51] may lead to isolation of  
16 specialists which use different tools, and this may lead to a lack of comparisons of the treatments  
17 that each specialty uses. Each specialty may have its own community, journals, meetings, and  
18 research agenda, limiting communication between different specialists even though they may be  
19 dealing with the same disease from different angles and with different therapeutic sets. This lack  
20 of communication may also be due to differences in mentorship and the trend of sub-  
21 specialization in medical training separating clinicians and their practices even further [52], or to  
22 differing incentive structures.  
23  
24  
25  
26  
27  
28  
29  
30  
31  
32  
33  
34  
35  
36  
37

38 Prior literature comparing surgical and medical interventions has assessed specific treatments,  
39 such as that for basal cell carcinoma[51], and demonstrated that sequestration was prominent.  
40 Despite a large number of trials, almost all of them compared medical interventions among  
41 themselves, or surgical interventions among themselves, rather than comparing between these  
42 two groups of treatment even though both groups of treatment could have been used. Our work  
43 shows that this issue of sequestration is widespread in surgical vs. pharmaceutical interventions.  
44  
45  
46  
47  
48  
49  
50  
51  
52  
53

### 54 **Conclusion**

1  
2  
3 This study suggests that comparisons of pharmaceutical and surgical interventions are infrequent.  
4  
5 Even accepting the difficulties in performing RCTs involving surgical interventions, our results  
6  
7 still indicate a need for more comparative effectiveness research and for improved  
8  
9 communication between surgical and medical specialties to bridge this gap in evidence. There  
10  
11 are, of course, barriers to this. Head-to-head comparisons of treatments are often disfavored by  
12  
13 manufacturers leery of jeopardizing their product against that of a competitor [53, 54], and  
14  
15 incentives unfortunately exist for both surgical and medical practitioners to promote treatments  
16  
17 they are able to offer. Moving forward, both medical and surgical professional societies should  
18  
19 collaborate to design fair and unbiased trials, and funders should also keep such research on their  
20  
21 radars to try and overcome these structural obstacles.  
22  
23  
24  
25  
26  
27

### 28 *Future research*

29  
30  
31 Future clinical research should try to expand the scope, volume, and methodological rigor of  
32  
33 comparative evidence on surgical versus medical interventions. This work should involve both  
34  
35 surgical and medical specialists and should also incorporate patient preferences. Long-term  
36  
37 patient-centered outcomes, including both benefits and harms should become available to put  
38  
39 surgical and medical practices into proper perspective.  
40  
41  
42  
43  
44  
45  
46  
47  
48  
49  
50  
51  
52  
53  
54  
55  
56  
57  
58  
59  
60

Table 1. Eligible comparisons of surgical versus medical interventions

| Surgical arm                            | Drug arm                                                    | Disease                  | Outcomes (studies/N)                                                                                                                                                                                                                     |
|-----------------------------------------|-------------------------------------------------------------|--------------------------|------------------------------------------------------------------------------------------------------------------------------------------------------------------------------------------------------------------------------------------|
| Cardiac surgery                         |                                                             |                          |                                                                                                                                                                                                                                          |
| Transmyocardial lazer revascularization | Continued medication                                        | Refractory angina        | Angina reduction (7/1053)<br>Overall mortality (7/1053)<br>Postoperative mortality (30 d) (6/967)                                                                                                                                        |
| Surgical closure                        | IV indomethacin                                             | Patent ductus arteriosus | Death before discharge (1/154)                                                                                                                                                                                                           |
| Dermatology                             |                                                             |                          |                                                                                                                                                                                                                                          |
| Surgical excision                       | Imiquimod                                                   | BCC                      | Recurrence (3 y) (1/501)<br>Recurrence (5 y) (1/501)<br>Observer-rated good/excellent cosmetic outcome (1/501)<br>Patient-rated good/excellent cosmetic outcome (1/501)                                                                  |
| Surgical excision                       | MAL-PDT                                                     | BCC                      | Recurrence (3 y) (1/68)<br>Observer-rated good/excellent cosmetic outcome (2/351)<br>Patient-rated good/excellent cosmetic outcome (2/351)                                                                                               |
| Surgical excision                       | ALA-PDT                                                     | BCC                      | Recurrence (3 y) (1/173)<br>Recurrence (5 y) (1/173)                                                                                                                                                                                     |
| General surgery                         |                                                             |                          |                                                                                                                                                                                                                                          |
| Lateral internal sphincterotomy         | Medical therapy (mainly GTN Isosorbide dinitrate and Botox) | Anal fissure             | NON-Healing (persistence or recurrence) 2 mo. (15/979)                                                                                                                                                                                   |
| Pancreatic resection                    | Chemoradiotherapy                                           | Pancreatic cancer        | Overall mortality (5 y) (2/98)                                                                                                                                                                                                           |
| Oesophagectomy                          | Chemoradiotherapy and/or radiotherapy                       | Oesophageal cancer       | Short-term mortality (5/689)<br>Long-term mortality (3/511)<br><br>Serious adverse event (3 months) (1/80)                                                                                                                               |
| Laparoscopic fundoplication             | Protein pump inhibitors                                     | GERD                     | Short-term health-related QOL (1/165)<br>Medium-term health-related QOL (1/62)<br>Health-related QOL:<br><1 y (3/605)<br>1-5 y (3/323)<br><br>GORD-specific QOL:<br><1 y (4/1160)<br>1-5 y (3/994)<br><br>Serious adverse events (2/637) |
| Surgery                                 | Tamoxifen                                                   | Primary breast cancer    | Overall survival (3/495)                                                                                                                                                                                                                 |
| Neurosurgery                            |                                                             |                          |                                                                                                                                                                                                                                          |
| Decompressive surgery                   | Prednisolone                                                | Leprosy                  | Change in motor or sensory score after one year (1/57)<br>Proportion of ulnar nerves with:<br>sensory improvement after one year (1/62), and<br>motor improvement after one year (1/62)                                                  |
| Epilepsy surgery                        | Continued antiepileptic drugs                               | Epilepsy                 | Proportion free from seizures (1 y) (2/196)<br>Proportion free from all seizures including auras (1 y) (1/80)                                                                                                                            |
| Decompressive craniectomy               | Medical treatment (including barbiturates)                  | High ICP in closed TBI   | Neurological unfavourable outcome 6 mo (3/571)<br>Mortality 6 mo (3/571)                                                                                                                                                                 |

| Surgical arm                                                        | Drug arm                                                    | Disease                                          | Outcomes (studies/N)                                                                                                                                                                                                                                                                                                                                                                                                                       |
|---------------------------------------------------------------------|-------------------------------------------------------------|--------------------------------------------------|--------------------------------------------------------------------------------------------------------------------------------------------------------------------------------------------------------------------------------------------------------------------------------------------------------------------------------------------------------------------------------------------------------------------------------------------|
| Surgical decompression                                              | Osmotic agents, blood pressure control, and glucose control | Cerebral oedema in acute ischaemic stroke        | Death at the end of follow-up (3/134)                                                                                                                                                                                                                                                                                                                                                                                                      |
| Surgical decompression                                              | Dexamethasone, antihypertensives and intermittent diuresis  | Primary supratentorial intracerebral haemorrhage | Death or dependence at end of follow up (9/1994)                                                                                                                                                                                                                                                                                                                                                                                           |
| Obstetrics and gynaecology                                          |                                                             |                                                  |                                                                                                                                                                                                                                                                                                                                                                                                                                            |
| Suction aspiration                                                  | Vaginal suppositories or im inj. of 9-methylene-PGE2        | Abortion                                         | Abortion not completed with intended method (2/472)<br>Ongoing pregnancy (2/472)<br>Pelvic infection (1/419)                                                                                                                                                                                                                                                                                                                               |
| Suction aspiration                                                  | Misoprostol                                                 | Abortion                                         | Complete miscarriage (22/5285)<br>Composite outcome of death or serious complication (9/2146)                                                                                                                                                                                                                                                                                                                                              |
| Suction aspiration                                                  | Vaginal or oral misoprostol                                 | Abortion                                         | Complete miscarriage (15/3862)<br>Surgical evacuation (13/3070)<br>Death or serious complication (5/1248)                                                                                                                                                                                                                                                                                                                                  |
| Suction aspiration                                                  | Misoprostol and mifepristone                                | Abortion                                         | Complete miscarriage (2/716)<br>Composite outcome of death or serious complication (1/618)                                                                                                                                                                                                                                                                                                                                                 |
| Dilatation and curettage                                            | Misoprostol                                                 | Abortion                                         | Complete miscarriage (1/107)<br>Composite outcome of death or serious                                                                                                                                                                                                                                                                                                                                                                      |
| Dilation and evacuation                                             | Misoprostol                                                 | Abortion                                         | Combined major and minor complications (1/94)                                                                                                                                                                                                                                                                                                                                                                                              |
| Laparoscopic ovarian drilling                                       | Medical ovulation induction                                 | Infertility due to PCOS                          | Live birth (9/1015)<br>Multiple pregnancy (14/1161)                                                                                                                                                                                                                                                                                                                                                                                        |
| Laparoscopic ovarian drilling                                       | Letrozele                                                   | Infertility due to PCOS                          | Live birth (3/548)<br>Rate of ovarian hyperstimulation syndrome (1/250)                                                                                                                                                                                                                                                                                                                                                                    |
| Laparoscopic ovarian drilling                                       | Gonadotropins                                               | PCOS                                             | Menstrual regularity at 6 mo. (1/35)<br>Improvement in androgenic symptoms 6 mo. (1/126)                                                                                                                                                                                                                                                                                                                                                   |
| Laparoscopic ovarian drilling                                       | Metformin, clomiphene                                       | PCOS                                             | Menstrual regularity at 6 mo. (2/332)                                                                                                                                                                                                                                                                                                                                                                                                      |
| Laparoscopic ovarian drilling                                       | Letrozele                                                   | PCOS                                             | Menstrual regularity at 6 mo. (1/260)                                                                                                                                                                                                                                                                                                                                                                                                      |
| Laparoscopic ovarian drilling                                       | Metformin, letrozele                                        | PCOS                                             | Menstrual regularity at 6 mo. (1/156)                                                                                                                                                                                                                                                                                                                                                                                                      |
| Laparoscopic ovarian drilling                                       | Metformin                                                   | PCOS                                             | Menstrual regularity at 6 mo. (2/236)<br>Improvement in androgenic symptoms 6 mo. (1/50)                                                                                                                                                                                                                                                                                                                                                   |
| Transcervical resection of endometrium using rollerball coagulation | Hormone therapy or antifibrinolytic                         | Heavy menstrual bleeding                         | Control of bleeding (cure or improvement to acceptable level) 4 mo. (1/186)<br>Control of bleeding (cure or improvement to acceptable level) 2 y (1/173)<br>Control of bleeding (cure or improvement to acceptable level) 5 y (1/140)<br>Overall satisfaction with treatment 4 mo. (1/186)<br>Overall satisfaction with treatment 2 y (1/173)<br>Overall satisfaction with treatment 5 y (1/141)<br><br>Adverse events at 4 months (1/186) |
| Ophthalmology                                                       |                                                             |                                                  |                                                                                                                                                                                                                                                                                                                                                                                                                                            |
| Amniotic membrane transplantation and medication                    | Lubrication, antibiotics and pressure lowering medication   | Acute ocular burns                               | Epithelial defect 21 d post-injury, and Visual acuity at final follow-up (1/68)                                                                                                                                                                                                                                                                                                                                                            |
| Laser surgery                                                       | intravitreal anti-VEGF                                      | Pathological myopia                              | Change in best corrected visual acuity (1/36)<br>Proportion of participants with a gain of 3+ lines in BCVA at 1 y (1/36)                                                                                                                                                                                                                                                                                                                  |

| <b>Surgical arm</b>                             | <b>Drug arm</b>                                                         | <b>Disease</b>                | <b>Outcomes (studies/N)</b>                                                                                                                                                                                                                                             |
|-------------------------------------------------|-------------------------------------------------------------------------|-------------------------------|-------------------------------------------------------------------------------------------------------------------------------------------------------------------------------------------------------------------------------------------------------------------------|
| iStent                                          | Latanoprost/timolol                                                     | Open angle glaucoma           | Proportion of participants who were drop-free 6-18 mo (2/285)                                                                                                                                                                                                           |
| Argon laser trabeculoplasty                     | IOP reducing medication                                                 | Open angle glaucoma           | Failure to control IOP (3/735)<br>Visual field progression (2/624)<br>Optic neuropathy progression (2/264)                                                                                                                                                              |
| Surgical correction                             | Botulinum toxin                                                         | Strabismus                    | Improved ocular alignment > 10 dioptres, children (2/102), adults (1/30)                                                                                                                                                                                                |
| Orthopaedic surgery                             |                                                                         |                               |                                                                                                                                                                                                                                                                         |
| Open section of the carpal ligament             | NSAID and splinting or corticosteroid injections                        | Carpal tunnel syndrome        | Improvement in clinical symptoms at three months of follow-up (2/245)                                                                                                                                                                                                   |
| Open surgery                                    | Corticosteroid injection                                                | Trigger finger                | Resolution of triggering (2/270)                                                                                                                                                                                                                                        |
| Decompressive surgery with or without fusion    | Epidural steroid injection                                              | Lumbar spinal stenosis        | Oswestry Disability index 6 w (1/38)<br>Pain intensity (VAS) 6 w (1/38)<br>Zurich claudication questionnaire (symptom evaluation) 6 w (1/38)                                                                                                                            |
| Open unilateral sympathectomy (L2-4)            | IV prostanoid iloprost                                                  | Critical limb ischaemia       | Complete ulcer healing w/o rest pain or major amputation (24 w) (1/162)                                                                                                                                                                                                 |
| Surgical rotator cuff repair                    | Non-operative treatment including corticosteroid injection and exercise | Rotator cuff tear             | Pain (VAS) 12 mo (1/56)                                                                                                                                                                                                                                                 |
| Arthroscopic surgery                            | Sclerosing injection                                                    | Jumper's knee                 | Knee pain (0-100, 12 mo.) (1/50)<br>Participant global assessment of success (1-100, 12 mo.) (1/50)<br>Withdrawal rate (1/52)                                                                                                                                           |
| Otolaryngology                                  |                                                                         |                               |                                                                                                                                                                                                                                                                         |
| Surgical orbital decompression                  | IV Methylprednisolone 1x3 followed by oral prednisolone                 | Thyroid eye disease           | Proportion of successes compared to the proportion of treatment failures as defined by the study authors based on the use of composite outcome scores (1/15)                                                                                                            |
| Grommets (ventilation tubes)                    | Antibiotic prophylaxis                                                  | Recurrent acute otitis media  | Proportion of patients who have no AOM recurrences (6 mo.) (2/96)                                                                                                                                                                                                       |
| Tonsillectomy or adenotonsillectomy             | Watchful waiting with or without analgesics and antibiotics             | Tonsillitis                   | Episodes of sore throat of any severity (children) (5/795)<br>Episodes of moderately or severely sore throat (children) (4/564)<br>Sore throat days (children) (5/776)<br>Episodes of sore throat of any severity (adults) (2/156)<br>Sore throat days (adults) (2/156) |
| Thoracic surgery                                |                                                                         |                               |                                                                                                                                                                                                                                                                         |
| Open thoracotomy                                | Thoracostomy drainage (with fibrinolytics)                              | Pleural empyema               | Mortality (1/30)                                                                                                                                                                                                                                                        |
| VATS                                            | Thoracostomy drainage (with fibrinolytics)                              | Pleural empyema               | Mortality (7/367)                                                                                                                                                                                                                                                       |
| Urology                                         |                                                                         |                               |                                                                                                                                                                                                                                                                         |
| Surgical reimplantation of ureters              | Antibiotics                                                             | Primary vesicoureteric reflux | Rate of patients with symptomatic UTI (1/297)                                                                                                                                                                                                                           |
| Vascular surgery                                |                                                                         |                               |                                                                                                                                                                                                                                                                         |
| Carotid endarterectomy and Aspirin 325 mg daily | Aspirin 325 mg daily                                                    | Asymptomatic carotid stenosis | Perioperative stroke or death, or stroke of any territory or type during follow up (2/2103)                                                                                                                                                                             |
| Aspirin and carotid surgery                     | Aspirin                                                                 | Carotid stenosis              | Any stroke or operative death (3/6090)<br>Ipsilateral ischaemic stroke, and any operative stroke or death near occlusion (3/6090)                                                                                                                                       |
| Saphenofemoral disconnection                    | Therapeutic LMWH                                                        | Superficial thrombophlebitis  | Symptomatic VTE (1/60)<br>Major bleeding (1/60)                                                                                                                                                                                                                         |

1  
2  
3  
4  
5  
6

| <b>Surgical arm</b>                  | <b>Drug arm</b>                      | <b>Disease</b>       | <b>Outcomes (studies/N)</b> |
|--------------------------------------|--------------------------------------|----------------------|-----------------------------|
| Surgery including primary amputation | Thrombolysis (w/ rt-Pa or urokinase) | Acute limb ischaemia | Limb salvage (30 d) (3/841) |

7  
8

*Abbreviations*

9  
10

BCC: basal cell carcinoma of the skin

11  
12

GERD: Gastro-oesophageal reflux disease

13  
14

GTN: glyceryl tri-nitrate

15  
16

IOP: intra-ocular pressure

17  
18

PCOS: polycystic ovarian syndrome

19  
20

QOL: Quality of life

21  
22  
23  
24  
25  
26  
27  
28  
29  
30  
31  
32  
33  
34  
35  
36  
37  
38  
39  
40  
41  
42  
43  
44  
45  
46  
47  
48  
49  
50  
51  
52  
53  
54  
55  
56  
57  
58  
59  
60

For peer review only



Table 2. Comparisons where the surgical treatment was superior to the drug treatment

| Surgical arm                            | Drug arm                                                    | Disease                                          | Outcome                                             | Treatment effect (95% CI) | GRADE assessment |
|-----------------------------------------|-------------------------------------------------------------|--------------------------------------------------|-----------------------------------------------------|---------------------------|------------------|
| Cardiac surgery                         |                                                             |                                                  |                                                     |                           |                  |
| Transmyocardial laser revascularization | Continued medication                                        | Refractory angina                                | Angina reduction                                    | OR=4.63 (3.43-6.25)       | Low              |
| Dermatology                             |                                                             |                                                  |                                                     |                           |                  |
| Surgical excision                       | Imiquimod                                                   | BCC                                              | Recurrence (3 y)                                    | RR=0.1 (0.03-0.31)        | Moderate         |
|                                         |                                                             |                                                  | Recurrence (5 y)                                    | RR=0.13 (0.05-0.36)       | Moderate         |
| Surgical excision                       | MAL-PDT                                                     | BCC                                              | Recurrence (3 y)                                    | RR=0.04 (0-0.61)          | Low              |
| Surgical excision                       | ALA-PDT                                                     | BCC                                              | Recurrence (3 y)                                    | RR=0.09 (0.02-0.38)       | Moderate         |
|                                         |                                                             |                                                  | Recurrence (5 y)                                    | RR=0.08 (0.02-0.34)       | Moderate         |
| General surgery                         |                                                             |                                                  |                                                     |                           |                  |
| Laparoscopic fundoplication             | Protein pump inhibitors                                     | GERD                                             | GORD-specific QOL (<1 y)                            | SMD=0.58 (0.46-0.7)       | Low              |
| Lateral internal sphincterotomy         | Medical therapy (mainly GTN and Botox)                      | Anal fissure                                     | Non-Healing (persistence or recurrence) 2 mo.       | OR=0.11 (0.06-0.23)       | High             |
| Neurosurgery                            |                                                             |                                                  |                                                     |                           |                  |
| Epilepsy surgery                        | Continued antiepileptic drugs                               | Epilepsy                                         | Proportion (%) free from seizures (1 y)             | RR=9.78 (4.73-20.2)*      | Low              |
|                                         |                                                             |                                                  | Proportion free from all seizures incl. auras (1 y) | RR=15 (2.08-108.23)       | Very Low         |
| Surgical decompression                  | Osmotic agents, blood pressure control, and glucose control | Cerebral oedema in acute ischaemic stroke        | Death at the end of follow-up                       | OR=0.19 (0.09-0.37)       |                  |
| Surgical decompression                  | Dexamethasone, antihypertensives and intermittent diuresis  | Primary supratentorial intracerebral haemorrhage | Death or dependence at end of follow up             | OR=0.71 (0.58-0.88)       |                  |
| Obstetrics and gynaecology              |                                                             |                                                  |                                                     |                           |                  |
| Suction aspiration                      | Misoprostol                                                 | Abortion                                         | Complete miscarriage                                | RR=1.11 (1.06-1.17)       | Very Low         |
|                                         |                                                             |                                                  | Complete miscarriage                                | RR=1.04 (1.02-1.06)       | Very Low         |
| Dilatation and curettage                | Misoprostol                                                 | Abortion                                         | Complete miscarriage                                | RR=1.18 (1.1-1.27)*       | Very Low         |
| Dilatation and evacuation               | Misoprostol                                                 | Abortion                                         | Combined major and minor complications              | OR=0.12 (0.03-0.46)       |                  |
| Laparoscopic ovarian drilling           | Medical ovulation induction                                 | Infertility due to PCOS                          | Multiple pregnancy                                  | OR=0.34 (0.18-0.66)       | Moderate         |

| Surgical arm                                                        | Drug arm                                                    | Disease                      | Outcome                                                             | Treatment effect (95% CI)  | GRADE assessment |
|---------------------------------------------------------------------|-------------------------------------------------------------|------------------------------|---------------------------------------------------------------------|----------------------------|------------------|
| Laparoscopic ovarian drilling                                       | Gonadotropins                                               | PCOS                         | Menstrual regularity at 6 mo.                                       | OR=19.2 (3.17-116)         | Very Low         |
| Transcervical resection of endometrium using rollerball coagulation | Hormone therapy or antifibrinolytic                         | Heavy menstrual bleeding     | Control of bleeding (cure or improvement to acceptable level) 4 mo. | RR=2.66 (1.94-3.64)        | Moderate         |
|                                                                     |                                                             |                              | Control of bleeding (cure or improvement to acceptable level) 2 y   | RR=1.29 (1.06-1.57)        | Low              |
|                                                                     |                                                             |                              | Overall satisfaction with treatment 4 mo.                           | RR=2.8 (1.96-3.99)         | Moderate         |
|                                                                     |                                                             |                              | Overall satisfaction with treatment 2 y                             | RR=1.4 (1.13-1.74)         | Moderate         |
|                                                                     |                                                             |                              | Adverse events at 4 months                                          | RR=0.26 (0.15-0.46)        | Moderate         |
| Ophthalmology                                                       |                                                             |                              |                                                                     |                            |                  |
| Surgical correction                                                 | Botulinum toxin                                             | Strabismus                   | Improved ocular alignment > 10 dioptres, adults                     | RR=2.63 (1.18-5.9)         | Low              |
| iStent                                                              | Latanoprost/timolol                                         | Open angle glaucoma          | Proportion of participants who were drop-free 6-18 mo               | RR=125 (17.8-884)          | Very low         |
| Argon laser trabeculoplasty                                         | IOP reducing medication                                     | Open angle glaucoma          | Failure to control IOP                                              | RR=0.8 (0.71-0.91)         |                  |
| Orthopaedic surgery                                                 |                                                             |                              |                                                                     |                            |                  |
| Arthroscopic surgery                                                | Sclerosing injection                                        | Jumper's knee                | Knee pain (0-100, 12 mo.)                                           | MD=-28.3 (-41.79- -14.81)  | Low              |
|                                                                     |                                                             |                              | Participant global assessment of success (1-100, 12 mo.)            | MD=33.9 (18.74-49.06)      | Low              |
| Decompressive surgery with or without fusion                        | Epidural steroid injection                                  | Lumbar spinal stenosis       | Zurich claudication questionnaire (symptom evaluation) 6 w          | MD=-0.6 (-0.77- -0.43)     | Low              |
| Open unilateral sympathectomy (L2-4)                                | IV prostanoid iloprost                                      |                              | Complete ulcer healing w/o rest pain or major amputation (24 w)     | RR=1.76 (1.35-2.29)        | Low              |
| Otolaryngology                                                      |                                                             |                              |                                                                     |                            |                  |
| Grommets (ventilation tubes)                                        | Antibiotic prophylaxis                                      | Recurrent acute otitis media | Proportion of patients who have no recurrences (6 mo.)              | RR=1.68 (1.07-2.65)*       | Very Low         |
| Tonsillectomy or adenotonsillectomy                                 | Watchful waiting with or without analgesics and antibiotics | Tonsillitis                  | Episodes of sore throat of any severity (children)                  | MD=-0.56 (-1.04- -0.07)*   | Moderate         |
|                                                                     |                                                             |                              | Sore throat days (children)                                         | MD=-5.13 (-8.03- -2.2)*    | Moderate         |
|                                                                     |                                                             |                              | Episodes of sore throat of any severity (adults)                    | -MD=3.61 (-7.92- -0.7)*    | Moderate         |
|                                                                     |                                                             |                              | Sore throat days (adults)                                           | MD=-10.64 (-15.52- -5.76)* | Moderate         |

| Surgical arm                | Drug arm | Disease          | Outcome                       | Treatment effect (95% CI) | GRADE assessment |
|-----------------------------|----------|------------------|-------------------------------|---------------------------|------------------|
| Vascular surgery            |          |                  |                               |                           |                  |
| Aspirin and carotid surgery | Aspirin  | Carotid stenosis | Any stroke or operative death | RR=0.85 (0.77-0.95)*      | Moderate         |

\*our re-analysis using a random effects meta-analysis model shows that the 95% confidence interval includes the null (results are inconclusive)

RR: risk ratio

OR: odds ratio

HR: hazard ratio

MD: mean difference

SMD: standardized mean difference

BCC: basal cell carcinoma of the skin

GERD: Gastro-oesophageal reflux disease

GNT: glyceryl trinitrate

IOP: intra-ocular pressure

PCOS: polycystic ovarian syndrome

QOL: Quality of life

Table 3. Comparisons where the drug treatment was superior to the surgical treatment

| Surgical arm                                     | Drug arm                                                    | Disease                       | Outcome                                                                            | Treatment effect (95% CI) | GRADE assessment |
|--------------------------------------------------|-------------------------------------------------------------|-------------------------------|------------------------------------------------------------------------------------|---------------------------|------------------|
| Dermatology                                      |                                                             |                               |                                                                                    |                           |                  |
| Surgical excision                                | Imiquimod                                                   | BCC                           | Observer-rated good/excellent cosmetic outcome                                     | RR=0.59 (0.47-0.74)       | Low              |
| Surgical excision                                | MAL-PDT                                                     | BCC                           | Observer-rated good/excellent cosmetic outcome                                     | RR=0.85 (0.79-0.92)*      | Moderate         |
| Surgical excision                                | MAL-PDT                                                     | BCC                           | Patient-rated good/excellent cosmetic outcome                                      | RR=0.53 (0.44-0.65)*      | Moderate         |
| General surgery                                  |                                                             |                               |                                                                                    |                           |                  |
| Oesophagectomy                                   | Chemoradiotherapy and/or radiotherapy                       | Oesophageal cancer            | Serious adverse event (3 months)                                                   | RR=1.73 (1.11-2.67)*      | Very Low         |
|                                                  |                                                             |                               | Short-term health-related QOL                                                      | MD=0.93 (0.24-1.62)       | Very Low         |
| Laparoscopic fundoplication                      | Protein pump inhibitors                                     | GERD                          | Serious adverse events                                                             | RR=1.46 (1.01-2.11)       | Very Low         |
| Pancreatic resection                             | Chemoradiotherapy                                           | Pancreatic cancer             | Overall mortality (5 y)                                                            | HR=2.63 (1.72-4)*         | Very Low         |
| Obstetrics and gynaecology                       |                                                             |                               |                                                                                    |                           |                  |
| Laparoscopic ovarian drilling                    | Medical ovulation induction                                 | Infertility due to PCOS       | Live birth                                                                         | OR=0.71 (0.54-0.92)       | Low              |
| Suction aspiration                               | Vaginal or oral misoprostol                                 | Abortion                      | Surgical evacuation                                                                | RR=20 (9.1-50)            | Very Low         |
| Ophthalmology                                    |                                                             |                               |                                                                                    |                           |                  |
| Laser surgery                                    | intravitreal anti-VEGF                                      | Pathological myopia           | Change in best corrected visual acuity                                             | MD=0.22 (0.01-0.43)*      | Low              |
| Amniotic membrane transplantation and medication | Lubrication, Antibiotics and Pressure lowering medication   | Acute ocular burns            | Visual acuity at final follow-up                                                   | MD=-0.83 (-1.32- -0.34)   | Very Low         |
| Orthopaedic surgery                              |                                                             |                               |                                                                                    |                           |                  |
| Decompressive surgery with or without fusion     | Epidural steroid injection                                  | Lumbar spinal stenosis        | Oswestry Disability index 6 w                                                      | MD=5.7 (0.57-10.83)       | Low              |
|                                                  |                                                             |                               | Pain intensity (VAS) 6 w                                                           | MD=2.4 (1.92-2.88)        | Low              |
| Otolaryngology                                   |                                                             |                               |                                                                                    |                           |                  |
| Tonsillectomy or adenotonsillectomy              | Watchful waiting with or without analgesics and antibiotics | Tonsillitis                   | Episodes of moderately or severely sore throat (children)                          | MD=0.62 (0.22-1.03)*      | Low              |
| Vascular surgery                                 |                                                             |                               |                                                                                    |                           |                  |
| Carotid endarterectomy and Aspirin 325 mg daily  | Aspirin 325 mg daily                                        | Asymptomatic carotid stenosis | Perioperative stroke or death, or stroke of any territory or type during follow up | RR=6.49 (2.53-16.61)      |                  |

1  
2  
3 \*our re-analysis using a random effects meta-analysis model shows that the 95% confidence  
4 interval includes the null (results are inconclusive)  
5

6 RR: risk ratio

7 OR: odds ratio

8 HR: hazard ratio

9 MD: mean difference

10 BCC: basal cell carcinoma of the skin

11 GERD: Gastro-oesophageal reflux disease

12 PCOS: polycystic ovarian syndrome  
13  
14  
15  
16  
17  
18  
19  
20  
21  
22  
23  
24  
25  
26  
27  
28  
29  
30  
31  
32  
33  
34  
35  
36  
37  
38  
39  
40  
41  
42  
43  
44  
45  
46  
47  
48  
49  
50  
51  
52  
53  
54  
55  
56  
57  
58  
59  
60

For peer review only

Table 4. GRADE assessment across specialties

| <b>Specialty</b>          | <b>Very Low</b> | <b>Low</b> | <b>Moderate</b> | <b>High</b> | <b>None available</b> |
|---------------------------|-----------------|------------|-----------------|-------------|-----------------------|
| Cardiac surgery           | 0 (0)           | 1 (25)     | 0 (0)           | 2 (50)      | 1 (25)                |
| Dermatology               | 0 (0)           | 3 (33)     | 6 (67)          | 0 (0)       | 0 (0)                 |
| General surgery           | 9 (69)          | 3 (23)     | 0 (0)           | 1 (8)       | 0 (0)                 |
| Neurosurgery              | 5 (50)          | 2 (20)     | 1 (10)          | 0 (0)       | 2 (20)                |
| Obstetrics and gynecology | 14 (45)         | 4 (13)     | 7 (23)          | 1 (3)       | 5 (16)                |
| Ophthalmology             | 2 (20)          | 5 (50)     | 0 (0)           | 0 (0)       | 3 (30)                |
| Orthopaedic surgery       | 2 (20)          | 6 (60)     | 1 (10)          | 0 (0)       | 1 (10)                |
| Otolaryngology            | 1 (14)          | 1 (14)     | 4 (57)          | 0 (0)       | 1 (14)                |
| Thoracic surgery          | 0 (0)           | 1 (50)     | 1 (50)          | 0 (0)       | 0 (0)                 |
| Urology                   | 0 (0)           | 0 (0)      | 0 (0)           | 0 (0)       | 1 (100)               |
| Vascular surgery          | 0 (0)           | 1 (17)     | 2 (33)          | 0 (0)       | 3 (50)                |

## References

1. Howick J, Koletsi D, Ioannidis JPA, Madigan C, Pandis N, Loef M, et al. Most healthcare interventions tested in Cochrane Reviews are not effective according to high quality evidence: a systematic review and meta-analysis. *J Clin Epidemiol.* 2022;:S0895-4356(22)00100-7.
2. Ergina PL, Cook JA, Blazeby JM, Boutron I, Clavien P-A, Reeves BC, et al. Challenges in evaluating surgical innovation. *The Lancet.* 2009;374:1097–104.
3. Maruthappu M, Gilbert BJ, El-Harasis MA, Nagendran M, McCulloch P, Duclos A, et al. The influence of volume and experience on individual surgical performance: a systematic review. *Ann Surg.* 2015;261:642–7.
4. Martling A, Cedermark B, Johansson H, Rutqvist LE, Holm T. The surgeon as a prognostic factor after the introduction of total mesorectal excision in the treatment of rectal cancer. *British Journal of Surgery.* 2002;89:1008–13.
5. McGrath PD. Relation Between Operator and Hospital Volume and Outcomes Following Percutaneous Coronary Interventions in the Era of the Coronary Stent. *JAMA.* 2000;284:3139.
6. Gelijns AC, Ascheim DD, Parides MK, Kent KC, Moskowitz AJ. Randomized trials in surgery. *Surgery.* 2009;145:581–7.
7. Barkun JS, Aronson JK, Feldman LS, Maddern GJ, Strasberg SM, Balliol Collaboration, et al. Evaluation and stages of surgical innovations. *Lancet.* 2009;374:1089–96.
8. McCulloch P, Altman DG, Campbell WB, Flum DR, Glasziou P, Marshall JC, et al. No surgical innovation without evaluation: the IDEAL recommendations. *Lancet.* 2009;374:1105–12.
9. Janiaud P, Agarwal A, Tzoulaki I, Theodoratou E, Tsilidis KK, Evangelou E, et al. Validity of observational evidence on putative risk and protective factors: appraisal of 3744 meta-analyses on 57 topics. *BMC Med.* 2021;19:157.
10. Belbasis L, Bellou V, Ioannidis JPA. Conducting umbrella reviews. *bmjmed.* 2022;1:e000071.
11. Hartung J, Knapp G. A refined method for the meta-analysis of controlled clinical trials with binary outcome. *Stat Med.* 2001;20:3875–89.
12. IntHout J, Ioannidis JPA, Borm GF. The Hartung-Knapp-Sidik-Jonkman method for random effects meta-analysis is straightforward and considerably outperforms the standard DerSimonian-Laird method. *BMC Med Res Methodol.* 2014;14:25.
13. Weber F, Knapp G, Ickstadt K, Kundt G, Glass Ä. Zero-cell corrections in random-effects meta-analyses. *Res Syn Meth.* 2020;11:913–9.
14. Ioannidis JPA. The Proposal to Lower *P* Value Thresholds to .005. *JAMA.* 2018;319:1429.

- 1  
2  
3 15. Phelps PO, Abariga SA, Cowling BJ, Selva D, Marcet MM. Antimetabolites as an adjunct to  
4 dacryocystorhinostomy for nasolacrimal duct obstruction. *Cochrane Database Syst Rev.*  
5 2020;4:CD012309.  
6  
7  
8 16. Rees K, Beranek-Stanley M, Burke M, Ebrahim S. Hypothermia to reduce neurological  
9 damage following coronary artery bypass surgery. *Cochrane Database Syst Rev.*  
10 2001;:CD002138.  
11  
12 17. Hoare BJ, Wallen MA, Imms C, Villanueva E, Rawicki HB, Carey L. Botulinum toxin A as  
13 an adjunct to treatment in the management of the upper limb in children with spastic cerebral  
14 palsy (UPDATE). *Cochrane Database Syst Rev.* 2010;2010:CD003469.  
15  
16 18. Shylasree TS, Bryant A, Howells RE. Chemoradiation for advanced primary vulval cancer.  
17 *Cochrane Database Syst Rev.* 2011;2011:CD003752.  
18  
19  
20 19. Lansbury L, Leonardi-Bee J, Perkins W, Goodacre T, Tweed JA, Bath-Hextall FJ.  
21 Interventions for non-metastatic squamous cell carcinoma of the skin. *Cochrane Database Syst*  
22 *Rev.* 2010;:CD007869.  
23  
24 20. Moreno G, Corbalán J, Peñaloza B, Pantoja T. Topical corticosteroids for treating phimosis  
25 in boys. *Cochrane Database Syst Rev.* 2014;:CD008973.  
26  
27  
28 21. Mitra S, Scrivens A, von Kursell AM, Disher T. Early treatment versus expectant  
29 management of hemodynamically significant patent ductus arteriosus for preterm infants.  
30 *Cochrane Database Syst Rev.* 2020;12:CD013278.  
31  
32 22. Flower A, Liu JP, Lewith G, Little P, Li Q. Chinese herbal medicine for endometriosis.  
33 *Cochrane Database Syst Rev.* 2012;:CD006568.  
34  
35 23. Görk AS, Ehrenkranz RA, Bracken MB. Continuous infusion versus intermittent bolus doses  
36 of indomethacin for patent ductus arteriosus closure in symptomatic preterm infants. *Cochrane*  
37 *Database Syst Rev.* 2008;2008:CD006071.  
38  
39  
40 24. Zhao J-G, Wang J, Huang W-J, Zhang P, Ding N, Shang J. Interventions for treating simple  
41 bone cysts in the long bones of children. *Cochrane Database Syst Rev.* 2017;2:CD010847.  
42  
43 25. Bettany-Saltikov J, Weiss H-R, Chockalingam N, Taranu R, Srinivas S, Hogg J, et al.  
44 Surgical versus non-surgical interventions in people with adolescent idiopathic scoliosis.  
45 *Cochrane Database Syst Rev.* 2015;:CD010663.  
46  
47 26. Kang D, Han J, Neuberger MM, Moy ML, Wallace SA, Alonso-Coello P, et al. Transurethral  
48 radiofrequency collagen denaturation for the treatment of women with urinary incontinence.  
49 *Cochrane Database Syst Rev.* 2015;:CD010217.  
50  
51  
52 27. Colquitt JL, Pickett K, Loveman E, Frampton GK. Surgery for weight loss in adults.  
53 *Cochrane Database Syst Rev.* 2014;:CD003641.  
54  
55  
56  
57  
58  
59  
60



- 1  
2  
3 28. Palmer JS, Monk AP, Hopewell S, Bayliss LE, Jackson W, Beard DJ, et al. Surgical  
4 interventions for symptomatic mild to moderate knee osteoarthritis. *Cochrane Database Syst*  
5 *Rev.* 2019;7:CD012128.  
6  
7 29. Laupattarakasem W, Laopaiboon M, Laupattarakasem P, Sumananont C. Arthroscopic  
8 debridement for knee osteoarthritis. *Cochrane Database Syst Rev.* 2008;:CD005118.  
9  
10 30. Liu JP, Yang H, Xia Y, Cardini F. Herbal preparations for uterine fibroids. *Cochrane*  
11 *Database Syst Rev.* 2013;:CD005292.  
12  
13 31. Cirocchi R, Trastulli S, Pressi E, Farinella E, Avenia S, Morales Uribe CH, et al. Non-  
14 operative management versus operative management in high-grade blunt hepatic injury.  
15 *Cochrane Database Syst Rev.* 2015;2015:CD010989.  
16  
17 32. Page MJ, Massy-Westropp N, O'Connor D, Pitt V. Splinting for carpal tunnel syndrome.  
18 *Cochrane Database Syst Rev.* 2012;2012:CD010003.  
19  
20 33. Nikolaidis I, Fouyas IP, Sandercock PA, Statham PF. Surgery for cervical radiculopathy or  
21 myelopathy. *Cochrane Database Syst Rev.* 2010;2010:CD001466.  
22  
23 34. Cheuk DKL, Wong V, Wraige E, Baxter P, Cole A. Surgery for scoliosis in Duchenne  
24 muscular dystrophy. *Cochrane Database Syst Rev.* 2015;2015:CD005375.  
25  
26 35. Weitz M, Portz S, Laube GF, Meerpohl JJ, Bassler D. Surgery versus non-surgical  
27 management for unilateral ureteric-pelvic junction obstruction in newborns and infants less than  
28 two years of age. *Cochrane Database Syst Rev.* 2016;7:CD010716.  
29  
30 36. Abraham A, Kumar S, Chaudhry S, Ibrahim T. Surgical interventions for diaphyseal  
31 fractures of the radius and ulna in children. *Cochrane Database Syst Rev.* 2011;:CD007907.  
32  
33 37. Chang MY, Coleman AL, Tseng VL, Demer JL. Surgical interventions for vertical  
34 strabismus in superior oblique palsy. *Cochrane Database Syst Rev.* 2017;2017:CD012447.  
35  
36 38. Monk AP, Davies LJ, Hopewell S, Harris K, Beard DJ, Price AJ. Surgical versus  
37 conservative interventions for treating anterior cruciate ligament injuries. *Cochrane Database*  
38 *Syst Rev.* 2016;4:CD011166.  
39  
40 39. Gosler MW, Testroote M, Morrenhof JW, Janzing HMJ. Surgical versus non-surgical  
41 interventions for treating humeral shaft fractures in adults. *Cochrane Database Syst Rev.*  
42 *2012;1:CD008832.*  
43  
44 40. Smith TO, Donell S, Song F, Hing CB. Surgical versus non-surgical interventions for  
45 treating patellar dislocation. *Cochrane Database Syst Rev.* 2015;:CD008106.  
46  
47 41. Abudou M, Chen X, Kong X, Wu T. Surgical versus non-surgical treatment for  
48 thoracolumbar burst fractures without neurological deficit. *Cochrane Database Syst Rev.*  
49 *2013;:CD005079.*  
50  
51  
52  
53  
54  
55  
56  
57  
58  
59  
60

- 1  
2  
3 42. Cataneo AJM, Cataneo DC, de Oliveira FHS, Arruda KA, El Dib R, de Oliveira Carvalho  
4 PE. Surgical versus nonsurgical interventions for flail chest. *Cochrane Database Syst Rev.*  
5 2015;2015:CD009919.  
6  
7  
8 43. Khalil HS, Nunez DA. Functional endoscopic sinus surgery for chronic rhinosinusitis.  
9 *Cochrane Database Syst Rev.* 2006;:CD004458.  
10  
11 44. Tóth M, Shah A, Hu K, Bunce C, Gazzard G. Endoscopic cyclophotocoagulation (ECP) for  
12 open angle glaucoma and primary angle closure. *Cochrane Database Syst Rev.*  
13 2019;2:CD012741.  
14  
15 45. Fakhry F, Fokkenrood HJ, Spronk S, Teijink JA, Rouwet EV, Hunink MGM. Endovascular  
16 revascularisation versus conservative management for intermittent claudication. *Cochrane*  
17 *Database Syst Rev.* 2018;3:CD010512.  
18  
19 46. Araujo ST, Moreno DH, Cacione DG. Percutaneous thrombectomy or ultrasound-accelerated  
20 thrombolysis for initial management of acute limb ischaemia. *Cochrane Database Syst Rev.*  
21 2022;1:CD013486.  
22  
23 47. Jenks S, Yeoh SE, Conway BR. Balloon angioplasty, with and without stenting, versus  
24 medical therapy for hypertensive patients with renal artery stenosis. *Cochrane Database Syst*  
25 *Rev.* 2014;2014:CD002944.  
26  
27 48. O'Connell NE, Wand BM, McAuley J, Marston L, Moseley GL. Interventions for treating  
28 pain and disability in adults with complex regional pain syndrome. *Cochrane Database Syst Rev.*  
29 2013;2013:CD009416.  
30  
31 49. Korfitsen CB, Mikkelsen M-LK, Ussing A, Walker KC, Rohde JF, Andersen HK, et al.  
32 Usefulness of Cochrane Reviews in Clinical Guideline Development-A Survey of 585  
33 Recommendations. *Int J Environ Res Public Health.* 2022;19:685.  
34  
35 50. Hozo I, Djulbegovic B, Parish AJ, Ioannidis JPA. Identification of threshold for large  
36 (dramatic) effects that would obviate randomized trials is not possible. *Journal of Clinical*  
37 *Epidemiology.* 2022;145:101–11.  
38  
39 51. Kim DD, Tang JY, Ioannidis JPA. Network geometry shows evidence sequestration for  
40 medical vs. surgical practices: treatments for basal cell carcinoma. *Journal of Clinical*  
41 *Epidemiology.* 2014;67:391–400.  
42  
43 52. Hirshman BR, Tang JA, Jones LA, Proudfoot JA, Carley KM, Marshall L, et al. Impact of  
44 medical academic genealogy on publication patterns: An analysis of the literature for surgical  
45 resection in brain tumor patients: Medical Academic Genealogy. *Ann Neurol.* 2016;79:169–77.  
46  
47 53. Flacco ME, Manzoli L, Boccia S, Capasso L, Aleksovska K, Rosso A, et al. Head-to-head  
48 randomized trials are mostly industry sponsored and almost always favor the industry sponsor.  
49 *Journal of Clinical Epidemiology.* 2015;68:811–20.  
50  
51  
52  
53  
54  
55  
56  
57  
58  
59  
60

1  
2  
3 54. Lathyris DN, Patsopoulos NA, Salanti G, Ioannidis JPA. Industry sponsorship and selection  
4 of comparators in randomized clinical trials. *European Journal of Clinical Investigation*.  
5 2010;40:172–82.  
6  
7  
8  
9  
10  
11  
12  
13  
14  
15  
16  
17  
18  
19  
20  
21  
22  
23  
24  
25  
26  
27  
28  
29  
30  
31  
32  
33  
34  
35  
36  
37  
38  
39  
40  
41  
42  
43  
44  
45  
46  
47  
48  
49  
50  
51  
52  
53  
54  
55  
56  
57  
58  
59  
60

For peer review only

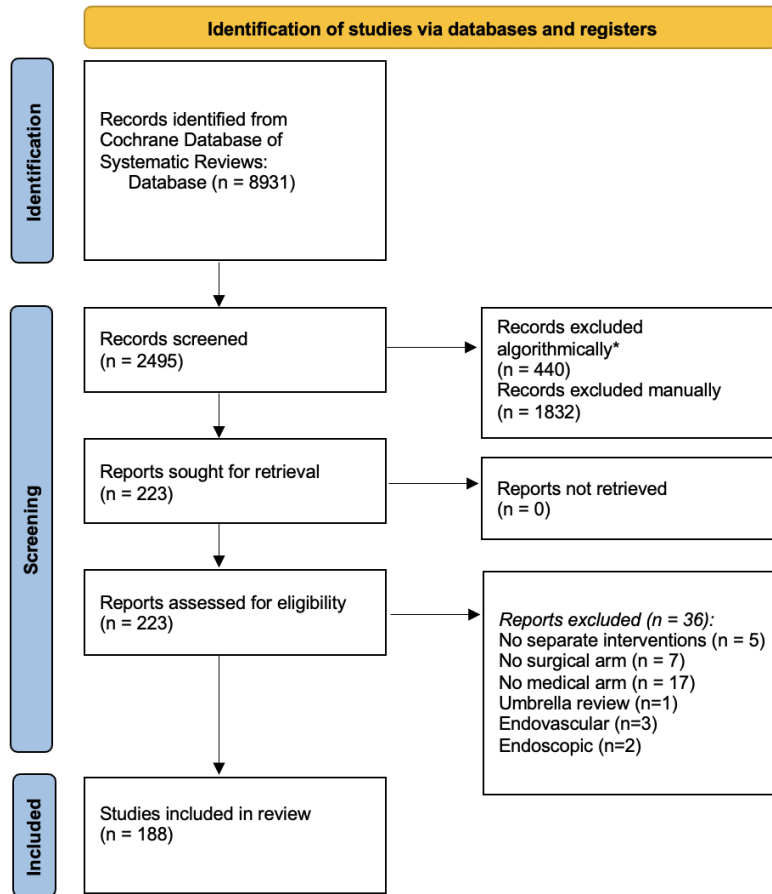

\*Searched title and abstract for withdrawals, and for abstracts without the word surgery or any of its variations to exclude them

Figure 1

253x255mm (118 x 118 DPI)

1  
2  
3 **Availability of evidence and comparative effectiveness for surgical versus drug interventions: an**  
4 **overview of systematic reviews**  
5

6 Emmanuel A. Zavalis<sup>1,2\*</sup>, Anaïs Rameau<sup>3\*</sup>, Anirudh Saraswathula<sup>4\*</sup>, Joachim Vist<sup>1</sup>, Ewoud Schuit<sup>5,6</sup>,  
7  
8 John P. A. Ioannidis<sup>2,7</sup>

9 \*co-first authors

10  
11 1 Department of Learning Informatics Management and Ethics, Karolinska Institutet, Stockholm, Sweden

12 2 Meta-Research Innovation Center at Stanford (METRICS), Stanford University, Stanford, CA, USA

13 3 Sean Parker Institute for the Voice, Department of Otolaryngology–Head and Neck Surgery, Weill  
14  
15 Cornell Medical College, New York, NY, USA

16 4 Department of Otolaryngology–Head and Neck Surgery, Johns Hopkins University School of Medicine,  
17  
18 Baltimore, MD, USA

19 5 Julius Center, University Medical Center Utrecht, Utrecht University, Utrecht, the Netherlands

20 6 Cochrane Netherland, University Medical Center Utrecht, Utrecht University, Utrecht, the Netherlands

21 7 Stanford Prevention Research Center, Department of Medicine, and Department of Epidemiology and  
22  
23 Population Health, Stanford University School of Medicine, Stanford, CA, USA

24  
25  
26  
27  
28  
29 **Supplementary Materials - Index**

30  
31  
32 **Supplementary Data**

33  
34 Supplement 1 – List of included studies *pag. 2*

35  
36 **Supplementary Figures and Tables**

37 Supplementary Table 1 *pag. 7*

38 Supplementary Table 2 *pag. 8*

39  
40  
41  
42  
43  
44  
45  
46  
47  
48  
49  
50  
51  
52  
53  
54  
55  
56  
57  
58  
59  
60

## Supplementary Data

## Supplement 1 – List of included studies

| CDSR_ID       | Title                                                                                                                                                 | Specialty                 | Comparison available |
|---------------|-------------------------------------------------------------------------------------------------------------------------------------------------------|---------------------------|----------------------|
| CD005624.PUB4 | Interventions for great saphenous vein incompetence                                                                                                   | vascular surgery          | No                   |
| CD006931.PUB2 | Submacular surgery for choroidal neovascularisation secondary to age-related macular degeneration                                                     | ophthalmology             | No                   |
| CD002764.PUB2 | Surgery for the resolution of symptoms in malignant bowel obstruction in advanced gynaecological and gastrointestinal cancer                          | general surgery           | No                   |
| CD007119.PUB2 | Interventions for restoring patency of occluded central venous catheter lumens                                                                        | vascular surgery          | No                   |
| CD008509.PUB3 | Alpha-blockers as medical expulsive therapy for ureteral stones                                                                                       | urology                   | No                   |
| CD013085.PUB2 | Balneotherapy for chronic venous insufficiency                                                                                                        | vascular surgery          | No                   |
| CD009959.PUB2 | Interventions for the treatment of Frey's syndrome                                                                                                    | otolaryngology            | No                   |
| CD004008.PUB3 | Interventions for trachoma trichiasis                                                                                                                 | ophthalmology             | No                   |
| CD006134.PUB5 | Oral contraceptives for functional ovarian cysts                                                                                                      | obstetrics and gynecology | No                   |
| CD011650.PUB2 | Management of people with early- or very early-stage hepatocellular carcinoma                                                                         | general surgery           | No                   |
| CD001081.PUB4 | Carotid endarterectomy for symptomatic carotid stenosis                                                                                               | vascular surgery          | Yes                  |
| CD010244.PUB2 | Resection versus other treatments for locally advanced pancreatic cancer                                                                              | general surgery           | Yes                  |
| CD012432.PUB2 | Interventions for managing medication-related osteonecrosis of the jaw                                                                                | otolaryngology            | No                   |
| CD010260.PUB2 | Hysterectomy with radiotherapy or chemotherapy or both for women with locally advanced cervical cancer                                                | obstetrics and gynecology | No                   |
| CD012602.PUB2 | Methods for managing miscarriage: a network meta-analysis                                                                                             | obstetrics and gynecology | Yes                  |
| CD006983.PUB3 | Decompressive surgery for treating nerve damage in leprosy                                                                                            | neurosurgery              | Yes                  |
| CD009590.PUB2 | Endometriosis: an overview of Cochrane Reviews                                                                                                        | obstetrics and gynecology | No                   |
| CD005320.PUB2 | Operative and non-operative treatment options for dislocation of the hip following total hip arthroplasty                                             | orthopaedic surgery       | No                   |
| CD010349.PUB2 | Iodine-131-meta-iodobenzylguanidine therapy for patients with newly diagnosed high-risk neuroblastoma                                                 | neurosurgery              | No                   |
| CD010712      | Nonoperative treatment for lumbar spinal stenosis with neurogenic claudication                                                                        | orthopaedic surgery       | No                   |
| CD011478.PUB2 | Type II or type III radical hysterectomy compared to chemoradiotherapy as a primary intervention for stage IB2 cervical cancer                        | obstetrics and gynecology | No                   |
| CD002116.PUB2 | Drug treatment for faecal incontinence in adults                                                                                                      | general surgery           | No                   |
| CD005029.PUB2 | Treatment for ataxia in multiple sclerosis                                                                                                            | neurosurgery              | No                   |
| CD008107.PUB2 | Perioperative chemo(radio)therapy versus primary surgery for resectable adenocarcinoma of the stomach, gastroesophageal junction, and lower esophagus | general surgery           | No                   |
| CD008602.PUB4 | Interventions for congenital talipes equinovarus (clubfoot)                                                                                           | orthopaedic surgery       | No                   |
| CD004461.PUB3 | Interventions for recurrent idiopathic epistaxis (nosebleeds) in children                                                                             | otolaryngology            | No                   |
| CD006476.PUB3 | Management for intussusception in children                                                                                                            | general surgery           | No                   |
| CD009166.PUB2 | Cervical stitch (cerclage) for preventing preterm birth in multiple pregnancy                                                                         | obstetrics and gynecology | No                   |
| CD002221.PUB2 | Interventions for involitional lower lid entropion                                                                                                    | ophthalmology             | No                   |
| CD009379.PUB2 | Amniotic membrane transplantation for acute ocular burns                                                                                              | ophthalmology             | Yes                  |
| CD003296.PUB3 | Retinoids for preventing the progression of cervical intra-epithelial neoplasia                                                                       | obstetrics and gynecology | No                   |
| CD004917.PUB3 | Interventions for infantile esotropia                                                                                                                 | ophthalmology             | No                   |
| CD003431.PUB3 | Non surgical therapy for anal fissure                                                                                                                 | general surgery           | Yes                  |
| CD007340.PUB2 | Bariatric surgery for non-alcoholic steatohepatitis in obese patients                                                                                 | general surgery           | No                   |

| CDSR_ID       | Title                                                                                                                                                                   | Specialty                 | Comparison available |
|---------------|-------------------------------------------------------------------------------------------------------------------------------------------------------------------------|---------------------------|----------------------|
| CD001122.PUB5 | Laparoscopic ovarian drilling for ovulation induction in women with anovulatory polycystic ovary syndrome                                                               | obstetrics and gynecology | Yes                  |
| CD007156.PUB2 | Interventions for the management of oral submucous fibrosis                                                                                                             | otolaryngology            | No                   |
| CD012802.PUB2 | Ab interno supraciliary microstent surgery for open-angle glaucoma                                                                                                      | ophthalmology             | No                   |
| CD004399.PUB3 | Medical versus surgical interventions for open angle glaucoma                                                                                                           | ophthalmology             | No                   |
| CD009266.PUB2 | Non-steroidal antiandrogen monotherapy compared with luteinising hormone-releasing hormone agonists or surgical castration monotherapy for advanced prostate cancer     | urology                   | No                   |
| CD010273.PUB2 | Interventions for treating postpartum constipation                                                                                                                      | general surgery           | No                   |
| CD009366.PUB2 | Lumbar sympathectomy versus prostanoids for critical limb ischaemia due to non-reconstructable peripheral arterial disease                                              | orthopaedic surgery       | Yes                  |
| CD007060.PUB2 | Liver resection versus other treatments for neuroendocrine tumours in patients with resectable liver metastases                                                         | general surgery           | No                   |
| CD008088.PUB3 | Anti-TNF- $\alpha$ treatment for pelvic pain associated with endometriosis                                                                                              | obstetrics and gynecology | No                   |
| CD004982.PUB6 | Treatment for superficial thrombophlebitis of the leg                                                                                                                   | vascular surgery          | Yes                  |
| CD007939.PUB2 | Single herbal medicine for diabetic retinopathy                                                                                                                         | ophthalmology             | No                   |
| CD002000.PUB3 | Bypass surgery for chronic lower limb ischaemia                                                                                                                         | vascular surgery          | No                   |
| CD012017.PUB2 | Grommets (ventilation tubes) for recurrent acute otitis media in children                                                                                               | otolaryngology            | Yes                  |
| CD009968.PUB2 | Botulinum toxin for upper oesophageal sphincter dysfunction in neurological swallowing disorders                                                                        | general surgery           | No                   |
| CD004272.PUB3 | Surgery versus primary endocrine therapy for operable primary breast cancer in elderly women (70 years plus)                                                            | general surgery           | Yes                  |
| CD007118.PUB2 | Palliative cytoreductive surgery versus other palliative treatments in patients with unresectable liver metastases from gastro-entero-pancreatic neuroendocrine tumours | general surgery           | No                   |
| CD006714.PUB2 | Surgical versus medical methods for second trimester induced abortion                                                                                                   | obstetrics and gynecology | Yes                  |
| CD011174.PUB2 | Interventions for non-tubal ectopic pregnancy                                                                                                                           | obstetrics and gynecology | No                   |
| CD010541.PUB3 | Surgery for epilepsy                                                                                                                                                    | neurosurgery              | Yes                  |
| CD013034.PUB2 | Surgery for patellar tendinopathy (jumper's knee)                                                                                                                       | orthopaedic surgery       | Yes                  |
| CD007481.PUB3 | Chemical pleurodesis versus surgical intervention for persistent and recurrent pneumothoraces in cystic fibrosis                                                        | thoracic surgery          | No                   |
| CD003712.PUB3 | Transmyocardial laser revascularization versus medical therapy for refractory angina                                                                                    | cardiac surgery           | Yes                  |
| CD008997.PUB2 | Non-resection versus resection for an asymptomatic primary tumour in patients with unresectable Stage IV colorectal cancer                                              | general surgery           | No                   |
| CD005081.PUB3 | Medical and surgical treatment for ocular myasthenia                                                                                                                    | ophthalmology             | No                   |
| CD013099.PUB2 | Interventions for bacterial folliculitis and boils (furuncles and carbuncles)                                                                                           | general surgery           | No                   |
| CD011837.PUB2 | Medical and surgical interventions for the treatment of usual-type vulval intraepithelial neoplasia                                                                     | obstetrics and gynecology | No                   |
| CD003951.PUB3 | Surgical versus medical treatment with cyclooxygenase inhibitors for symptomatic patent ductus arteriosus in preterm infants                                            | cardiac surgery           | Yes                  |
| CD007261.PUB2 | Interventions for managing temporomandibular joint osteoarthritis                                                                                                       | orthopaedic surgery       | No                   |
| CD003193.PUB4 | Anticholinergic drugs versus non-drug active therapies for non-neurogenic overactive bladder syndrome in adults                                                         | urology                   | No                   |
| CD009493.PUB2 | N-acetylcarnosine (NAC) drops for age-related cataract                                                                                                                  | ophthalmology             | No                   |
| CD005198.PUB3 | Therapeutic interventions for Burkitt lymphoma in children                                                                                                              | otolaryngology            | No                   |
| CD004981.PUB4 | Treatment for femoral pseudoaneurysms                                                                                                                                   | vascular surgery          | No                   |
| CD003525.PUB2 | Surgery for lateral elbow pain                                                                                                                                          | orthopaedic surgery       | No                   |
| CD013006.PUB2 | Interventions for the management of obesity in people with bipolar disorder                                                                                             | general surgery           | No                   |
| CD013404.PUB2 | Surgical interventions for treating intracapsular hip fractures in older adults: a network meta-analysis                                                                | orthopaedic surgery       | No                   |
| CD011725.PUB2 | Indomethacin for intracranial hypertension secondary to severe traumatic brain injury in adults                                                                         | neurosurgery              | No                   |

| CDSR_ID       | Title                                                                                                                        | Specialty                 | Comparison available |
|---------------|------------------------------------------------------------------------------------------------------------------------------|---------------------------|----------------------|
| CD009526.PUB2 | Ovarian surgery for symptom relief in women with polycystic ovary syndrome                                                   | obstetrics and gynecology | Yes                  |
| CD003855.PUB3 | Surgery versus medical therapy for heavy menstrual bleeding                                                                  | obstetrics and gynecology | Yes                  |
| CD009505.PUB2 | Aromatase inhibitors for uterine fibroids                                                                                    | obstetrics and gynecology | No                   |
| CD003037.PUB2 | Medical versus surgical methods for first trimester termination of pregnancy                                                 | obstetrics and gynecology | Yes                  |
| CD011169.PUB2 | Selective oestrogen receptor modulators (SERMs) for endometriosis                                                            | obstetrics and gynecology | No                   |
| CD007924.PUB3 | Medical interventions for high-grade vulval intraepithelial neoplasia                                                        | obstetrics and gynecology | No                   |
| CD008111.PUB2 | Thymectomy for non-thymomatous myasthenia gravis                                                                             | thoracic surgery          | No                   |
| CD007223.PUB4 | Medical treatments for incomplete miscarriage                                                                                | obstetrics and gynecology | Yes                  |
| CD010308.PUB2 | Interventions for melanoma in situ, including lentigo maligna                                                                | general surgery           | No                   |
| CD007468.PUB4 | Surgical interventions for the early management of Bell's palsy                                                              | neurosurgery              | No                   |
| CD007792.PUB2 | Palliative surgery versus medical management for bowel obstruction in ovarian cancer                                         | general surgery           | No                   |
| CD008455.PUB2 | Interventions for treating bisphosphonate-related osteonecrosis of the jaw (BRONJ)                                           | orthopaedic surgery       | No                   |
| CD002115.PUB5 | Management of faecal incontinence and constipation in adults with central neurological diseases                              | general surgery           | No                   |
| CD006991.PUB2 | Surgical versus medical interventions for chronic rhinosinusitis with nasal polyps                                           | otolaryngology            | No                   |
| CD001496.PUB2 | Pharmacological and surgical interventions for the treatment of gastro-oesophageal reflux in adults and children with asthma | general surgery           | No                   |
| CD008571.PUB2 | Interventions for women with endometrioma prior to assisted reproductive technology                                          | obstetrics and gynecology | No                   |
| CD006544.PUB3 | Prostanoids for critical limb ischaemia                                                                                      | vascular surgery          | No                   |
| CD003435.PUB2 | Surgical decompression for cerebral oedema in acute ischaemic stroke                                                         | neurosurgery              | Yes                  |
| CD013325.PUB2 | Interventions for treating people with symptoms of bladder pain syndrome: a network meta-analysis                            | urology                   | No                   |
| CD001066.PUB3 | Interventions for varicose veins and leg oedema in pregnancy                                                                 | vascular surgery          | No                   |
| CD006388.PUB2 | Octreotide for the treatment of chylothorax in neonates                                                                      | thoracic surgery          | No                   |
| CD003658.PUB3 | Needling for encapsulated trabeculectomy filtering blebs                                                                     | ophthalmology             | No                   |
| CD006152.PUB2 | Decompressive surgery of lower limbs for symmetrical diabetic peripheral neuropathy                                          | orthopaedic surgery       | No                   |
| CD001896.PUB2 | Surgical interruption of pelvic nerve pathways for primary and secondary dysmenorrhoea                                       | obstetrics and gynecology | No                   |
| CD004699.PUB2 | Surgery for local and locally advanced non-small cell lung cancer                                                            | thoracic surgery          | No                   |
| CD002867      | Treatments for secondary postpartum haemorrhage                                                                              | obstetrics and gynecology | No                   |
| CD006373.PUB2 | Interventions for treating functional dysphonia in adults                                                                    | otolaryngology            | No                   |
| CD001541.PUB3 | Interventions for ingrowing toenails                                                                                         | general surgery           | No                   |
| CD013469.PUB2 | Surgical and medical interventions for abdominal aortic graft infections                                                     | vascular surgery          | No                   |
| CD001219      | Corticosteroids for the resolution of malignant bowel obstruction in advanced gynaecological and gastrointestinal cancer     | general surgery           | No                   |
| CD005304.PUB3 | Interventions for primary (intrinsic) tracheomalacia in children                                                             | thoracic surgery          | No                   |
| CD011498.PUB2 | Non-surgical versus surgical treatment for oesophageal cancer                                                                | general surgery           | Yes                  |
| CD002784.PUB3 | Surgery versus thrombolysis for initial management of acute limb ischaemia                                                   | vascular surgery          | Yes                  |
| CD006499.PUB4 | Botulinum toxin for the treatment of strabismus                                                                              | ophthalmology             | Yes                  |
| CD005024.PUB3 | Surgery for traumatic optic neuropathy                                                                                       | general surgery           | No                   |
| CD003243.PUB3 | Laparoscopic fundoplication surgery versus medical management for gastro-oesophageal reflux disease (GORD) in adults         | general surgery           | Yes                  |
| CD003118.PUB2 | Interventions for the treatment of Morton's neuroma                                                                          | orthopaedic surgery       | No                   |
| CD001001.PUB3 | Lung volume reduction surgery for diffuse emphysema                                                                          | thoracic surgery          | No                   |
| CD010784.PUB3 | Medical and surgical interventions for the treatment of urinary stones in children                                           | urology                   | No                   |



| CDSR_ID       | Title                                                                                                                                        | Specialty                 | Comparison available |
|---------------|----------------------------------------------------------------------------------------------------------------------------------------------|---------------------------|----------------------|
| CD000324.PUB2 | Interventions for tubal ectopic pregnancy                                                                                                    | obstetrics and gynecology | No                   |
| CD000526.PUB2 | Interventions for treating tuberculous pericarditis                                                                                          | cardiac surgery           | No                   |
| CD004156.PUB4 | Treatment for spasticity in amyotrophic lateral sclerosis/motor neuron disease                                                               | neurosurgery              | No                   |
| CD004159.PUB3 | Treatment for meralgia paraesthetica                                                                                                         | neurosurgery              | No                   |
| CD006797.PUB2 | Surgical resection versus non-surgical treatment for hepatic node positive patients with colorectal liver metastases                         | general surgery           | No                   |
| CD007510.PUB3 | Botulinum toxin for masseter hypertrophy                                                                                                     | otolaryngology            | No                   |
| CD011523.PUB2 | Medical versus surgical treatment for refractory or recurrent peptic ulcer                                                                   | general surgery           | No                   |
| CD001802.PUB3 | Tonsillectomy or adenotonsillectomy versus non-surgical treatment for chronic/recurrent acute tonsillitis                                    | otolaryngology            | Yes                  |
| CD007383.PUB3 | Surgical versus non-surgical management of abdominal injury                                                                                  | general surgery           | No                   |
| CD006981.PUB2 | Treatment for sialorrhoea (excessive saliva) in people with motor neuron disease/amyotrophic lateral sclerosis                               | otolaryngology            | No                   |
| CD001829.PUB4 | Interventions for treating oral leukoplakia to prevent oral cancer                                                                           | otolaryngology            | No                   |
| CD001934.PUB2 | Surgical versus non-surgical interventions for vocal cord nodules                                                                            | otolaryngology            | No                   |
| CD003412.PUB3 | Interventions for basal cell carcinoma of the skin                                                                                           | dermatology               | Yes                  |
| CD003425.PUB4 | Splenectomy versus conservative management for acute sequestration crises in people with sickle cell disease                                 | general surgery           | No                   |
| CD003983.PUB3 | Decompressive craniectomy for the treatment of high intracranial pressure in closed traumatic brain injury                                   | neurosurgery              | Yes                  |
| CD004098.PUB2 | Levothyroxine or minimally invasive therapies for benign thyroid nodules                                                                     | general surgery           | No                   |
| CD004437.PUB6 | Thrombolytic therapy for pulmonary embolism                                                                                                  | cardiac surgery           | No                   |
| CD004927.PUB4 | Surgical management of functional bladder outlet obstruction in adults with neurogenic bladder dysfunction                                   | urology                   | No                   |
| CD005619.PUB3 | Subacromial decompression surgery for rotator cuff disease                                                                                   | orthopaedic surgery       | No                   |
| CD006032.PUB4 | Steroids for traumatic optic neuropathy                                                                                                      | ophthalmology             | No                   |
| CD006746.PUB4 | Laser peripheral iridoplasty for chronic angle closure                                                                                       | ophthalmology             | No                   |
| CD007281.PUB2 | Interventions for cutaneous Bowen's disease                                                                                                  | dermatology               | No                   |
| CD007404.PUB2 | Interventions for central giant cell granuloma (CGCG) of the jaws                                                                            | otolaryngology            | No                   |
| CD007535.PUB4 | Chinese herbal medicine for subfertile women with polycystic ovarian syndrome                                                                | obstetrics and gynecology | No                   |
| CD008280.PUB2 | Interventions for atrophic rhinitis                                                                                                          | otolaryngology            | No                   |
| CD009244.PUB2 | Interventions for anal canal intraepithelial neoplasia                                                                                       | general surgery           | No                   |
| CD010287.PUB3 | Aromatase inhibitors (letrozole) for subfertile women with polycystic ovary syndrome                                                         | obstetrics and gynecology | Yes                  |
| CD010651.PUB2 | Surgical versus non-surgical management for pleural empyema                                                                                  | thoracic surgery          | Yes                  |
| CD011160.PUB2 | Anti-vascular endothelial growth factor for choroidal neovascularisation in people with pathological myopia                                  | ophthalmology             | Yes                  |
| CD012742.PUB2 | Subconjunctival draining minimally-invasive glaucoma devices for medically uncontrolled glaucoma                                             | ophthalmology             | No                   |
| CD012743.PUB2 | Ab interno trabecular bypass surgery with iStent for open-angle glaucoma                                                                     | ophthalmology             | Yes                  |
| CD012834.PUB2 | Medical and surgical abortion for women living with HIV                                                                                      | obstetrics and gynecology | No                   |
| CD012879.PUB2 | Shoulder replacement surgery for osteoarthritis and rotator cuff tear arthropathy                                                            | orthopaedic surgery       | No                   |
| CD006131.PUB3 | Interventions for Mooren's ulcer                                                                                                             | dermatology               | No                   |
| CD007677.PUB4 | Pentoxifylline for the treatment of endometriosis-associated pain and infertility                                                            | obstetrics and gynecology | No                   |
| CD012740.PUB2 | Ab interno trabecular bypass surgery with Schlemm's canal microstent (Hydrus) for open angle glaucoma                                        | ophthalmology             | No                   |
| CD006151.PUB3 | Fundoplication versus postoperative medication for gastro-oesophageal reflux in children with neurological impairment undergoing gastrostomy | general surgery           | No                   |
| CD010081.PUB2 | Interventions for hidradenitis suppurativa                                                                                                   | dermatology               | No                   |
| CD007630.PUB2 | Surgical orbital decompression for thyroid eye disease                                                                                       | otolaryngology            | Yes                  |
| CD011165.PUB2 | Tonsillectomy or adenotonsillectomy versus non-surgical management for obstructive sleep-disordered breathing in children                    | otolaryngology            | No                   |
| CD005656.PUB3 | Intravitreal steroids for macular edema in diabetes                                                                                          | ophthalmology             | No                   |

| CDSR_ID       | Title                                                                                                                                      | Specialty                 | Comparison available |
|---------------|--------------------------------------------------------------------------------------------------------------------------------------------|---------------------------|----------------------|
| CD009860.PUB2 | Surgery for trigger finger                                                                                                                 | orthopaedic surgery       | Yes                  |
| CD013502      | Surgery for rotator cuff tears                                                                                                             | orthopaedic surgery       | Yes                  |
| CD002180      | Surgery versus non-surgical treatment for bronchiectasis                                                                                   | thoracic surgery          | No                   |
| CD010868.PUB2 | Interventions for dissociated vertical deviation                                                                                           | ophthalmology             | No                   |
| CD001408.PUB2 | Botulinum toxin type A in the treatment of lower limb spasticity in children with cerebral palsy                                           | orthopaedic surgery       | No                   |
| CD003919.PUB2 | Laser trabeculoplasty for open angle glaucoma                                                                                              | ophthalmology             | Yes                  |
| CD010312.PUB2 | Prostaglandins for management of retained placenta                                                                                         | obstetrics and gynecology | No                   |
| CD011693.PUB3 | Ab interno trabecular bypass surgery with Trabectome for open-angle glaucoma                                                               | ophthalmology             | No                   |
| CD008669.PUB3 | Tonsillectomy for periodic fever, aphthous stomatitis, pharyngitis and cervical adenitis syndrome (PFAPA)                                  | otolaryngology            | No                   |
| CD008128.PUB2 | Treatment of valvular heart disease during pregnancy for improving maternal and neonatal outcome                                           | cardiac surgery           | No                   |
| CD001923.PUB2 | Carotid endarterectomy for asymptomatic carotid stenosis                                                                                   | vascular surgery          | Yes                  |
| CD010960.PUB2 | Injection therapies for Achilles tendinopathy                                                                                              | orthopaedic surgery       | No                   |
| CD003738.PUB3 | Interventions for preventing posterior capsule opacification                                                                               | ophthalmology             | No                   |
| CD013000.PUB2 | Interventions for orbital lymphangioma                                                                                                     | otolaryngology            | No                   |
| CD008282      | Adenoidectomy for recurrent or chronic nasal symptoms in children                                                                          | otolaryngology            | No                   |
| CD003263.PUB5 | Interventions for vitiligo                                                                                                                 | dermatology               | No                   |
| CD008583.PUB3 | Ultrasound-guided transvaginal ovarian needle drilling for clomiphene-resistant polycystic ovarian syndrome in subfertile women            | obstetrics and gynecology | No                   |
| CD007810.PUB2 | Adenoidectomy for otitis media in children                                                                                                 | otolaryngology            | No                   |
| CD006181.PUB2 | Prophylactic surgical ligation of patent ductus arteriosus for prevention of mortality and morbidity in extremely low birth weight infants | cardiac surgery           | No                   |
| CD011917.PUB2 | Surgery for limited-stage small-cell lung cancer                                                                                           | thoracic surgery          | No                   |
| CD010264.PUB2 | Surgical versus non-surgical treatment for lumbar spinal stenosis                                                                          | orthopaedic surgery       | Yes                  |
| CD008732.PUB2 | Macular grid laser photocoagulation for branch retinal vein occlusion                                                                      | ophthalmology             | No                   |
| CD011680.PUB2 | Interventions for necrotizing soft tissue infections in adults                                                                             | general surgery           | No                   |
| CD001801.PUB3 | Grommets (ventilation tubes) for hearing loss associated with otitis media with effusion in children                                       | otolaryngology            | No                   |
| CD006205.PUB4 | Interventions for the treatment of oral and oropharyngeal cancers: surgical treatment                                                      | otolaryngology            | No                   |
| CD009245.PUB3 | Interventions for the treatment of Paget's disease of the vulva                                                                            | obstetrics and gynecology | No                   |
| CD012798.PUB3 | Interventions for treating distal intestinal obstruction syndrome (DIOS) in cystic fibrosis                                                | general surgery           | No                   |
| CD008089.PUB2 | Surgery for shoulder osteoarthritis                                                                                                        | orthopaedic surgery       | No                   |
| CD008497.PUB3 | Deep brain and cortical stimulation for epilepsy                                                                                           | neurosurgery              | No                   |
| CD004325.PUB2 | Surgical versus non-surgical treatment for acute anterior shoulder dislocation                                                             | orthopaedic surgery       | No                   |
| CD005048.PUB4 | Interventions for dysphagia in oesophageal cancer                                                                                          | general surgery           | No                   |
| CD000200.PUB2 | Surgery for primary supratentorial intracerebral haemorrhage                                                                               | neurosurgery              | Yes                  |
| CD011031.PUB3 | Laparoscopic surgery for endometriosis                                                                                                     | obstetrics and gynecology | No                   |
| CD010796.PUB2 | Surgery for treating hip impingement (femoroacetabular impingement)                                                                        | orthopaedic surgery       | No                   |
| CD006769.PUB2 | Interventions for late trabeculectomy bleb leak                                                                                            | ophthalmology             | No                   |
| CD001532.PUB5 | Interventions for primary vesicoureteric reflux                                                                                            | urology                   | Yes                  |
| CD008104.PUB2 | Interventions for treating osteochondral defects of the talus in adults                                                                    | orthopaedic surgery       | No                   |
| CD001552.PUB2 | Surgical versus non-surgical treatment for carpal tunnel syndrome                                                                          | orthopaedic surgery       | Yes                  |

1  
2  
3 **Supplementary Figures and Tables**  
4

5 Supplementary table 1. Reviews per specialty  
6

7

| 8 <b>Specialty</b>           | 9 <b>Total reviews</b> | 10 <b>Reviews with at least one comparison (%)</b> |
|------------------------------|------------------------|----------------------------------------------------|
| 11 Cardiac surgery           | 12 6                   | 13 2 (33)                                          |
| 14 Dermatology               | 15 5                   | 16 1 (20)                                          |
| 17 General surgery           | 18 35                  | 19 5 (14)                                          |
| 20 Neurosurgery              | 21 12                  | 22 5 (42)                                          |
| 23 Obstetrics and gynecology | 24 31                  | 25 8 (26)                                          |
| 26 Ophthalmology             | 27 25                  | 28 5 (20)                                          |
| 29 Orthopaedic surgery       | 30 23                  | 31 6 (26)                                          |
| 32 Otolaryngology            | 33 23                  | 34 3 (13)                                          |
| 35 Thoracic surgery          | 36 9                   | 37 1 (11)                                          |
| 38 Urology                   | 39 7                   | 40 1 (14)                                          |
| 41 Vascular surgery          | 42 12                  | 43 4 (33)                                          |

44  
45  
46  
47  
48  
49  
50  
51  
52  
53  
54  
55  
56  
57  
58  
59  
60

Supplementary Table 2. Inconclusive comparisons between surgery and drugs

| Surgical arm                            | Drug arm                                   | Disease                  | Outcome                                                            | Treatment effect (95% CI) | GRADE assessment |
|-----------------------------------------|--------------------------------------------|--------------------------|--------------------------------------------------------------------|---------------------------|------------------|
| Cardiac surgery                         |                                            |                          |                                                                    |                           |                  |
| Transmyocardial laser revascularization | Continued medication                       | Refractory angina        | Overall mortality                                                  | OR=1.12 (0.77-1.63)       | High             |
|                                         |                                            |                          | Postoperative mortality (30 d)                                     | OR=1.19 (0.63-2.24)       | High             |
| Surgical closure                        | IV indomethacin                            | Patent ductus arteriosus | Death before discharge                                             | RR=0.67 (0.34-1.31)       |                  |
| Dermatology                             |                                            |                          |                                                                    |                           |                  |
| Surgical excision                       | Imiquimod                                  | BCC                      | Patient-rated good/excellent cosmetic outcome                      | RR=1 (0.94-1.06)          | Low              |
| General surgery                         |                                            |                          |                                                                    |                           |                  |
| Surgery                                 | Tamoxifen                                  | Primary breast cancer    | Overall survival                                                   | HR=0.98 (0.81-1.2)        | Low              |
| Laparoscopic fundoplication             | Protein pump inhibitors                    | GERD                     | Health-related quality of life (<1 y)                              | SMD=0.14 (-0.02-0.3)+     | Very Low         |
|                                         |                                            |                          | Health-related QOL (1-5 y)                                         | SMD=0.03 (-0.19-0.24)+    | Very Low         |
|                                         |                                            |                          | GORD-specific quality of life (1-5 y)                              | SMD=0.28 (-0.27-0.84)+    | Very Low         |
| Oesophagectomy                          | Chemoradiotherapy and/or radiotherapy      | Oesophageal cancer       | Short-term mortality                                               | RR=0.39 (0.11-1.35)       | Very Low         |
|                                         |                                            |                          | Long-term mortality                                                | RR=1.03 (0.92-1.14)       | Low              |
|                                         |                                            |                          | Medium-term health-related QOL                                     | MD=-0.95 (-2.1-0.2)       | Very Low         |
| Neurosurgery                            |                                            |                          |                                                                    |                           |                  |
| Decompressive surgery                   | Prednisolone                               | Leprosy                  | Change in sensory score after one year                             | MD=0.08 (-2.45-2.61)      | Very Low         |
|                                         |                                            |                          | Proportion of ulnar nerves with sensory improvement after one year | RR=1.13 (0.71-1.77)       | Very Low         |
|                                         |                                            |                          | Change in motor score after one year                               | MD=0.82 (-1.34-2.98)      | Very Low         |
|                                         |                                            |                          | Proportion of ulnar nerves with motor improvement after one year   | RR=0.91 (0.64-1.28)       | Very Low         |
| Decompressive craniectomy               | Medical treatment (including barbiturates) | High ICP in closed TBI   | Neurological unfavourable outcome 6 mo                             | RR=1 (0.71-1.4)           | Low              |
|                                         |                                            |                          | Mortality 6 mo                                                     | RR=0.66 (0.43-1.01)       | Moderate         |
| Obstetrics and gynaecology              |                                            |                          |                                                                    |                           |                  |
| Suction aspiration                      | Vaginal or oral misoprostol                | Abortion                 | Death or serious complication                                      | RR=1 (0.04-25)            |                  |

| Surgical arm                                                        | Drug arm                                                  | Disease                  | Outcome                                                           | Treatment effect (95% CI) | GRADE assessment |
|---------------------------------------------------------------------|-----------------------------------------------------------|--------------------------|-------------------------------------------------------------------|---------------------------|------------------|
| Suction aspiration                                                  | Misoprostol                                               | Abortion                 | Composite outcome of death or serious complication                | RR=1.53 (0.45-5.16)       | Very Low         |
| Suction aspiration                                                  | Misoprostol and mifepristone                              | Abortion                 | Complete miscarriage                                              | RR=1.29 (0.96-1.73)       | Very Low         |
| Suction aspiration                                                  | Vaginal suppositories or im inj. of 9-methylene-PGE2      | Abortion                 | Composite outcome of death or serious complication                | RR=0.14 (0.01-2.74)       | Very Low         |
|                                                                     |                                                           |                          | Abortion not completed with intended method                       | OR=0.62 (0.02-16.6)       |                  |
|                                                                     |                                                           |                          | Ongoing pregnancy                                                 | OR=1.82 (0.54-6.25)       |                  |
|                                                                     |                                                           |                          | Pelvic infection                                                  | OR=0.46 (0.14-1.56)       |                  |
| Dilatation and curettage                                            | Misoprostol                                               | Abortion                 | Composite outcome of death or serious complication                | RR=0.79 (0.34-1.85)       | Very Low         |
| Laparoscopic ovarian drilling                                       | Metformin, Clomiphene                                     | PCOS                     | Menstrual regularity at 6 mo.                                     | OR=1.02 (0.64-1.64)       | Very Low         |
| Laparoscopic ovarian drilling                                       | Letrozele                                                 | PCOS                     | Menstrual regularity at 6 mo.                                     | OR=1.08 (0.64-1.84)       | Very Low         |
| Laparoscopic ovarian drilling                                       | Metformin, Letrozol                                       | PCOS                     | Menstrual regularity at 6 mo.                                     | OR=0.95 (0.49-1.81)       | Very Low         |
| Laparoscopic ovarian drilling                                       | Metformin                                                 | PCOS                     | Menstrual regularity at 6 mo.                                     | OR=1.51 (0.62-3.71)       | Moderate         |
| Laparoscopic ovarian drilling                                       | Gonadotropins                                             | PCOS                     | Improvement in androgenic symptoms 6 mo.                          | OR=3.02 (0.56-16.33)      | Low              |
| Laparoscopic ovarian drilling                                       | Metformin                                                 | PCOS                     | Improvement in androgenic symptoms 6 mo.                          | OR=1 (0.42-2.37)          | Low              |
| Laparoscopic ovarian drilling                                       | Letrozele                                                 | Infertility due to PCOS  | Live birth                                                        | RR=0.72 (0.5-1.05)        | Moderate         |
|                                                                     |                                                           |                          | Rate of ovarian hyperstimulation syndrome                         | RD=0 (-0.01-0.01)         | High             |
| Transcervical resection of endometrium using rollerball coagulation | Hormone therapy or antifibrinolytic                       | Heavy menstrual bleeding | Control of bleeding (cure or improvement to acceptable level) 5 y | RR=1.14 (0.97-1.34)       | Very Low         |
|                                                                     |                                                           |                          | Overall satisfaction with treatment 5 y                           | RR=1.13 (0.94-1.37)       | Very Low         |
| Ophthalmology                                                       |                                                           |                          |                                                                   |                           |                  |
| Amniotic membrane transplantation and medication                    | Lubrication, Antibiotics and Pressure lowering medication | Acute ocular burns       | Epithelial defect 21 d post-injury                                | RR=0.71 (0.27-1.85)       | Low              |
| Argon laser trabeculoplasty                                         | IOP reducing medication                                   | Open angle glaucoma      | Visual field progression                                          | RR=0.7 (0.42-1.16)        |                  |
|                                                                     |                                                           |                          | Optic neuropathy progression                                      | RR=0.71 (0.38-1.34)       |                  |

| Surgical arm                         | Drug arm                                                                | Disease                       | Outcome                                                                                                                                               | Treatment effect (95% CI)   | GRADE assessment |
|--------------------------------------|-------------------------------------------------------------------------|-------------------------------|-------------------------------------------------------------------------------------------------------------------------------------------------------|-----------------------------|------------------|
| Laser surgery                        | intravitreal anti-VEGF                                                  | Pathological myopia           | Proportion of participants with a gain of 3+ lines in BCVA at 1 y                                                                                     | RR=0.32 (0.08-1.33)         | Low              |
| Surgical correction                  | Botulinum toxin                                                         | Strabismus                    | Improved ocular alignment > 10 dioptres, children                                                                                                     | RR=1.1 (0.86-1.41)          | Low              |
| Orthopaedic surgery                  |                                                                         |                               |                                                                                                                                                       |                             |                  |
| Arthroscopic surgery                 | Sclerosing injection                                                    | Jumper's knee                 | Withdrawal rate                                                                                                                                       | OR=1 (0.06-16.89)           | Very Low         |
| Open surgery                         | Corticosteroid injection                                                | Trigger finger                | Resolution of triggering                                                                                                                              | RR=1.48 (0.79-2.76)         | Very low         |
| Open section of the carpal ligament  | NSAID and splinting or corticosteroid injections                        | Carpal tunnel syndrome        | Improvement in clinical symptoms at three months of follow-up                                                                                         | RR=1.09 (0.91-1.32)         |                  |
| Surgical rotator cuff repair         | Non-operative treatment including corticosteroid injection and exercise | Rotator cuff tear             | Pain (VAS) 12 mo                                                                                                                                      | MD=-0.49 (-1.02-0.05)       | Moderate         |
| Otolaryngology                       |                                                                         |                               |                                                                                                                                                       |                             |                  |
| Surgical orbital decompression       | IV Methylprednisolone 1x3 followed by oral prednisolone                 | Thyroid eye disease           | Proportion of successes compared to the proportion of treatment failures as defined by the study authors based on the use of composite outcome scores | RR=0.16 (0.01-1.98)         |                  |
| Thoracic surgery                     |                                                                         |                               |                                                                                                                                                       |                             |                  |
| Open thoracotomy                     | Thoracostomy drainage (with fibrinolytics)                              | Pleural empyema               | Mortality                                                                                                                                             | RR=NA (NA-NA)               | Moderate         |
| VATS                                 | Thoracostomy drainage (with fibrinolytics)                              | Pleural empyema               | Mortality                                                                                                                                             | RR=0.8 (0.04-14.89)         | Low              |
| Urology                              |                                                                         |                               |                                                                                                                                                       |                             |                  |
| Surgical reimplantation of ureters   | Antibiotics                                                             | Primary vesicoureteric reflux | Rate of patients with symptomatic UTI                                                                                                                 | RR=0.95 (0.67-1.35)         |                  |
| Vascular surgery                     |                                                                         |                               |                                                                                                                                                       |                             |                  |
| Surgery including primary amputation | Thrombolysis (w/ rt-Pa or urokinase)                                    | Acute limb ischaemia          | Limb salvage (30 d)                                                                                                                                   | OR=0.89 (0.27-2.91)         | Low              |
| Saphenofemoral disconnection         | Therapeutic LMWH                                                        | Superficial thrombophlebitis  | Symptomatic VTE                                                                                                                                       | RR=5 (0.25-100)             |                  |
| Aspirin and carotid surgery          | Aspirin                                                                 | Carotid stenosis              | Major bleeding<br>Ipsilateral ischaemic stroke, and any operative stroke or death near occlusion                                                      | RR=NA<br>RR=0.89 (0.6-1.32) | Moderate         |

**Abbreviations**

RR: risk ratio

OR: odds ratio

1  
2  
3  
4  
5  
6  
7  
8  
9  
10  
11  
12  
13  
14  
15  
16  
17  
18  
19  
20  
21  
22  
23  
24  
25  
26  
27  
28  
29  
30  
31  
32  
33  
34  
35  
36  
37  
38  
39  
40  
41  
42  
43  
44  
45  
46  
47  
48  
49  
50  
51  
52  
53  
54  
55  
56  
57  
58  
59  
60

HR: hazard ratio  
MD: mean difference  
SMD: standardized mean difference

BCC: basal cell carcinoma of the skin  
GERD: Gastro-oesophageal reflux disease  
GTN: glyceryl tri-nitrate  
IOP: intra-ocular pressure  
PCOS: polycystic ovarian syndrome  
QOL: Quality of life

For peer review only

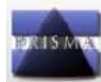

## PRISMA 2020 Checklist

| Section and Topic             | Item # | Checklist item                                                                                                                                                                                                                                                                                       | Location where item is reported |
|-------------------------------|--------|------------------------------------------------------------------------------------------------------------------------------------------------------------------------------------------------------------------------------------------------------------------------------------------------------|---------------------------------|
| <b>TITLE</b>                  |        |                                                                                                                                                                                                                                                                                                      |                                 |
| Title                         | 1      | Identify the report as a systematic review.                                                                                                                                                                                                                                                          | 1                               |
| <b>ABSTRACT</b>               |        |                                                                                                                                                                                                                                                                                                      |                                 |
| Abstract                      | 2      | See the PRISMA 2020 for Abstracts checklist.                                                                                                                                                                                                                                                         | 4                               |
| <b>INTRODUCTION</b>           |        |                                                                                                                                                                                                                                                                                                      |                                 |
| Rationale                     | 3      | Describe the rationale for the review in the context of existing knowledge.                                                                                                                                                                                                                          | 6                               |
| Objectives                    | 4      | Provide an explicit statement of the objective(s) or question(s) the review addresses.                                                                                                                                                                                                               | 4                               |
| <b>METHODS</b>                |        |                                                                                                                                                                                                                                                                                                      |                                 |
| Eligibility criteria          | 5      | Specify the inclusion and exclusion criteria for the review and how studies were grouped for the syntheses.                                                                                                                                                                                          | 7                               |
| Information sources           | 6      | Specify all databases, registers, websites, organisations, reference lists and other sources searched or consulted to identify studies. Specify the date when each source was last searched or consulted.                                                                                            | 7                               |
| Search strategy               | 7      | Present the full search strategies for all databases, registers and websites, including any filters and limits used.                                                                                                                                                                                 | 7                               |
| Selection process             | 8      | Specify the methods used to decide whether a study met the inclusion criteria of the review, including how many reviewers screened each record and each report retrieved, whether they worked independently, and if applicable, details of automation tools used in the process.                     | 7                               |
| Data collection process       | 9      | Specify the methods used to collect data from reports, including how many reviewers collected data from each report, whether they worked independently, any processes for obtaining or confirming data from study investigators, and if applicable, details of automation tools used in the process. | 8                               |
| Data items                    | 10a    | List and define all outcomes for which data were sought. Specify whether all results that were compatible with each outcome domain in each study were sought (e.g. for all measures, time points, analyses), and if not, the methods used to decide which results to collect.                        | 8                               |
|                               | 10b    | List and define all other variables for which data were sought (e.g. participant and intervention characteristics, funding sources). Describe any assumptions made about any missing or unclear information.                                                                                         | 8                               |
| Study risk of bias assessment | 11     | Specify the methods used to assess risk of bias in the included studies, including details of the tool(s) used, how many reviewers assessed each study and whether they worked independently, and if applicable, details of automation tools used in the process.                                    | 8                               |
| Effect measures               | 12     | Specify for each outcome the effect measure(s) (e.g. risk ratio, mean difference) used in the synthesis or presentation of results.                                                                                                                                                                  | 8                               |
| Synthesis methods             | 13a    | Describe the processes used to decide which studies were eligible for each synthesis (e.g. tabulating the study intervention characteristics and comparing against the planned groups for each synthesis (item #5)).                                                                                 | NA                              |
|                               | 13b    | Describe any methods required to prepare the data for presentation or synthesis, such as handling of missing summary statistics, or data conversions.                                                                                                                                                | 7-8                             |
|                               | 13c    | Describe any methods used to tabulate or visually display results of individual studies and syntheses.                                                                                                                                                                                               | 7                               |
|                               | 13d    | Describe any methods used to synthesize results and provide a rationale for the choice(s). If meta-analysis was performed, describe the model(s), method(s) to identify the presence and extent of statistical heterogeneity, and software package(s) used.                                          | 8                               |
|                               | 13e    | Describe any methods used to explore possible causes of heterogeneity among study results (e.g. subgroup analysis, meta-regression).                                                                                                                                                                 | Not relevant                    |
|                               | 13f    | Describe any sensitivity analyses conducted to assess robustness of the synthesized results.                                                                                                                                                                                                         | Not relevant                    |
| Reporting bias assessment     | 14     | Describe any methods used to assess risk of bias due to missing results in a synthesis (arising from reporting biases).                                                                                                                                                                              |                                 |
| Certainty                     | 15     | Describe any methods used to assess certainty (or confidence) in the body of evidence for an outcome.                                                                                                                                                                                                | 7-8                             |



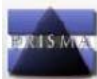

PRISMA 2020 Checklist

1  
2  
3  
4  
5  
6  
7  
8  
9  
10  
11  
12  
13  
14  
15  
16  
17  
18  
19  
20  
21  
22  
23  
24  
25  
26  
27  
28  
29  
30  
31  
32  
33  
34  
35  
36  
37  
38  
39  
40  
41  
42  
43  
44  
45  
46  
47

| Section and Topic                              | Item # | Checklist item                                                                                                                                                                                                                                                                       | Location where item is reported |
|------------------------------------------------|--------|--------------------------------------------------------------------------------------------------------------------------------------------------------------------------------------------------------------------------------------------------------------------------------------|---------------------------------|
| assessment                                     |        |                                                                                                                                                                                                                                                                                      |                                 |
| <b>RESULTS</b>                                 |        |                                                                                                                                                                                                                                                                                      |                                 |
| Study selection                                | 16a    | Describe the results of the search and selection process, from the number of records identified in the search to the number of studies included in the review, ideally using a flow diagram.                                                                                         | 11                              |
|                                                | 16b    | Cite studies that might appear to meet the inclusion criteria, but which were excluded, and explain why they were excluded.                                                                                                                                                          | 11                              |
| Study characteristics                          | 17     | Cite each included study and present its characteristics.                                                                                                                                                                                                                            | Supplement 1                    |
| Risk of bias in studies                        | 18     | Present assessments of risk of bias for each included study.                                                                                                                                                                                                                         | 11 (GRADE)                      |
| Results of individual studies                  | 19     | For all outcomes, present, for each study: (a) summary statistics for each group (where appropriate) and (b) an effect estimate and its precision (e.g. confidence/credible interval), ideally using structured tables or plots.                                                     | 12-13                           |
| Results of syntheses                           | 20a    | For each synthesis, briefly summarise the characteristics and risk of bias among contributing studies.                                                                                                                                                                               | 11                              |
|                                                | 20b    | Present results of all statistical syntheses conducted. If meta-analysis was done, present for each the summary estimate and its precision (e.g. confidence/credible interval) and measures of statistical heterogeneity. If comparing groups, describe the direction of the effect. | p. 13 Table 2 & 3               |
|                                                | 20c    | Present results of all investigations of possible causes of heterogeneity among study results.                                                                                                                                                                                       | Not relevant                    |
|                                                | 20d    | Present results of all sensitivity analyses conducted to assess the robustness of the synthesized results.                                                                                                                                                                           | Not relevant                    |
| Reporting biases                               | 21     | Present assessments of risk of bias due to missing results (arising from reporting biases) for each synthesis assessed.                                                                                                                                                              | Not relevant                    |
| Certainty of evidence                          | 22     | Present assessments of certainty (or confidence) in the body of evidence for each outcome assessed.                                                                                                                                                                                  | 13                              |
| <b>DISCUSSION</b>                              |        |                                                                                                                                                                                                                                                                                      |                                 |
| Discussion                                     | 23a    | Provide a general interpretation of the results in the context of other evidence.                                                                                                                                                                                                    | 15                              |
|                                                | 23b    | Discuss any limitations of the evidence included in the review.                                                                                                                                                                                                                      | 16                              |
|                                                | 23c    | Discuss any limitations of the review processes used.                                                                                                                                                                                                                                | 16                              |
|                                                | 23d    | Discuss implications of the results for practice, policy, and future research.                                                                                                                                                                                                       | 17                              |
| <b>OTHER INFORMATION</b>                       |        |                                                                                                                                                                                                                                                                                      |                                 |
| Registration and protocol                      | 24a    | Provide registration information for the review, including register name and registration number, or state that the review was not registered.                                                                                                                                       | 3                               |
|                                                | 24b    | Indicate where the review protocol can be accessed, or state that a protocol was not prepared.                                                                                                                                                                                       | 3                               |
|                                                | 24c    | Describe and explain any amendments to information provided at registration or in the protocol.                                                                                                                                                                                      | 9                               |
| Support                                        | 25     | Describe sources of financial or non-financial support for the review, and the role of the funders or sponsors in the review.                                                                                                                                                        | 2                               |
| Competing interests                            | 26     | Declare any competing interests of review authors.                                                                                                                                                                                                                                   | 2                               |
| Availability of data, code and other materials | 27     | Report which of the following are publicly available and where they can be found: template data collection forms; data extracted from included studies; data used for all analyses; analytic code; any other materials used in the review.                                           | 2                               |

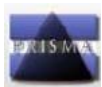

## PRISMA 2020 Checklist

- 1
- 2
- 3
- 4
- 5
- 6
- 7
- 8
- 9
- 10
- 11
- 12
- 13
- 14
- 15
- 16
- 17
- 18
- 19
- 20
- 21
- 22
- 23
- 24
- 25
- 26
- 27
- 28
- 29
- 30
- 31
- 32
- 33
- 34
- 35
- 36
- 37
- 38
- 39
- 40
- 41
- 42
- 43
- 44
- 45
- 46
- 47

10.1136/bmj.n71

For more information, visit: <http://www.prisma-statement.org/>

For peer review only

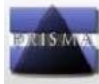

## PRISMA 2020 for Abstracts Checklist

| Section and Topic       | Item # | Checklist item                                                                                                                                                                                                                                                                                        | Reported (Yes/No) |
|-------------------------|--------|-------------------------------------------------------------------------------------------------------------------------------------------------------------------------------------------------------------------------------------------------------------------------------------------------------|-------------------|
| <b>TITLE</b>            |        |                                                                                                                                                                                                                                                                                                       |                   |
| Title                   | 1      | Identify the report as a systematic review.                                                                                                                                                                                                                                                           | Yes               |
| <b>BACKGROUND</b>       |        |                                                                                                                                                                                                                                                                                                       |                   |
| Objectives              | 2      | Provide an explicit statement of the main objective(s) or question(s) the review addresses.                                                                                                                                                                                                           | Yes               |
| <b>METHODS</b>          |        |                                                                                                                                                                                                                                                                                                       |                   |
| Eligibility criteria    | 3      | Specify the inclusion and exclusion criteria for the review.                                                                                                                                                                                                                                          | Yes               |
| Information sources     | 4      | Specify the information sources (e.g. databases, registers) used to identify studies and the date when each was last searched.                                                                                                                                                                        | Yes               |
| Risk of bias            | 5      | Specify the methods used to assess risk of bias in the included studies.                                                                                                                                                                                                                              | Yes               |
| Synthesis of results    | 6      | Specify the methods used to present and synthesise results.                                                                                                                                                                                                                                           | Yes               |
| <b>RESULTS</b>          |        |                                                                                                                                                                                                                                                                                                       |                   |
| Included studies        | 7      | Give the total number of included studies and participants and summarise relevant characteristics of studies.                                                                                                                                                                                         | Yes               |
| Synthesis of results    | 8      | Present results for main outcomes, preferably indicating the number of included studies and participants for each. If meta-analysis was done, report the summary estimate and confidence/credible interval. If comparing groups, indicate the direction of the effect (i.e. which group is favoured). | Yes               |
| <b>DISCUSSION</b>       |        |                                                                                                                                                                                                                                                                                                       |                   |
| Limitations of evidence | 9      | Provide a brief summary of the limitations of the evidence included in the review (e.g. study risk of bias, inconsistency and imprecision).                                                                                                                                                           | No                |
| Interpretation          | 10     | Provide a general interpretation of the results and important implications.                                                                                                                                                                                                                           | Yes               |
| <b>OTHER</b>            |        |                                                                                                                                                                                                                                                                                                       |                   |

1  
2  
3  
4  
5  
6  
7  
8  
9  
10  
11  
12  
13  
14  
15  
16  
17  
18  
19  
20  
21  
22  
23  
24  
25  
26  
27  
28  
29  
30  
31  
32  
33  
34  
35  
36  
37  
38  
39  
40  
41  
42  
43  
44  
45  
46  
47

|              |    |                                                       |     |
|--------------|----|-------------------------------------------------------|-----|
| Funding      | 11 | Specify the primary source of funding for the review. | Yes |
| Registration | 12 | Provide the register name and registration number.    | Yes |

*From:* Page MJ, McKenzie JE, Bossuyt PM, Boutron I, Hoffmann TC, Mulrow CD, et al. The PRISMA 2020 statement: an updated guideline for reporting systematic reviews. *BMJ* 2021;372:n71. doi: 10.1136/bmj.n71

For more information, visit: <http://www.prisma-statement.org/>

# BMJ Open

## Availability of evidence and comparative effectiveness for surgical versus drug interventions: an overview of systematic reviews and meta-analyses

|                                 |                                                                                                                                                                                                                                                                                                                                                                                                                                                                                                                                                                                                                                                                                                                                                                                                                                                                                                                                                                                                        |
|---------------------------------|--------------------------------------------------------------------------------------------------------------------------------------------------------------------------------------------------------------------------------------------------------------------------------------------------------------------------------------------------------------------------------------------------------------------------------------------------------------------------------------------------------------------------------------------------------------------------------------------------------------------------------------------------------------------------------------------------------------------------------------------------------------------------------------------------------------------------------------------------------------------------------------------------------------------------------------------------------------------------------------------------------|
| Journal:                        | <i>BMJ Open</i>                                                                                                                                                                                                                                                                                                                                                                                                                                                                                                                                                                                                                                                                                                                                                                                                                                                                                                                                                                                        |
| Manuscript ID                   | bmjopen-2023-076675.R1                                                                                                                                                                                                                                                                                                                                                                                                                                                                                                                                                                                                                                                                                                                                                                                                                                                                                                                                                                                 |
| Article Type:                   | Original research                                                                                                                                                                                                                                                                                                                                                                                                                                                                                                                                                                                                                                                                                                                                                                                                                                                                                                                                                                                      |
| Date Submitted by the Author:   | 19-Nov-2023                                                                                                                                                                                                                                                                                                                                                                                                                                                                                                                                                                                                                                                                                                                                                                                                                                                                                                                                                                                            |
| Complete List of Authors:       | Zavalis, Emmanuel A.; Karolinska Institutet, Department of Learning Informatics Management and Ethics; Stanford University, Meta-Research Innovation Center at Stanford (METRICS)<br>Rameau, Anaïs; Weill Cornell Medical College, Sean Parker Institute for the Voice, Department of Otolaryngology–Head and Neck Surgery<br>Saraswathula, Anirudh; The Johns Hopkins University School of Medicine, Department of Otolaryngology–Head and Neck Surgery<br>Vist, Joachim; Karolinska Institutet, Department of Learning Informatics Management and Ethics<br>Schuit, Ewoud; Utrecht University, Julius Center for Health Sciences and Primary Care, University Medical Center Utrecht; Utrecht University, Cochrane Denmark, University Medical Center Utrecht<br>Ioannidis, John; Stanford University, Stanford Prevention Research Center, Department of Medicine, and Department of Epidemiology and Population Health; Stanford University, Meta-Research Innovation Center at Stanford (METRICS) |
| <b>Primary Subject Heading</b>: | Evidence based practice                                                                                                                                                                                                                                                                                                                                                                                                                                                                                                                                                                                                                                                                                                                                                                                                                                                                                                                                                                                |
| Secondary Subject Heading:      | Surgery, Medical management                                                                                                                                                                                                                                                                                                                                                                                                                                                                                                                                                                                                                                                                                                                                                                                                                                                                                                                                                                            |
| Keywords:                       | Decision Making, Systematic Review, SURGERY                                                                                                                                                                                                                                                                                                                                                                                                                                                                                                                                                                                                                                                                                                                                                                                                                                                                                                                                                            |
|                                 |                                                                                                                                                                                                                                                                                                                                                                                                                                                                                                                                                                                                                                                                                                                                                                                                                                                                                                                                                                                                        |

SCHOLARONE™  
Manuscripts



I, the Submitting Author has the right to grant and does grant on behalf of all authors of the Work (as defined in the below author licence), an exclusive licence and/or a non-exclusive licence for contributions from authors who are: i) UK Crown employees; ii) where BMJ has agreed a CC-BY licence shall apply, and/or iii) in accordance with the terms applicable for US Federal Government officers or employees acting as part of their official duties; on a worldwide, perpetual, irrevocable, royalty-free basis to BMJ Publishing Group Ltd ("BMJ") its licensees and where the relevant Journal is co-owned by BMJ to the co-owners of the Journal, to publish the Work in this journal and any other BMJ products and to exploit all rights, as set out in our [licence](#).

The Submitting Author accepts and understands that any supply made under these terms is made by BMJ to the Submitting Author unless you are acting as an employee on behalf of your employer or a postgraduate student of an affiliated institution which is paying any applicable article publishing charge ("APC") for Open Access articles. Where the Submitting Author wishes to make the Work available on an Open Access basis (and intends to pay the relevant APC), the terms of reuse of such Open Access shall be governed by a Creative Commons licence – details of these licences and which [Creative Commons](#) licence will apply to this Work are set out in our licence referred to above.

Other than as permitted in any relevant BMJ Author's Self Archiving Policies, I confirm this Work has not been accepted for publication elsewhere, is not being considered for publication elsewhere and does not duplicate material already published. I confirm all authors consent to publication of this Work and authorise the granting of this licence.

# Availability of evidence and comparative effectiveness for surgical versus drug interventions: an overview of systematic reviews and meta-analyses

Emmanuel A. Zavalis<sup>1,2\*</sup>, Anaïs Rameau<sup>3\*</sup>, Anirudh Saraswathula<sup>4\*</sup>, Joachim Vist<sup>1</sup>, Ewoud Schuit<sup>5,6</sup>, John P. A. Ioannidis<sup>2,7</sup>

\*co-first authors

1 Department of Learning Informatics Management and Ethics, Karolinska Institutet, Stockholm, Sweden

2 Meta-Research Innovation Center at Stanford (METRICS), Stanford University, Stanford, CA, USA

3 Sean Parker Institute for the Voice, Department of Otolaryngology–Head and Neck Surgery, Weill Cornell Medical College, New York, NY, USA

4 Department of Otolaryngology–Head and Neck Surgery, Johns Hopkins University School of Medicine, Baltimore, MD, USA

5 Julius Center for Health Sciences and Primary Care, University Medical Center Utrecht, Utrecht University, Utrecht, the Netherlands

6 Cochrane Netherland, University Medical Center Utrecht, Utrecht University, Utrecht, the Netherlands

7 Stanford Prevention Research Center, Department of Medicine, and Department of Epidemiology and Population Health, Stanford University School of Medicine, Stanford, CA, USA

## Corresponding author:

Emmanuel A. Zavalis

E-mail: [emmanuel.zavalis@ki.se](mailto:emmanuel.zavalis@ki.se)

**Word count:** 3688

**Publication history:** A preprint of the manuscript has been deposited in medRxiv: doi:

<https://doi.org/10.1101/2023.01.30.23285207>

## Declarations

### Ethics approval and consent to participate

Not applicable

### Consent for publication

Not applicable

### Availability of data and materials

The dataset supporting the conclusions of this article, and the used code is available in the Open Science Framework repository.

### Conflict of interest

Anaïs Rameau is a medical advisor for Perceptron Health, Inc.

### Funding

The work of John Ioannidis has been funded by an unrestricted gift from Sue and Bob O'Donnell. Anaïs Rameau is supported by a Paul B. Beeson Emerging Leaders Career Development Award in Aging (K76 AG079040) from the National Institute on Aging and by the Bridge2AI award (OT2 OD032720) from the NIH Common Fund. Anirudh Saraswathula was supported by the National Institute on Deafness and Other Communication Disorders training grant 2T32DC000027. Ewoud Schuit gratefully acknowledges financial contribution for his research by the Netherlands Organisation for Scientific Research (project 825.14.001).

### Authors' contributions

AR, AS, EAZ and JPAI developed the idea, EAZ and JPAI interpreted the review data, JV and EAZ extracted the data. ES aided in the statistical analysis. All authors reviewed the manuscript and have edited and approved the submission.

### Acknowledgements

Not applicable



## Abstract

**Objectives.** To examine the prevalence of comparisons of surgery to drug regimens, the strength of evidence of such comparisons, and whether surgery or the drug intervention was favored.

**Design.** Systematic review of systematic reviews (umbrella review)

**Data sources.** Cochrane Database of Systematic Reviews (CDSR).

**Eligibility criteria.** Systematic reviews attempting to compare surgical to drug interventions.

**Data extraction.** We extracted whether the review found any randomized controlled trials for eligible comparisons. Individual trial results were extracted directly from the systematic review.

**Synthesis.** The outcomes of each meta-analysis was re-synthesized into random-effects meta-analyses. Egger's test and excess significance were assessed.

**Results.** Overall, 188 systematic reviews intended to compare surgery versus drugs. Only 41 included data from at least one RCT (total, 165 RCTs) and covered a total of 103 different outcomes of various comparisons of surgery versus drugs. A GRADE assessment was performed by the Cochrane reviewers for 87 (83%) outcomes in the reviews, indicating the strength of evidence was high in 4 outcomes (4%), moderate in 22 (21%), low in 27 (26%) and very low in 33 (32%). Based on 95% confidence intervals, the surgical intervention was favored in 38/103 (37%), and the drugs were favored in 13/103 (13%) outcomes. Of the outcomes with high GRADE rating, only one showed conclusive superiority in our re-analysis (sphincterotomy was better than medical therapy for anal fissure). Of the 22 outcomes with moderate GRADE rating, 6 (27%) were inconclusive, 14 (64%) were in favor of surgery, and 2 (9%) were in favor of drugs. There was no evidence of excess significance.

1  
2  
3 **Conclusions.** Though the relative merits of surgical versus drug interventions are important to  
4 know for many diseases, high strength randomized evidence is rare. More randomized trials  
5 comparing surgery to drug interventions are needed.  
6  
7  
8  
9

10 **Protocol registration.** [www.doi.org/10.17605/OSF.IO/RK7HU](http://www.doi.org/10.17605/OSF.IO/RK7HU)  
11  
12  
13  
14  
15  
16  
17  
18  
19  
20  
21  
22  
23  
24  
25  
26  
27  
28  
29  
30  
31  
32  
33  
34  
35  
36  
37  
38  
39  
40  
41  
42  
43  
44  
45  
46  
47  
48  
49  
50  
51  
52  
53  
54  
55  
56  
57  
58  
59  
60

For peer review only

### Strengths and limitations of this study

- The Cochrane database offers comprehensive coverage of health interventions with detailed methods sections that are likely to convey the intention to study surgical versus drug interventions even if no such randomized trials are found.
- Journal-published systematic reviews outside of Cochrane were not considered, but these are unlikely to include topics where no eligible randomized trials are found.
- We did not consider endovascular and endoscopic interventions in the surgery group and we did not consider non-pharmaceutical interventions in the control group.
- We did not consider non-randomized observational studies, but these may have additional biases in estimating the outcomes of surgical versus drug interventions.

## Introduction

Many diseases are treated or managed with surgery. Some of them may also be addressed by pharmaceutical interventions and studying the effectiveness of these different interventions is important in optimizing shared decision-making for patients and physicians. However, the amount and certainty of the evidence we hold in healthcare is limited[1], and this situation is likely worse for surgical interventions due to serious challenges in running placebo-controlled or comparative effectiveness trials[2]. Challenges to controlled trials include unique patient anatomy, operator dependent variables such as the skill or experience of the surgeon[3–5], and the difficulty of successful blinding[6]. Due to these challenges, randomized controlled trials (RCTs) in surgery are less common than in non-surgical medical specialties. Although there have been calls to strengthen the quality of the evidence in surgery[2,7,8], these have resulted in relatively few RCTs assessing surgical interventions, particularly in comparison to medical treatments.

A summary of the existing body, mapping the gaps of evidence on surgical versus medical interventions across diseases does not exist in the literature. A synthesis of this existing body of evidence is important to guide evidence-based care and inform decisions in the clinic where surgery and medical management are both reasonable options. We hypothesized that there may be a dearth of randomized evidence comparing surgery versus drugs and that even in topics where such RCTs exist the evidence provided by them might be weak. To find RCTs comparing surgical vs. pharmaceutical interventions, we conducted an umbrella review (an overview of systematic reviews) [9,10] by searching the Cochrane Database of Systematic Reviews for reviews considering comparisons of surgery to drugs. We aimed to examine the prevalence of

1  
2  
3 intended comparisons of surgery to drug regimens, how often such comparisons had any RCTs,  
4  
5 and, whenever RCTs were available, what was the strength of evidence of such comparisons, and  
6  
7 whether surgery or the drug intervention was favored.  
8  
9

## 10 11 12 **Materials and Methods** 13

14  
15 This systematic review of systematic reviews (umbrella review) was structured based on the  
16  
17 guidance provided by Belbasis et al. [10] (for more information on reviews of reviews, see also  
18  
19 Cochrane Handbook Chapter V: Overviews of Reviews [11]). For reporting, we adapted the  
20  
21 Preferred Reporting Items for Systematic Review and Meta-Analysis (PRISMA) guidelines[12]  
22  
23 and the checklists are found as supplements. The protocol for the data collection, and analysis  
24  
25 was pre-registered on the Open Science Framework website [13], together with the raw data and  
26  
27 code.  
28  
29  
30  
31  
32  
33  
34

### 35 *Search strategy and selection criteria* 36

37 We queried the Cochrane Database of Systematic Reviews using the term “surg\*” in  
38  
39 “Title/Abstract/Keywords” (“surg\*(ti;ab;kw)”) on April 25, 2022. Inclusion criteria for reviews  
40  
41 were search of RCTs comparing a surgical to a drug intervention.  
42  
43  
44  
45  
46

47 A surgical intervention was defined as a procedural technique aiming to change anatomy to treat  
48  
49 or alleviate a pathology or symptom (including dermatological excisions). We excluded  
50  
51 endoscopic and endovascular procedures since many of them are performed by medical rather  
52  
53 than surgical specialists. A drug intervention was defined as a treatment that utilized a non-  
54  
55  
56  
57

1  
2  
3 supplement and non-vitamin, pharmaceutical agent. Dental procedures, radiation treatment, as  
4 well as comparisons of surgery vs. no treatment or only placebo were excluded from our study.  
5  
6  
7  
8  
9  
10  
11  
12  
13  
14  
15  
16  
17  
18  
19  
20  
21  
22  
23  
24  
25  
26  
27  
28  
29  
30  
31  
32  
33  
34  
35  
36  
37  
38  
39  
40  
41  
42  
43  
44  
45  
46  
47  
48  
49  
50  
51  
52  
53  
54  
55  
56  
57  
58  
59  
60

Cochrane reviews that intended to compare surgical and pharmaceutical interventions were considered even in cases where the review was unsuccessful in finding any such comparisons.

As many surgical procedures also require drug regimens (e.g., pre-operatively or as background treatment), we allowed comparisons where the surgical arm including a drug intervention was compared to a drug intervention as well. Comparisons of surgery to surgery plus drugs were not eligible, as both arms used surgery.

The articles' abstracts were reviewed by EAZ, and JV who coded the reviews independently for eligibility (include, exclude, unsure) first and then sought to reach a consensus among the reviews coded as unsure by either reviewer. If either reviewer included the review, it was included directly. Remaining differences were mediated by JPAI, and a final check of all included studies was performed by JPAI, EAZ and JV.

### *Main outcomes*

The main outcome assessed was the percentage of Cochrane systematic reviews that found eligible RCTs comparing head-to-head surgical and pharmacological interventions among all the reviews aiming to look for such studies. The strength of evidence of the existing comparison was also treated as a main outcome, as were the direction of effects in the review assessments, both in the original Cochrane analysis and our standardized re-analysis.

### *Data extraction*

EAZ extracted data for the included systematic reviews. The included systematic reviews were further classified into their corresponding surgical specialty field: cardiac surgery, dermatology, general surgery, neurosurgery, obstetrics and gynaecology, ophthalmology, orthopaedic surgery, otolaryngology, plastic surgery, thoracic surgery, urology and vascular surgery.

Whenever data were available from at least one RCT comparing a surgical to a drug arm, we identified the primary outcome(s) of the systematic review for the eligible comparison(s) by examining the methods section of the systematic review, and classified it as either mortality, composite or non-mortality. Data, in the form of contingency tables or means, standard deviations and number of participants in each arms, from individual RCTs were then collected from Cochrane eligible reviews. We also collected available GRADE assessments[14] for the eligible comparisons and outcomes and the summary effect size as well as the 95% confidence interval of the effect for the eligible comparison outcomes. Reviews that found no RCT of drugs to surgery were tabulated as having no data.

### *Meta-analysis*

As Cochrane reviewers may have used different statistical models in each topic to combine the results of RCTs in meta-analyses we aimed for standardization. To achieve it, we recalculated the summary effect size and heterogeneity for each topic using a random effects model following the Hartung-Knapp-Sidik-Jonkman approach[15,16] so that all outcomes/topics would be analyzed with the same statistical methods. The modified Haldane-Anscombe continuity

1  
2  
3 correction was used, i.e. when studies had no event in either the surgical or the drug arm we  
4  
5 added 0.5 to the entire contingency table of the specific study[17].  
6  
7

8  
9  
10 The analysis of the data was performed using R version 4.1.3 (2022-03-10)[18], with assessment  
11  
12 of statistical significance using a threshold for  $\alpha$  of 0.005, as previously proposed[19]. The  
13  
14 Wilson approach was used for confidence intervals (99.5%) created for the primary outcomes.  
15  
16

### 17 18 19 *Additions to the protocol*

20  
21 The original pre-registered protocol can be found in [www.doi.org/10.17605/OSF.IO/3QVW9](http://www.doi.org/10.17605/OSF.IO/3QVW9).  
22  
23

24  
25  
26 Some additions were made during the process of conducting this umbrella review. For each  
27  
28 review, we noted the search date of the reviews to understand how old they may be. We assessed  
29  
30 inter-rater reliability using Cohen's  $\kappa$ . We also probed for hints of bias by using the test of  
31  
32 excess significance for each topic with 2 or more RCTs (and for the composite of observed and  
33  
34 expected statistical significant results across all topics) [20], and small-study effects Egger's  
35  
36 regression for meta-analyses with 3 or more RCTs [21].  
37  
38

39  
40  
41  
42 For each RCT in the included reviews we extracted their year of publication to capture how  
43  
44 recent the evidence was. Then, we extracted the specialty orientation of the journal, in which the  
45  
46 RCT was published, using the categories "mostly surgical", "general", and "mostly non-  
47  
48 surgical". The category "mostly surgical" includes those journals that have "surgery" in their  
49  
50 title, those that have the name of a surgical specialty in their title, and those affiliated with a  
51  
52 surgical society. The category "general" pertains to journals that cover all of medicine and its  
53  
54  
55  
56  
57



1  
2  
3 specialties, surgical and non-surgical. The category “mostly non-surgical” includes all the  
4  
5 remaining journals. We assessed whether the direction of effects (favoring surgery or favoring  
6  
7 drug) was associated with the type of journal, hypothesizing that RCTs published in mostly  
8  
9 surgical journals may be more likely than other journals to favor surgery. We also examined  
10  
11 whether the eligible RCTs that were included in the systematic reviews might have any overlap  
12  
13 between different reviews. Finally we extracted information on risk of bias assessments of the  
14  
15 eligible RCTs, as these assessments had been performed in the Cochrane systematic reviews that  
16  
17 had included the RCTs.  
18  
19  
20  
21  
22  
23  
24  
25

## 26 **Patient and Public Involvement**

27  
28 No patients were involved in the design and conduct of this umbrella review  
29  
30  
31  
32  
33  
34  
35  
36  
37  
38  
39  
40  
41  
42  
43  
44  
45  
46  
47  
48  
49  
50  
51  
52  
53  
54  
55  
56  
57  
58  
59  
60

## Results

### *Search results*

The selection flowchart for Cochrane systematic reviews is represented in Figure 1. The search strategy retrieved 2495 articles from the Cochrane Database of Systematic Reviews. Among them, 440 were excluded by an automated search for withdrawn reviews and of studies with no mention of the word surgery and any of its variations in the abstract. Further manual assessment of titles and abstracts in duplicate resulted in 223 Cochrane reviews being potentially eligible. The inter-rater reliability was fair with a  $\kappa$  of 0.36 and 90% agreement on exclusion. All reviewer differences were in the articles classified as “unsure” by either reviewer.

Upon full-text evaluation, 35 were excluded: in 5 reviews, the surgical and drug treatments were not in separate arms and hence they were not an eligible head-to-head comparison[22–26]; in 7 reviews, there was no surgical intervention arm[27–33]; in 17 reviews, there was no drug intervention [34–39,39–49]); 2 reviews were excluded for evaluating an endoscopic intervention [50,51]; 3 reviews were excluded for evaluating an endovascular intervention [52–54]; and finally 1 review was excluded for being an umbrella review[55].

Therefore, 188 Cochrane reviews were found to meet the inclusion criteria (Supplemental Digital Content data file 1). Of those, 147 Cochrane reviews aimed to investigate surgical versus drug interventions but were unable to find any RCTs meeting their selection criteria. The remaining 41 reviews contained data for at least one RCT in at least one head-to-head comparison of a surgical versus a drug intervention arm (22% (99.5% CI 14 to 31%)).

1  
2  
3 The 188 reviews covered all major surgical specialties (Supplementary Table 1), with the most  
4 commonly represented specialties being general surgery (n=35), obstetrics and gynecology  
5 (n=31), ophthalmology (n=25), orthopedic surgery (n=23) and otolaryngology (n=23). When  
6 examining whether any specialty had compared surgery to drugs more than others, no significant  
7 difference was found (Fisher's exact p=0.62).  
8  
9  
10  
11  
12  
13  
14  
15  
16

### 17 *Eligible RCTs for surgery versus drug comparisons*

18  
19 The 41 eligible reviews with data included 103 comparisons of surgery versus drug treatments  
20 with data on various primary outcomes (Table 1), and they included data from a total of 165  
21 RCTs with a total of 295 primary outcome assessments. For the 165 trials, the median  
22 publication year was 2005 and the interquartile range was 1994 to 2016. The median search date  
23 year of the eligible reviews was 2016 (interquartile range, 2010 to 2022). 19 of the 165 trials  
24 were part of two different Cochrane reviews. 14 of these 19 trials also overlapped in terms of  
25 addressing the same outcome and treatment arms. The overlapping studies comprised >50% of  
26 the included RCTs in 2 of 103 meta-analyses.  
27  
28  
29  
30  
31  
32  
33  
34  
35  
36  
37  
38  
39

### 40 *Risk of bias in eligible RCTs*

41  
42 Risk of bias assessments of the 165 eligible RCTs by the authors of the original Cochrane  
43 systematic reviews did not always include the same elements. Specifically, for generation of the  
44 randomization sequence, information had been extracted in 141 trials and of those 6 (4%) were  
45 deemed to be at high risk of bias, 42 (30%) were unclear and 93 (66%) were at low risk of bias.  
46  
47 The respective numbers were 9 (6%) high risk, 63 (39%) unclear, and 89 (55%) low risk among  
48  
49  
50  
51  
52  
53  
54  
55  
56  
57  
58  
59  
60

1  
2  
3 (6%) low risk among 139 RCTs extracted for performance bias; 47 (34%) high risk, 71 (51%)  
4 unclear, and 21 (15%) low risk among 139 RCTs extracted for detection bias; 20 (16%) high  
5 risk, 15 (12%) unclear, and 90 (72%) low risk among 125 RCTs extracted for attrition bias; 17  
6 (12%) high risk, 56 (41%) unclear, and 64 (47%) low risk among 137 RCTs extracted for  
7 reporting bias. and 17 (13%) high risk, 29 (23%) unclear, and 80 (64%) low risk among 126  
8 extracted for other risk of bias.  
9  
10  
11  
12  
13  
14  
15  
16  
17  
18

### 19 *Comparative effectiveness of surgery versus drugs*

20  
21 Based on the 95% confidence interval of the summary estimate obtained by the Cochrane review  
22 authors, surgery was more effective in 36 of the 103 outcomes of various comparisons (35%  
23 (99.5% CI 23 to 49%)), and drugs were more effective in 15 (15% (99.5% CI 6 to 26%)). Fifty-  
24 two (50% (99.5 CI% 37 to 64%)) outcomes were inconclusive. The respective numbers were  
25 1/12 (8%), 1/12 (8%), and 10/12 (83%) for mortality outcomes; 3/11 (27%), 3/11 (27%) and 5/11  
26 (46%) for composite outcomes; and 32/80 (40%), 11/80 (14%), and 37/80 (46%) for non-  
27 mortality outcomes.  
28  
29  
30  
31  
32  
33  
34  
35  
36  
37  
38  
39

40 When we standardized the meta-analyses to use the same random effects method for all analyses,  
41 surgery was favored in 28/103 outcomes (32%), drugs were favored in 9/103 (10%) outcomes  
42 and 66/103 (58%) outcomes were inconclusive. The respective numbers were 1/12 (8%), 0/12  
43 (0%), and 11/12 (92%) for mortality outcomes; 3/11 (18%), 2/11 (27%) and 6/11 (55%) for  
44 composite outcomes; and 24/80 (30%) 7/80 (9%), and 49/80 (61%) for non-mortality outcomes.  
45  
46  
47  
48  
49  
50  
51  
52  
53  
54  
55  
56  
57  
58  
59  
60

1  
2  
3 Table 2 shows the topics for which the surgical intervention was found to be more effective and  
4  
5 Table 3 shows those where the drug arm was found to be more effective, all according to the  
6  
7 Cochrane authors' analysis. Supplementary Table 2 does the same for the topics for which the  
8  
9 comparisons were inconclusive.  
10  
11

### 12 13 14 *Tests of bias and heterogeneity*

15  
16 Of the 103 comparisons, only 31 had  $\geq 3$  studies to be able to run an Egger regression for small  
17  
18 study effects and only 5 had at least 10 studies to allow a meaningful application of this  
19  
20 regression test. 3/5 with 10 or more studies had a small study effects signal suggestive of  
21  
22 potential publication bias ( $p < 0.05$ ); all 3 compared surgical to pharmacological methods of  
23  
24 abortion. The test of excess significance applied to all outcomes with  $\geq 2$  studies gave signals of  
25  
26 potential bias in 16/53 outcomes (245 individual study outcomes) and across all outcomes the  
27  
28 expected number of statistically significant results was 74 versus an observed 84 across 245  
29  
30 study outcomes ( $p = 0.27$ ). Among the 50 topics with 2 or more studies, the median of  $I^2$  was 43%  
31  
32 (IQR, 0%-80%).  
33  
34  
35  
36  
37  
38  
39  
40  
41

### 42 *Strength of evidence according to GRADE*

43  
44 GRADE assessment of the strength of the evidence showed high rating for 4 outcomes (4%),  
45  
46 moderate for 22 (21%), low for 27 (26%), and very low for 33 (32%). No GRADE assessment  
47  
48 was performed for 17 (17%) outcomes.  
49  
50  
51  
52  
53  
54  
55  
56  
57  
58  
59  
60

1  
2  
3 According to GRADE assessments, only cardiac surgery, obstetrics and gynecology and general  
4 surgery interventions had high GRADE ratings. Otolaryngology and dermatology had many  
5 moderate ratings. Almost all other GRADE ratings were low or very low (Table 4).  
6  
7  
8  
9

10  
11  
12 Of the four outcomes with high GRADE rating, sphincterotomy for anal fissure showed  
13 superiority over medical treatment while the other three comparisons were inconclusive. Of the  
14 22 outcomes with moderate GRADE rating, 6 (27%) were inconclusive, 14 (64%) were in favor  
15 of surgery, and 2 (9%) were in favor of the drug regimen according to the calculations of the  
16  
17  
18  
19  
20  
21  
22  
23  
24  
25  
26  
27  
28  
29  
30  
31  
32  
33  
34  
35  
36  
37  
38  
39  
40  
41  
42  
43  
44  
45  
46  
47  
48  
49  
50  
51  
52  
53  
54  
55  
56  
57  
58  
59  
60

Of the four outcomes with high GRADE rating, sphincterotomy for anal fissure showed superiority over medical treatment while the other three comparisons were inconclusive. Of the 22 outcomes with moderate GRADE rating, 6 (27%) were inconclusive, 14 (64%) were in favor of surgery, and 2 (9%) were in favor of the drug regimen according to the calculations of the Cochrane authors (14 (64%), were inconclusive, 7 (32%) favored the surgical arm and 1 (5%) were in favor of the drug regimen according to our standard random-effects calculations).

#### *Results of RCTs according to journal of publication*

Of the 165 eligible RCTs (295 outcome assessments), 73 RCTs (133 assessments) were published in mostly surgical journals, 38 RCTs (69 assessments) in general journals, and 54 RCTs (93 assessments) in mostly non-surgical journals. Based on 95% confidence intervals for the assessments of RCTs published in mostly surgical journals, 40/133 (30%) were in favor of surgery, 14/133 (11%) were in favor of drugs, and 79/133 (59%) were inconclusive. The respective numbers for the assessments of RCTs published in general journals were 27/69 (39%), 5/69 (7%), and 37/69 (53%); and for the assessments of RCTs published in mostly non-surgical journals they were 22/93 (24%), 15/93 (16%), and 56 (60%), respectively. The proportion of RCTs favoring surgery was not significantly higher in mostly surgical journals (30%) compared to other journals (39% and 24% for general and non-surgical journals respectively) ( $p=0.18$  by Fisher's exact test).

## Discussion

### *Main findings*

In a subset of Cochrane reviews that aimed to compare surgery to drugs we found that only 1 in 5 systematic reviews that had shown interest in such comparisons eventually found data from any RCTs for comparisons of the two modes of interventions. Furthermore, the majority of the comparisons where RCTs of surgery versus drugs had inconclusive results, few studies per meta-analytical outcome (30% with 3 or more studies), and also had low or very low strength of the evidence on GRADE assessments, and many trials had high risk of performance and detection bias.

Anal fissure was the only disease in our sample that had high GRADE evidence and a direction of effect indicating that one intervention (sphincterotomy) was more effective. Consequently, in the vast majority of cases where surgical and pharmaceutical interventions are available for treatment, an evidence-based decision in the clinic is difficult. Our secondary *post hoc* analysis of the type of journal where the eligible RCTs were published showed that results published in surgical journals were not necessarily more prone to favor the surgical arm of an RCT over the pharmaceutical arm.

### *Strengths*

This study covers the entire Cochrane database which is considered a high-quality comprehensive collection of systematic reviews. Cochrane reviews tend to address questions typically asked in routine clinical practice and underpin many clinical guideline recommendations, making this sample all the more relevant to everyday practice [56]. Another

1  
2  
3 strength of this study is that all surgical specialties were included. This is, therefore, to our  
4 knowledge the first project aiming to assess the extent of comparative evidence for surgery  
5 versus pharmacotherapy for a diverse spectrum of diseases.  
6  
7  
8  
9  
10

### 11 *Limitations*

12  
13  
14 Our analysis has several limitations. First, our pre-defined inclusion criteria excluded non-  
15 pharmacological medical interventions. Several comparisons may be found in the literature  
16 where surgery is compared against non-surgical non-pharmacological medical interventions,  
17 such as CPAP or radiotherapy. We also excluded endovascular and endoscopic procedures since  
18 they may be performed by surgical and medical specialists. These eligibility choices aimed to  
19 achieve some homogeneity in a project that is by definition already very heterogeneous. The use  
20 of an algorithm to filter out papers with no mention of the word surgery as well as the search  
21 strategy itself may have led to us missing reviews that discuss a particular surgical procedure but  
22 never explicitly mention the word surgery but merely the name of the intervention.  
23  
24  
25  
26  
27  
28  
29  
30  
31  
32  
33  
34  
35  
36  
37

38 Second, we focused exclusively on RCTs, but other types of evidence, e.g., non-randomized  
39 controlled trials, or uncontrolled clinical trials may also exist and sometimes their results may be  
40 compelling enough to deem a randomized study unnecessary. Such unquestionable superiority in  
41 the absence of randomized evidence is however unlikely [57]. Efforts such as IDEAL [8] have  
42 laid out much of the groundwork for performing RCTs in surgical research, yet a dearth of RCTs  
43 in the surgical realm of research persists to this day.  
44  
45  
46  
47  
48  
49  
50  
51  
52  
53  
54  
55  
56  
57  
58  
59  
60



1  
2  
3 Third, only one database (Cochrane Database of Systematic Reviews) was used for this study,  
4 and we did not examine non-Cochrane meta-analyses published as journal articles. While the  
5 database aims to be all-inclusive, there are still some topics in medical and surgical care that  
6 have not been covered by Cochrane reviews.  
7  
8  
9  
10  
11  
12

13  
14 However, the Cochrane database is more meticulous in describing its methods and it will  
15 routinely publish systematic reviews that have found no eligible articles, while this is unlikely in  
16 systematic reviews published in traditional journals. Therefore, including systematic reviews  
17 from journals may have distorted the picture and also caused a problem of overlapping  
18 systematic reviews. Moreover, we did not assess the methodological rigor or reporting quality of  
19 the Cochrane systematic reviews[58], as this was not the focus of our study. Cochrane systematic  
20 reviews score very highly in standard tools like AMSTAR[59], both because they are very  
21 meticulous and also because AMSTAR and AMSTAR-2 were developed with inspiration from  
22 the Cochrane Handbook.  
23  
24  
25  
26  
27  
28  
29  
30  
31  
32  
33  
34  
35  
36  
37

38 Fourth, it is possible that within the same disease, subgroups of patients may be eligible only for  
39 medical or only for surgical treatment, or that one or the other approach is much better only for  
40 specific subgroups. With the dearth of evidence we found for the overall analysis, identification  
41 of such subgroup effects would be unlikely and error-prone.  
42  
43  
44  
45  
46  
47  
48

#### 49 *Context of these findings*

50  
51 Sequestration between different disciplines and specialties[60] may lead to isolation of  
52 specialists which use different tools, and this may lead to a lack of comparisons of the treatments  
53  
54  
55  
56  
57

1  
2  
3 that each specialty uses. Each specialty may have its own community, journals, meetings, and  
4  
5 research agenda, limiting communication between different specialists even though they may be  
6  
7 dealing with the same disease from different angles and with different therapeutic sets. This lack  
8  
9 of communication may also be due to differences in mentorship and the trend of sub-  
10  
11 specialization in medical training separating clinicians and their practices even further [61], or to  
12  
13 differing incentive structures.  
14  
15

16  
17  
18  
19 Prior literature comparing surgical and medical interventions has assessed specific treatments,  
20  
21 such as that for basal cell carcinoma[60], and demonstrated that sequestration was prominent.  
22  
23 Despite a large number of trials, almost all of them compared medical interventions among  
24  
25 themselves, or surgical interventions among themselves, rather than comparing between these  
26  
27 two groups of treatment even though both groups of treatment could have been used. Our work  
28  
29 shows that this issue of sequestration is widespread in surgical vs. pharmaceutical interventions,  
30  
31 and that even where comparisons exist, there are too few, as well as often biased trials.  
32  
33  
34  
35  
36  
37

### 38 **Conclusion**

39  
40 This study suggests that comparisons of pharmaceutical and surgical interventions are infrequent.  
41  
42 The available comparisons have very few included studies which makes heterogeneity, and bias  
43  
44 hard to quantify and may yield spurious results with the normality assumptions underpinning  
45  
46 common frequentist meta-analytical approaches[62]. That is, even for the comparisons that have  
47  
48 been retrieved the evidence is not sufficient.  
49  
50  
51  
52  
53  
54  
55  
56  
57

1  
2  
3 Even accepting the difficulties in performing RCTs involving surgical interventions, our results  
4 still indicate a need for more comparative effectiveness research and for improved  
5  
6 communication between surgical and medical specialties to bridge this gap in evidence. There  
7  
8 are, of course, barriers to this. Head-to-head comparisons of treatments are often disfavored by  
9  
10 manufacturers leery of jeopardizing their product against that of a competitor [63,64], and  
11  
12 incentives unfortunately exist for both surgical and medical practitioners to promote treatments  
13  
14 they are able to offer. Moving forward, both medical and surgical professional societies should  
15  
16 collaborate to design fair and unbiased trials, and funders should also keep such research on their  
17  
18 radars to try and overcome these structural obstacles.  
19  
20  
21  
22  
23  
24  
25

### 26 *Future research*

27  
28 Future clinical research should try to expand the scope, volume, and methodological rigor of  
29  
30 comparative evidence on surgical versus medical interventions. This work should involve both  
31  
32 surgical and medical specialists and should also incorporate patient preferences. Long-term  
33  
34 patient-centered outcomes, including both benefits and harms should become available to put  
35  
36 surgical and medical practices into proper perspective.  
37  
38  
39  
40  
41  
42  
43  
44  
45  
46  
47  
48  
49  
50  
51  
52  
53  
54  
55  
56  
57  
58  
59  
60

Figure 1. PRISMA study selection flowchart

Table 1. Eligible comparisons of surgical versus medical interventions

| Surgical arm                                                        | Drug arm                                                    | Disease                                          | No. of outcomes (studies) |
|---------------------------------------------------------------------|-------------------------------------------------------------|--------------------------------------------------|---------------------------|
| Cardiac surgery                                                     |                                                             |                                                  |                           |
| Transmyocardial lazer revascularization                             | Continued medication                                        | Refractory angina                                | 3 (7,7,6)                 |
| Surgical closure                                                    | IV indomethacin                                             | Patent ductus arteriosus                         | 1 (1)                     |
| Dermatology                                                         |                                                             |                                                  |                           |
| Surgical excision                                                   | Imiquimod                                                   | BCC                                              | 4 (1,1,1,1)               |
| Surgical excision                                                   | MAL-PDT                                                     | BCC                                              | 3 (1,2,2)                 |
| Surgical excision                                                   | ALA-PDT                                                     | BCC                                              | 2 (1,1)                   |
| General surgery                                                     |                                                             |                                                  |                           |
| Lateral internal sphincterotomy                                     | Medical therapy (mainly GTN Isosorbide dinitrate and Botox) | Anal fissure                                     | 1 (15)                    |
| Pancreatic resection                                                | Chemoradiotherapy                                           | Pancreatic cancer                                | 1 (2)                     |
| Oesophagectomy                                                      | Chemoradiotherapy and/or radiotherapy                       | Oesophageal cancer                               | 5 (5,3,1,1,1)             |
| Laparoscopic fundoplication                                         | Protein pump inhibitors                                     | GERD                                             | 5 (3,3,4,3,2)             |
| Surgery                                                             | Tamoxifen                                                   | Primary breast cancer                            | 1 (3)                     |
| Neurosurgery                                                        |                                                             |                                                  |                           |
| Decompressive surgery                                               | Prednisolone                                                | Leprosy                                          | 4 (1,1,1,1)               |
| Epilepsy surgery                                                    | Continued antiepileptic drugs                               | Epilepsy                                         | 2 (2,1)                   |
| Decompressive craniectomy                                           | Medical treatment (including barbiturates)                  | High ICP in closed TBI                           | 2 (3,3)                   |
| Surgical decompression                                              | Osmotic agents, blood pressure control, and glucose control | Cerebral oedema in acute ischaemic stroke        | 1 (3)                     |
| Surgical decompression                                              | Dexamethasone, antihypertensives and intermittent diuresis  | Primary supratentorial intracerebral haemorrhage | 1 (9)                     |
| Obstetrics and gynaecology                                          |                                                             |                                                  |                           |
| Suction aspiration                                                  | Vaginal suppositories or im inj. of 9-methylene-PGE2        | Abortion                                         | 3 (2,2,1)                 |
| Suction aspiration                                                  | Misoprostol                                                 | Abortion                                         | 2 (22,9)                  |
| Suction aspiration                                                  | Vaginal or oral misoprostol                                 | Abortion                                         | 3 (15,13,5)               |
| Suction aspiration                                                  | Misoprostol and mifepristone                                | Abortion                                         | 2 (2,1)                   |
| Dilatation and curettage                                            | Misoprostol                                                 | Abortion                                         | 2 (1,2)                   |
| Dilation and evacuation                                             | Misoprostol                                                 | Abortion                                         | 1 (1,1)                   |
| Laparoscopic ovarian drilling                                       | Medical ovulation induction                                 | Infertility due to PCOS                          | 2 (9,14)                  |
| Laparoscopic ovarian drilling                                       | Letrozele                                                   | Infertility due to PCOS                          | 2 (3,1)                   |
| Laparoscopic ovarian drilling                                       | Gonadotropins                                               | PCOS                                             | 2 (1,1)                   |
| Laparoscopic ovarian drilling                                       | Metformin, clomiphene                                       | PCOS                                             | 1 (2)                     |
| Laparoscopic ovarian drilling                                       | Letrozele                                                   | PCOS                                             | 1 (1)                     |
| Laparoscopic ovarian drilling                                       | Metformin, letrozele                                        | PCOS                                             | 1 (1)                     |
| Laparoscopic ovarian drilling                                       | Metformin                                                   | PCOS                                             | 2 (2,1)                   |
| Transcervical resection of endometrium using rollerball coagulation | Hormone therapy or antifibrinolytic                         | Heavy menstrual bleeding                         | 7 (1,1,1,1,1,1,1)         |
| Ophthalmology                                                       |                                                             |                                                  |                           |

|                                                  |                                                                         |                               |               |
|--------------------------------------------------|-------------------------------------------------------------------------|-------------------------------|---------------|
| Amniotic membrane transplantation and medication | Lubrication, antibiotics, and pressure lowering medication              | Acute ocular burns            | 1 (1)         |
| Laser surgery                                    | intravitreal anti-VEGF                                                  | Pathological myopia           | 2 (1,1)       |
| iStent                                           | Latanoprost/timolol                                                     | Open angle glaucoma           | 1 (2)         |
| Argon laser trabeculoplasty                      | IOP reducing medication                                                 | Open angle glaucoma           | 3 (3,2,2)     |
| Surgical correction                              | Botulinum toxin                                                         | Strabismus                    | 2 (2,1)       |
| Orthopaedic surgery                              |                                                                         |                               |               |
| Open section of the carpal ligament              | NSAID and splinting or corticosteroid injections                        | Carpal tunnel syndrome        | 1 (2)         |
| Open surgery                                     | Corticosteroid injection                                                | Trigger finger                | 1 (2)         |
| Decompressive surgery with or without fusion     | Epidural steroid injection                                              | Lumbar spinal stenosis        | 3 (1,1,1)     |
| Open unilateral sympathectomy (L2-4)             | IV prostanoid iloprost                                                  | Critical limb ischaemia       | 1 (1)         |
| Surgical rotator cuff repair                     | Non-operative treatment including corticosteroid injection and exercise | Rotator cuff tear             | 1 (1)         |
| Arthroscopic surgery                             | Sclerosing injection                                                    | Jumper's knee                 | 3 (1,1,1)     |
| Otolaryngology                                   |                                                                         |                               |               |
| Surgical orbital decompression                   | IV Methylprednisolone 1x3 followed by oral prednisolone                 | Thyroid eye disease           | 1 (1)         |
| Grommets (ventilation tubes)                     | Antibiotic prophylaxis                                                  | Recurrent acute otitis media  | 1 (2)         |
| Tonsillectomy or adenotonsillectomy              | Watchful waiting with or without analgesics and antibiotics             | Tonsillitis                   | 5 (5,4,5,2,2) |
| Thoracic surgery                                 |                                                                         |                               |               |
| Open thoracotomy                                 | Thoracostomy drainage (with fibrinolytics)                              | Pleural empyema               | 1 (1)         |
| VATS                                             | Thoracostomy drainage (with fibrinolytics)                              | Pleural empyema               | 1 (7)         |
| Urology                                          |                                                                         |                               |               |
| Surgical reimplantation of ureters               | Antibiotics                                                             | Primary vesicoureteric reflux | 1 (1)         |
| Vascular surgery                                 |                                                                         |                               |               |
| Carotid endarterectomy and Aspirin 325 mg daily  | Aspirin 325 mg daily                                                    | Asymptomatic carotid stenosis | 1 (2)         |
| Aspirin and carotid surgery                      | Aspirin                                                                 | Carotid stenosis              | 2 (3,3)       |
| Saphenofemoral disconnection                     | Therapeutic LMWH                                                        | Superficial thrombophlebitis  | 2 (1,1)       |
| Surgery including primary amputation             | Thrombolysis (w/ rt-Pa or urokinase)                                    | Acute limb ischaemia          | 1 (3)         |

### Abbreviations

BCC: basal cell carcinoma of the skin; GERD: Gastro-oesophageal reflux disease; GTN: glyceryl tri-nitrate; IOP: intra-ocular pressure; PCOS: polycystic ovarian syndrome; QOL: Quality of life

Table 2. Comparisons where the surgical treatment was superior to the drug treatment

| Surgical arm                                            | Drug arm                                                    | Disease                                          | Outcome                                                                                        | Treatment effect (95% CI)                   | GRADE assessment     |
|---------------------------------------------------------|-------------------------------------------------------------|--------------------------------------------------|------------------------------------------------------------------------------------------------|---------------------------------------------|----------------------|
| Transmyocardial laser revascularization                 | Continued medication                                        | Refractory angina                                | Angina reduction                                                                               | OR=4.63 (3.43-6.25)                         | Low                  |
| Surgical excision                                       | Imiquimod                                                   | BCC                                              | Recurrence (3 y)<br>Recurrence (5 y)                                                           | RR=0.1 (0.03-0.31)<br>RR=0.13 (0.05-0.36)   | Moderate<br>Moderate |
| Surgical excision                                       | MAL-PDT                                                     | BCC                                              | Recurrence (3 y)                                                                               | RR=0.04 (0-0.61)                            | Low                  |
| Surgical excision                                       | ALA-PDT                                                     | BCC                                              | Recurrence (3 y)<br>Recurrence (5 y)                                                           | RR=0.09 (0.02-0.38)<br>RR=0.08 (0.02-0.34)  | Moderate<br>Moderate |
| Laparoscopic fundoplication                             | Protein pump inhibitors                                     | GERD                                             | GORD-specific QOL (<1 y)                                                                       | SMD=0.58 (0.46-0.7)                         | Low                  |
| Lateral internal sphincterotomy                         | Medical therapy (mainly GTN and Botox)                      | Anal fissure                                     | Non-Healing (persistence or recurrence) 2 mo.                                                  | OR=0.11 (0.06-0.23)                         | High                 |
| Epilepsy surgery                                        | Continued antiepileptic drugs                               | Epilepsy                                         | Proportion (%) free from seizures (1 y)<br>Proportion free from all seizures incl. auras (1 y) | RR=9.78 (4.73-20.2)*<br>RR=15 (2.08-108.23) | Low<br>Very Low      |
| Surgical decompression                                  | Osmotic agents, blood pressure control, and glucose control | Cerebral oedema in acute ischaemic stroke        | Death at the end of follow-up                                                                  | OR=0.19 (0.09-0.37)                         |                      |
| Surgical decompression                                  | Dexamethasone, antihypertensives and intermittent diuresis  | Primary supratentorial intracerebral haemorrhage | Death or dependence at end of follow up                                                        | OR=0.71 (0.58-0.88)                         |                      |
| Suction aspiration                                      | Misoprostol                                                 | Abortion                                         | Complete miscarriage                                                                           | RR=1.11 (1.06-1.17)                         | Very Low             |
|                                                         |                                                             |                                                  | Complete miscarriage                                                                           | RR=1.04 (1.02-1.06)                         | Very Low             |
| Dilatation and curettage                                | Misoprostol                                                 | Abortion                                         | Complete miscarriage                                                                           | RR=1.18 (1.1-1.27)*                         | Very Low             |
| Dilatation and evacuation                               | Misoprostol                                                 | Abortion                                         | Combined major and minor complications                                                         | OR=0.12 (0.03-0.46)                         |                      |
| Laparoscopic ovarian drilling                           | Medical ovulation induction                                 | Infertility due to PCOS                          | Multiple pregnancy                                                                             | OR=0.34 (0.18-0.66)                         | Moderate             |
| Laparoscopic ovarian drilling                           | Gonadotropins                                               | PCOS                                             | Menstrual regularity at 6 mo.                                                                  | OR=19.2 (3.17-116)                          | Very Low             |
| Transcervical resection of endometrium using rollerball | Hormone therapy or antifibrinolytic                         | Heavy menstrual bleeding                         | Control of bleeding (cure or improvement to acceptable level) 4 mo.                            | RR=2.66 (1.94-3.64)                         | Moderate             |

|                                              |                                                             |                              |                                                                   |                            |          |
|----------------------------------------------|-------------------------------------------------------------|------------------------------|-------------------------------------------------------------------|----------------------------|----------|
| coagulation                                  |                                                             |                              | Control of bleeding (cure or improvement to acceptable level) 2 y | RR=1.29 (1.06-1.57)        | Low      |
|                                              |                                                             |                              | Overall satisfaction with treatment 4 mo.                         | RR=2.8 (1.96-3.99)         | Moderate |
|                                              |                                                             |                              | Overall satisfaction with treatment 2 y                           | RR=1.4 (1.13-1.74)         | Moderate |
|                                              |                                                             |                              | Adverse events at 4 months                                        | RR=0.26 (0.15-0.46)        | Moderate |
| Surgical correction                          | Botulinum toxin                                             | Strabismus                   | Improved ocular alignment > 10 dioptres, adults                   | RR=2.63 (1.18-5.9)         | Low      |
| iStent                                       | Latanoprost/timolol                                         | Open angle glaucoma          | Proportion of participants who were drop-free 6-18 mo             | RR=125 (17.8-884)          | Very low |
| Argon laser trabeculoplasty                  | IOP reducing medication                                     | Open angle glaucoma          | Failure to control IOP                                            | RR=0.8 (0.71-0.91)         |          |
| Arthroscopic surgery                         | Sclerosing injection                                        | Jumper's knee                | Knee pain (0-100, 12 mo.)                                         | MD=-28.3 (-41.79- -14.81)  | Low      |
|                                              |                                                             |                              | Participant global assessment of success (1-100, 12 mo.)          | MD=33.9 (18.74- 49.06)     | Low      |
| Decompressive surgery with or without fusion | Epidural steroid injection                                  | Lumbar spinal stenosis       | Zurich claudication questionnaire (symptom evaluation) 6 w        | MD=-0.6 (-0.77- -0.43)     | Low      |
| Open unilateral sympathectomy (L2-4)         | IV prostanoid iloprost                                      |                              | Complete ulcer healing w/o rest pain or major amputation (24 w)   | RR=1.76 (1.35-2.29)        | Low      |
| Grommets (ventilation tubes)                 | Antibiotic prophylaxis                                      | Recurrent acute otitis media | Proportion of patients who have no recurrences (6 mo.)            | RR=1.68 (1.07-2.65)*       | Very Low |
| Tonsillectomy or adenotonsillectomy          | Watchful waiting with or without analgesics and antibiotics | Tonsillitis                  | Episodes of sore throat of any severity (children)                | MD=-0.56 (-1.04- -0.07)*   | Moderate |
|                                              |                                                             |                              | Sore throat days (children)                                       | MD=-5.13 (-8.03- -2.2)*    | Moderate |
|                                              |                                                             |                              | Episodes of sore throat of any severity (adults)                  | -MD=3.61 (-7.92- -0.7)*    | Moderate |
|                                              |                                                             |                              | Sore throat days (adults)                                         | MD=-10.64 (-15.52- -5.76)* | Moderate |
| Aspirin and carotid surgery                  | Aspirin                                                     | Carotid stenosis             | Any stroke or operative death                                     | RR=0.85 (0.77-0.95)*       | Moderate |

\*our re-analysis using a random effects meta-analysis model shows that the 95% confidence interval includes the null (results are inconclusive)

RR: risk ratio; OR: odds ratio; HR: hazard ratio; MD: mean difference; SMD: standardized mean difference; BCC: basal cell carcinoma of the skin; GERD: Gastro-oesophageal reflux disease; GNT: glyceryl trinitrate; IOP: intra-ocular pressure; PCOS: polycystic ovarian syndrome; QOL: Quality of life

Table 3. Comparisons where the drug treatment was superior to the surgical treatment

| Surgical arm                                     | Drug arm                                                    | Disease                       | Outcome                                                                            | Treatment effect (95% CI) | GRADE assessment |
|--------------------------------------------------|-------------------------------------------------------------|-------------------------------|------------------------------------------------------------------------------------|---------------------------|------------------|
| Surgical excision                                | Imiquimod                                                   | BCC                           | Observer-rated good/excellent cosmetic outcome                                     | RR=0.59 (0.47-0.74)       | Low              |
| Surgical excision                                | MAL-PDT                                                     | BCC                           | Observer-rated good/excellent cosmetic outcome                                     | RR=0.85 (0.79-0.92)*      | Moderate         |
| Surgical excision                                | MAL-PDT                                                     | BCC                           | Patient-rated good/excellent cosmetic outcome                                      | RR=0.53 (0.44-0.65)*      | Moderate         |
| Oesophagectomy                                   | Chemoradiotherapy and/or radiotherapy                       | Oesophageal cancer            | Serious adverse event (3 months)                                                   | RR=1.73 (1.11-2.67)*      | Very Low         |
|                                                  |                                                             |                               | Short-term health-related QOL                                                      | MD=0.93 (0.24-1.62)       | Very Low         |
| Laparoscopic fundoplication                      | Protein pump inhibitors                                     | GERD                          | Serious adverse events                                                             | RR=1.46 (1.01-2.11)       | Very Low         |
| Pancreatic resection                             | Chemoradiotherapy                                           | Pancreatic cancer             | Overall mortality (5 y)                                                            | HR=2.63 (1.72-4)*         | Very Low         |
| Laparoscopic ovarian drilling                    | Medical ovulation induction                                 | Infertility due to PCOS       | Live birth                                                                         | OR=0.71 (0.54-0.92)       | Low              |
| Suction aspiration                               | Vaginal or oral misoprostol                                 | Abortion                      | Surgical evacuation                                                                | RR=20 (9.1-50)            | Very Low         |
| Laser surgery                                    | intravitreal anti-VEGF                                      | Pathological myopia           | Change in best corrected visual acuity                                             | MD=0.22 (0.01-0.43)*      | Low              |
| Amniotic membrane transplantation and medication | Lubrication, Antibiotics and Pressure lowering medication   | Acute ocular burns            | Visual acuity at final follow-up                                                   | MD=-0.83 (-1.32- -0.34)   | Very Low         |
| Decompressive surgery with or without fusion     | Epidural steroid injection                                  | Lumbar spinal stenosis        | Oswestry Disability index 6 w                                                      | MD=5.7 (0.57-10.83)       | Low              |
|                                                  |                                                             |                               | Pain intensity (VAS) 6 w                                                           | MD=2.4 (1.92-2.88)        | Low              |
| Tonsillectomy or adenotonsillectomy              | Watchful waiting with or without analgesics and antibiotics | Tonsillitis                   | Episodes of moderately or severely sore throat (children)                          | MD=0.62 (0.22-1.03)*      | Low              |
| Carotid endarterectomy and Aspirin 325 mg daily  | Aspirin 325 mg daily                                        | Asymptomatic carotid stenosis | Perioperative stroke or death, or stroke of any territory or type during follow up | RR=6.49 (2.53-16.61)      |                  |

\*our re-analysis using a random effects meta-analysis model shows that the 95% confidence interval includes the null (results are inconclusive)

RR: risk ratio; OR: odds ratio; HR: hazard ratio; MD: mean difference; BCC: basal cell carcinoma of the skin; GERD: Gastro-oesophageal reflux disease; PCOS: polycystic ovarian syndrome



1  
2  
3  
4  
5  
6  
7  
8  
9  
10  
11  
12  
13  
14  
15  
16  
17  
18  
19  
20  
21  
22  
23  
24  
25  
26  
27  
28  
29  
30  
31  
32  
33  
34  
35  
36  
37  
38  
39  
40  
41  
42  
43  
44  
45  
46  
47  
48  
49  
50  
51  
52  
53  
54  
55  
56  
57  
58  
59  
60

For peer review only

Table 4. GRADE assessment across specialties

| Specialty                 | Very Low | Low    | Moderate | High   | None available |
|---------------------------|----------|--------|----------|--------|----------------|
| Cardiac surgery           | 0 (0)    | 1 (25) | 0 (0)    | 2 (50) | 1 (25)         |
| Dermatology               | 0 (0)    | 3 (33) | 6 (67)   | 0 (0)  | 0 (0)          |
| General surgery           | 9 (69)   | 3 (23) | 0 (0)    | 1 (8)  | 0 (0)          |
| Neurosurgery              | 5 (50)   | 2 (20) | 1 (10)   | 0 (0)  | 2 (20)         |
| Obstetrics and gynecology | 14 (45)  | 4 (13) | 7 (23)   | 1 (3)  | 5 (16)         |
| Ophthalmology             | 2 (20)   | 5 (50) | 0 (0)    | 0 (0)  | 3 (30)         |
| Orthopaedic surgery       | 2 (20)   | 6 (60) | 1 (10)   | 0 (0)  | 1 (10)         |
| Otolaryngology            | 1 (14)   | 1 (14) | 4 (57)   | 0 (0)  | 1 (14)         |
| Thoracic surgery          | 0 (0)    | 1 (50) | 1 (50)   | 0 (0)  | 0 (0)          |
| Urology                   | 0 (0)    | 0 (0)  | 0 (0)    | 0 (0)  | 1 (100)        |
| Vascular surgery          | 0 (0)    | 1 (17) | 2 (33)   | 0 (0)  | 3 (50)         |

## References

- 1 Howick J, Koletsi D, Ioannidis JPA, *et al*. Most healthcare interventions tested in Cochrane Reviews are not effective according to high quality evidence: a systematic review and meta-analysis. *J Clin Epidemiol*. 2022;S0895-4356(22)00100-7.
- 2 Ergina PL, Cook JA, Blazeby JM, *et al*. Challenges in evaluating surgical innovation. *The Lancet*. 2009;374:1097–104.
- 3 Maruthappu M, Gilbert BJ, El-Harasis MA, *et al*. The influence of volume and experience on individual surgical performance: a systematic review. *Ann Surg*. 2015;261:642–7.
- 4 Martling A, Cedermark B, Johansson H, *et al*. The surgeon as a prognostic factor after the introduction of total mesorectal excision in the treatment of rectal cancer. *British Journal of Surgery*. 2002;89:1008–13.
- 5 McGrath PD. Relation Between Operator and Hospital Volume and Outcomes Following Percutaneous Coronary Interventions in the Era of the Coronary Stent. *JAMA*. 2000;284:3139.
- 6 Gelijns AC, Ascheim DD, Parides MK, *et al*. Randomized trials in surgery. *Surgery*. 2009;145:581–7.
- 7 Barkun JS, Aronson JK, Feldman LS, *et al*. Evaluation and stages of surgical innovations. *Lancet*. 2009;374:1089–96.
- 8 McCulloch P, Altman DG, Campbell WB, *et al*. No surgical innovation without evaluation: the IDEAL recommendations. *Lancet*. 2009;374:1105–12.
- 9 Janiaud P, Agarwal A, Tzoulaki I, *et al*. Validity of observational evidence on putative risk and protective factors: appraisal of 3744 meta-analyses on 57 topics. *BMC Med*. 2021;19:157.
- 10 Belbasis L, Bellou V, Ioannidis JPA. Conducting umbrella reviews. *bmjmed*. 2022;1:e000071.
- 11 Chapter V: Overviews of Reviews. <https://training.cochrane.org/handbook/current/chapter-v> (accessed 7 November 2023)
- 12 Page MJ, McKenzie JE, Bossuyt PM, *et al*. The PRISMA 2020 statement: an updated guideline for reporting systematic reviews. *BMJ*. 2021;n71.
- 13 [Dataset] Zavalis E, Saraswathula A, Rameau A, *et al*. Availability of evidence and comparative effectiveness for surgical versus drug interventions: an overview of systematic reviews. 2023. <https://doi.org/10.17605/OSF.IO/RK7HU>
- 14 Balshem H, Helfand M, Schünemann HJ, *et al*. GRADE guidelines: 3. Rating the quality of evidence. *Journal of Clinical Epidemiology*. 2011;64:401–6.

- 15 Hartung J, Knapp G. A refined method for the meta-analysis of controlled clinical trials with binary outcome. *Stat Med*. 2001;20:3875–89.
- 16 IntHout J, Ioannidis JPA, Borm GF. The Hartung-Knapp-Sidik-Jonkman method for random effects meta-analysis is straightforward and considerably outperforms the standard DerSimonian-Laird method. *BMC Med Res Methodol*. 2014;14:25.
- 17 Weber F, Knapp G, Ickstadt K, *et al*. Zero-cell corrections in random-effects meta-analyses. *Res Syn Meth*. 2020;11:913–9.
- 18 R: The R Project for Statistical Computing. <https://www.r-project.org/> (accessed 29 March 2022)
- 19 Ioannidis JPA. The Proposal to Lower *P* Value Thresholds to .005. *JAMA*. 2018;319:1429.
- 20 Stanley TD, Doucouliagos H, Ioannidis JPA, *et al*. Detecting publication selection bias through excess statistical significance. *Research Synthesis Methods*. 2021;12:776–95.
- 21 Viechtbauer W. Conducting Meta-Analyses in *R* with the **metafor** Package. *J Stat Soft*. 2010;36. doi: 10.18637/jss.v036.i03
- 22 Phelps PO, Abariga SA, Cowling BJ, *et al*. Antimetabolites as an adjunct to dacryocystorhinostomy for nasolacrimal duct obstruction. *Cochrane Database Syst Rev*. 2020;4:CD012309.
- 23 Rees K, Beranek-Stanley M, Burke M, *et al*. Hypothermia to reduce neurological damage following coronary artery bypass surgery. *Cochrane Database Syst Rev*. 2001;CD002138.
- 24 Hoare BJ, Wallen MA, Imms C, *et al*. Botulinum toxin A as an adjunct to treatment in the management of the upper limb in children with spastic cerebral palsy (UPDATE). *Cochrane Database Syst Rev*. 2010;2010:CD003469.
- 25 Shylasree TS, Bryant A, Howells RE. Chemoradiation for advanced primary vulval cancer. *Cochrane Database Syst Rev*. 2011;2011:CD003752.
- 26 Lansbury L, Leonardi-Bee J, Perkins W, *et al*. Interventions for non-metastatic squamous cell carcinoma of the skin. *Cochrane Database Syst Rev*. 2010;CD007869.
- 27 Moreno G, Corbalán J, Peñaloza B, *et al*. Topical corticosteroids for treating phimosis in boys. *Cochrane Database Syst Rev*. 2014;CD008973.
- 28 Mitra S, Scrivens A, von Kursell AM, *et al*. Early treatment versus expectant management of hemodynamically significant patent ductus arteriosus for preterm infants. *Cochrane Database Syst Rev*. 2020;12:CD013278.
- 29 Flower A, Liu JP, Lewith G, *et al*. Chinese herbal medicine for endometriosis. *Cochrane Database Syst Rev*. 2012;CD006568.

- 1  
2  
3 30 Görk AS, Ehrenkranz RA, Bracken MB. Continuous infusion versus intermittent bolus doses  
4 of indomethacin for patent ductus arteriosus closure in symptomatic preterm infants.  
5 *Cochrane Database Syst Rev.* 2008;2008:CD006071.  
6  
7 31 Zhao J-G, Wang J, Huang W-J, *et al.* Interventions for treating simple bone cysts in the long  
8 bones of children. *Cochrane Database Syst Rev.* 2017;2:CD010847.  
9  
10 32 Bettany-Saltikov J, Weiss H-R, Chockalingam N, *et al.* Surgical versus non-surgical  
11 interventions in people with adolescent idiopathic scoliosis. *Cochrane Database Syst Rev.*  
12 2015;CD010663.  
13  
14 33 Kang D, Han J, Neuberger MM, *et al.* Transurethral radiofrequency collagen denaturation  
15 for the treatment of women with urinary incontinence. *Cochrane Database Syst Rev.*  
16 2015;CD010217.  
17  
18 34 Colquitt JL, Pickett K, Loveman E, *et al.* Surgery for weight loss in adults. *Cochrane*  
19 *Database Syst Rev.* 2014;CD003641.  
20  
21 35 Palmer JS, Monk AP, Hopewell S, *et al.* Surgical interventions for symptomatic mild to  
22 moderate knee osteoarthritis. *Cochrane Database Syst Rev.* 2019;7:CD012128.  
23  
24 36 Laupattarakasem W, Laopaiboon M, Laupattarakasem P, *et al.* Arthroscopic debridement for  
25 knee osteoarthritis. *Cochrane Database Syst Rev.* 2008;CD005118.  
26  
27 37 Liu JP, Yang H, Xia Y, *et al.* Herbal preparations for uterine fibroids. *Cochrane Database*  
28 *Syst Rev.* 2013;CD005292.  
29  
30 38 Cirocchi R, Trastulli S, Pressi E, *et al.* Non-operative management versus operative  
31 management in high-grade blunt hepatic injury. *Cochrane Database Syst Rev.*  
32 2015;2015:CD010989.  
33  
34 39 Page MJ, Massy-Westropp N, O'Connor D, *et al.* Splinting for carpal tunnel syndrome.  
35 *Cochrane Database Syst Rev.* 2012;2012:CD010003.  
36  
37 40 Nikolaidis I, Fouyas IP, Sandercock PA, *et al.* Surgery for cervical radiculopathy or  
38 myelopathy. *Cochrane Database Syst Rev.* 2010;2010:CD001466.  
39  
40 41 Cheuk DKL, Wong V, Wraige E, *et al.* Surgery for scoliosis in Duchenne muscular  
41 dystrophy. *Cochrane Database Syst Rev.* 2015;2015:CD005375.  
42  
43 42 Weitz M, Portz S, Laube GF, *et al.* Surgery versus non-surgical management for unilateral  
44 ureteric-pelvic junction obstruction in newborns and infants less than two years of age.  
45 *Cochrane Database Syst Rev.* 2016;7:CD010716.  
46  
47 43 Abraham A, Kumar S, Chaudhry S, *et al.* Surgical interventions for diaphyseal fractures of  
48 the radius and ulna in children. *Cochrane Database Syst Rev.* 2011;CD007907.  
49  
50  
51  
52  
53  
54  
55  
56  
57  
58  
59  
60

- 1  
2  
3 44 Chang MY, Coleman AL, Tseng VL, *et al.* Surgical interventions for vertical strabismus in  
4 superior oblique palsy. *Cochrane Database Syst Rev.* 2017;2017:CD012447.  
5  
6 45 Monk AP, Davies LJ, Hopewell S, *et al.* Surgical versus conservative interventions for  
7 treating anterior cruciate ligament injuries. *Cochrane Database Syst Rev.* 2016;4:CD011166.  
8  
9 46 Gosler MW, Testroote M, Morrenhof JW, *et al.* Surgical versus non-surgical interventions  
10 for treating humeral shaft fractures in adults. *Cochrane Database Syst Rev.*  
11 2012;1:CD008832.  
12  
13 47 Smith TO, Donell S, Song F, *et al.* Surgical versus non-surgical interventions for treating  
14 patellar dislocation. *Cochrane Database Syst Rev.* 2015;CD008106.  
15  
16 48 Abudou M, Chen X, Kong X, *et al.* Surgical versus non-surgical treatment for thoracolumbar  
17 burst fractures without neurological deficit. *Cochrane Database Syst Rev.* 2013;CD005079.  
18  
19 49 Cataneo AJM, Cataneo DC, de Oliveira FHS, *et al.* Surgical versus nonsurgical interventions  
20 for flail chest. *Cochrane Database Syst Rev.* 2015;2015:CD009919.  
21  
22 50 Khalil HS, Nunez DA. Functional endoscopic sinus surgery for chronic rhinosinusitis.  
23 *Cochrane Database Syst Rev.* 2006;CD004458.  
24  
25 51 Tóth M, Shah A, Hu K, *et al.* Endoscopic cyclophotocoagulation (ECP) for open angle  
26 glaucoma and primary angle closure. *Cochrane Database Syst Rev.* 2019;2:CD012741.  
27  
28 52 Fakhry F, Fokkenrood HJ, Spronk S, *et al.* Endovascular revascularisation versus  
29 conservative management for intermittent claudication. *Cochrane Database Syst Rev.*  
30 2018;3:CD010512.  
31  
32 53 Araujo ST, Moreno DH, Cacione DG. Percutaneous thrombectomy or ultrasound-accelerated  
33 thrombolysis for initial management of acute limb ischaemia. *Cochrane Database Syst Rev.*  
34 2022;1:CD013486.  
35  
36 54 Jenks S, Yeoh SE, Conway BR. Balloon angioplasty, with and without stenting, versus  
37 medical therapy for hypertensive patients with renal artery stenosis. *Cochrane Database Syst*  
38 *Rev.* 2014;2014:CD002944.  
39  
40 55 O'Connell NE, Wand BM, McAuley J, *et al.* Interventions for treating pain and disability in  
41 adults with complex regional pain syndrome. *Cochrane Database Syst Rev.*  
42 2013;2013:CD009416.  
43  
44 56 Korfitsen CB, Mikkelsen M-LK, Ussing A, *et al.* Usefulness of Cochrane Reviews in  
45 Clinical Guideline Development-A Survey of 585 Recommendations. *Int J Environ Res*  
46 *Public Health.* 2022;19:685.  
47  
48 57 Hozo I, Djulbegovic B, Parish AJ, *et al.* Identification of threshold for large (dramatic)  
49 effects that would obviate randomized trials is not possible. *Journal of Clinical*  
50 *Epidemiology.* 2022;145:101–11.  
51  
52  
53  
54  
55  
56  
57  
58  
59  
60

- 1  
2  
3 58 Kolaski K, Logan LR, Ioannidis JPA. Guidance to best tools and practices for systematic  
4 reviews. *Syst Rev.* 2023;12:96.  
5  
6  
7 59 Goldkuhle M, Narayan VM, Weigl A, *et al.* A systematic assessment of Cochrane reviews  
8 and systematic reviews published in high-impact medical journals related to cancer. *BMJ*  
9 *Open.* 2018;8:e020869.  
10  
11 60 Kim DD, Tang JY, Ioannidis JPA. Network geometry shows evidence sequestration for  
12 medical vs. surgical practices: treatments for basal cell carcinoma. *Journal of Clinical*  
13 *Epidemiology.* 2014;67:391–400.  
14  
15 61 Hirshman BR, Tang JA, Jones LA, *et al.* Impact of medical academic genealogy on  
16 publication patterns: An analysis of the literature for surgical resection in brain tumor  
17 patients: Medical Academic Genealogy. *Ann Neurol.* 2016;79:169–77.  
18  
19 62 Jackson D, White IR. When should meta-analysis avoid making hidden normality  
20 assumptions? *Biometrical Journal.* 2018;60:1040–58.  
21  
22  
23 63 Flacco ME, Manzoli L, Boccia S, *et al.* Head-to-head randomized trials are mostly industry  
24 sponsored and almost always favor the industry sponsor. *Journal of Clinical Epidemiology.*  
25 2015;68:811–20.  
26  
27 64 Lathyris DN, Patsopoulos NA, Salanti G, *et al.* Industry sponsorship and selection of  
28 comparators in randomized clinical trials. *European Journal of Clinical Investigation.*  
29 2010;40:172–82.  
30  
31  
32  
33  
34  
35  
36  
37  
38  
39  
40  
41  
42  
43  
44  
45  
46  
47  
48  
49  
50  
51  
52  
53  
54  
55  
56  
57  
58  
59  
60

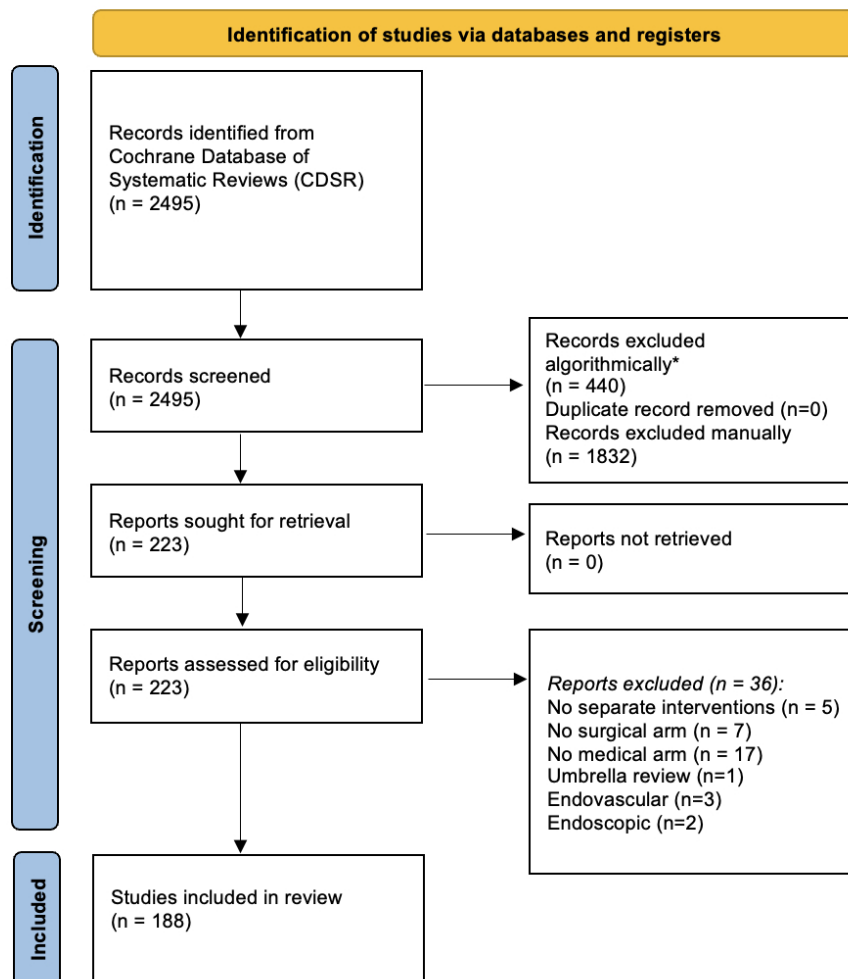

Figure 1. PRISMA study selection flowchart

219x227mm (118 x 118 DPI)



## Availability of evidence and comparative effectiveness for surgical versus drug interventions: an overview of systematic reviews

Emmanuel A. Zavalis<sup>1,2\*</sup>, Anaïs Rameau<sup>3\*</sup>, Anirudh Saraswathula<sup>4\*</sup>, Joachim Vist<sup>1</sup>, Ewoud Schuit<sup>5,6</sup>,

John P. A. Ioannidis<sup>2,7</sup>

\*co-first authors

1 Department of Learning Informatics Management and Ethics, Karolinska Institutet, Stockholm, Sweden

2 Meta-Research Innovation Center at Stanford (METRICS), Stanford University, Stanford, CA, USA

3 Sean Parker Institute for the Voice, Department of Otolaryngology–Head and Neck Surgery, Weill Cornell Medical College, New York, NY, USA

4 Department of Otolaryngology–Head and Neck Surgery, Johns Hopkins University School of Medicine, Baltimore, MD, USA

5 Julius Center, University Medical Center Utrecht, Utrecht University, Utrecht, the Netherlands

6 Cochrane Netherland, University Medical Center Utrecht, Utrecht University, Utrecht, the Netherlands

7 Stanford Prevention Research Center, Department of Medicine, and Department of Epidemiology and Population Health, Stanford University School of Medicine, Stanford, CA, USA

### Supplementary Materials - Index

#### Supplementary Data

Supplement 1 – List of included studies *pag. 2*

#### Supplementary Figures and Tables

Supplementary Table 1 *pag. 7*

Supplementary Table 2 *pag. 8*

## Supplementary Data

## Supplement 1 – List of included studies

| CDSR_ID       | Title                                                                                                                                                 | Specialty                 | Comparison available |
|---------------|-------------------------------------------------------------------------------------------------------------------------------------------------------|---------------------------|----------------------|
| CD005624.PUB4 | Interventions for great saphenous vein incompetence                                                                                                   | vascular surgery          | No                   |
| CD006931.PUB2 | Submacular surgery for choroidal neovascularisation secondary to age-related macular degeneration                                                     | ophthalmology             | No                   |
| CD002764.PUB2 | Surgery for the resolution of symptoms in malignant bowel obstruction in advanced gynaecological and gastrointestinal cancer                          | general surgery           | No                   |
| CD007119.PUB2 | Interventions for restoring patency of occluded central venous catheter lumens                                                                        | vascular surgery          | No                   |
| CD008509.PUB3 | Alpha-blockers as medical expulsive therapy for ureteral stones                                                                                       | urology                   | No                   |
| CD013085.PUB2 | Balneotherapy for chronic venous insufficiency                                                                                                        | vascular surgery          | No                   |
| CD009959.PUB2 | Interventions for the treatment of Frey's syndrome                                                                                                    | otolaryngology            | No                   |
| CD004008.PUB3 | Interventions for trachoma trichiasis                                                                                                                 | ophthalmology             | No                   |
| CD006134.PUB5 | Oral contraceptives for functional ovarian cysts                                                                                                      | obstetrics and gynecology | No                   |
| CD011650.PUB2 | Management of people with early- or very early-stage hepatocellular carcinoma                                                                         | general surgery           | No                   |
| CD001081.PUB4 | Carotid endarterectomy for symptomatic carotid stenosis                                                                                               | vascular surgery          | Yes                  |
| CD010244.PUB2 | Resection versus other treatments for locally advanced pancreatic cancer                                                                              | general surgery           | Yes                  |
| CD012432.PUB2 | Interventions for managing medication-related osteonecrosis of the jaw                                                                                | otolaryngology            | No                   |
| CD010260.PUB2 | Hysterectomy with radiotherapy or chemotherapy or both for women with locally advanced cervical cancer                                                | obstetrics and gynecology | No                   |
| CD012602.PUB2 | Methods for managing miscarriage: a network meta-analysis                                                                                             | obstetrics and gynecology | Yes                  |
| CD006983.PUB3 | Decompressive surgery for treating nerve damage in leprosy                                                                                            | neurosurgery              | Yes                  |
| CD009590.PUB2 | Endometriosis: an overview of Cochrane Reviews                                                                                                        | obstetrics and gynecology | No                   |
| CD005320.PUB2 | Operative and non-operative treatment options for dislocation of the hip following total hip arthroplasty                                             | orthopaedic surgery       | No                   |
| CD010349.PUB2 | Iodine-131-meta-iodobenzylguanidine therapy for patients with newly diagnosed high-risk neuroblastoma                                                 | neurosurgery              | No                   |
| CD010712      | Nonoperative treatment for lumbar spinal stenosis with neurogenic claudication                                                                        | orthopaedic surgery       | No                   |
| CD011478.PUB2 | Type II or type III radical hysterectomy compared to chemoradiotherapy as a primary intervention for stage IB2 cervical cancer                        | obstetrics and gynecology | No                   |
| CD002116.PUB2 | Drug treatment for faecal incontinence in adults                                                                                                      | general surgery           | No                   |
| CD005029.PUB2 | Treatment for ataxia in multiple sclerosis                                                                                                            | neurosurgery              | No                   |
| CD008107.PUB2 | Perioperative chemo(radio)therapy versus primary surgery for resectable adenocarcinoma of the stomach, gastroesophageal junction, and lower esophagus | general surgery           | No                   |
| CD008602.PUB4 | Interventions for congenital talipes equinovarus (clubfoot)                                                                                           | orthopaedic surgery       | No                   |
| CD004461.PUB3 | Interventions for recurrent idiopathic epistaxis (nosebleeds) in children                                                                             | otolaryngology            | No                   |
| CD006476.PUB3 | Management for intussusception in children                                                                                                            | general surgery           | No                   |
| CD009166.PUB2 | Cervical stitch (cerclage) for preventing preterm birth in multiple pregnancy                                                                         | obstetrics and gynecology | No                   |
| CD002221.PUB2 | Interventions for involutional lower lid entropion                                                                                                    | ophthalmology             | No                   |
| CD009379.PUB2 | Amniotic membrane transplantation for acute ocular burns                                                                                              | ophthalmology             | Yes                  |
| CD003296.PUB3 | Retinoids for preventing the progression of cervical intra-epithelial neoplasia                                                                       | obstetrics and gynecology | No                   |
| CD004917.PUB3 | Interventions for infantile esotropia                                                                                                                 | ophthalmology             | No                   |
| CD003431.PUB3 | Non surgical therapy for anal fissure                                                                                                                 | general surgery           | Yes                  |
| CD007340.PUB2 | Bariatric surgery for non-alcoholic steatohepatitis in obese patients                                                                                 | general surgery           | No                   |

| CDSR_ID       | Title                                                                                                                                                                   | Specialty                 | Comparison available |
|---------------|-------------------------------------------------------------------------------------------------------------------------------------------------------------------------|---------------------------|----------------------|
| CD001122.PUB5 | Laparoscopic ovarian drilling for ovulation induction in women with anovulatory polycystic ovary syndrome                                                               | obstetrics and gynecology | Yes                  |
| CD007156.PUB2 | Interventions for the management of oral submucous fibrosis                                                                                                             | otolaryngology            | No                   |
| CD012802.PUB2 | Ab interno supraciliary microstent surgery for open-angle glaucoma                                                                                                      | ophthalmology             | No                   |
| CD004399.PUB3 | Medical versus surgical interventions for open angle glaucoma                                                                                                           | ophthalmology             | No                   |
| CD009266.PUB2 | Non-steroidal antiandrogen monotherapy compared with luteinising hormone-releasing hormone agonists or surgical castration monotherapy for advanced prostate cancer     | urology                   | No                   |
| CD010273.PUB2 | Interventions for treating postpartum constipation                                                                                                                      | general surgery           | No                   |
| CD009366.PUB2 | Lumbar sympathectomy versus prostanoids for critical limb ischaemia due to non-reconstructable peripheral arterial disease                                              | orthopaedic surgery       | Yes                  |
| CD007060.PUB2 | Liver resection versus other treatments for neuroendocrine tumours in patients with resectable liver metastases                                                         | general surgery           | No                   |
| CD008088.PUB3 | Anti-TNF- $\alpha$ treatment for pelvic pain associated with endometriosis                                                                                              | obstetrics and gynecology | No                   |
| CD004982.PUB6 | Treatment for superficial thrombophlebitis of the leg                                                                                                                   | vascular surgery          | Yes                  |
| CD007939.PUB2 | Single herbal medicine for diabetic retinopathy                                                                                                                         | ophthalmology             | No                   |
| CD002000.PUB3 | Bypass surgery for chronic lower limb ischaemia                                                                                                                         | vascular surgery          | No                   |
| CD012017.PUB2 | Grommets (ventilation tubes) for recurrent acute otitis media in children                                                                                               | otolaryngology            | Yes                  |
| CD009968.PUB2 | Botulinum toxin for upper oesophageal sphincter dysfunction in neurological swallowing disorders                                                                        | general surgery           | No                   |
| CD004272.PUB3 | Surgery versus primary endocrine therapy for operable primary breast cancer in elderly women (70 years plus)                                                            | general surgery           | Yes                  |
| CD007118.PUB2 | Palliative cytoreductive surgery versus other palliative treatments in patients with unresectable liver metastases from gastro-entero-pancreatic neuroendocrine tumours | general surgery           | No                   |
| CD006714.PUB2 | Surgical versus medical methods for second trimester induced abortion                                                                                                   | obstetrics and gynecology | Yes                  |
| CD011174.PUB2 | Interventions for non-tubal ectopic pregnancy                                                                                                                           | obstetrics and gynecology | No                   |
| CD010541.PUB3 | Surgery for epilepsy                                                                                                                                                    | neurosurgery              | Yes                  |
| CD013034.PUB2 | Surgery for patellar tendinopathy (jumper's knee)                                                                                                                       | orthopaedic surgery       | Yes                  |
| CD007481.PUB3 | Chemical pleurodesis versus surgical intervention for persistent and recurrent pneumothoraces in cystic fibrosis                                                        | thoracic surgery          | No                   |
| CD003712.PUB3 | Transmyocardial laser revascularization versus medical therapy for refractory angina                                                                                    | cardiac surgery           | Yes                  |
| CD008997.PUB2 | Non-resection versus resection for an asymptomatic primary tumour in patients with unresectable Stage IV colorectal cancer                                              | general surgery           | No                   |
| CD005081.PUB3 | Medical and surgical treatment for ocular myasthenia                                                                                                                    | ophthalmology             | No                   |
| CD013099.PUB2 | Interventions for bacterial folliculitis and boils (furuncles and carbuncles)                                                                                           | general surgery           | No                   |
| CD011837.PUB2 | Medical and surgical interventions for the treatment of usual-type vulval intraepithelial neoplasia                                                                     | obstetrics and gynecology | No                   |
| CD003951.PUB3 | Surgical versus medical treatment with cyclooxygenase inhibitors for symptomatic patent ductus arteriosus in preterm infants                                            | cardiac surgery           | Yes                  |
| CD007261.PUB2 | Interventions for managing temporomandibular joint osteoarthritis                                                                                                       | orthopaedic surgery       | No                   |
| CD003193.PUB4 | Anticholinergic drugs versus non-drug active therapies for non-neurogenic overactive bladder syndrome in adults                                                         | urology                   | No                   |
| CD009493.PUB2 | N-acetylcarnosine (NAC) drops for age-related cataract                                                                                                                  | ophthalmology             | No                   |
| CD005198.PUB3 | Therapeutic interventions for Burkitt lymphoma in children                                                                                                              | otolaryngology            | No                   |
| CD004981.PUB4 | Treatment for femoral pseudoaneurysms                                                                                                                                   | vascular surgery          | No                   |
| CD003525.PUB2 | Surgery for lateral elbow pain                                                                                                                                          | orthopaedic surgery       | No                   |
| CD013006.PUB2 | Interventions for the management of obesity in people with bipolar disorder                                                                                             | general surgery           | No                   |
| CD013404.PUB2 | Surgical interventions for treating intracapsular hip fractures in older adults: a network meta-analysis                                                                | orthopaedic surgery       | No                   |
| CD011725.PUB2 | Indomethacin for intracranial hypertension secondary to severe traumatic brain injury in adults                                                                         | neurosurgery              | No                   |

| CDSR_ID       | Title                                                                                                                        | Specialty                 | Comparison available |
|---------------|------------------------------------------------------------------------------------------------------------------------------|---------------------------|----------------------|
| CD009526.PUB2 | Ovarian surgery for symptom relief in women with polycystic ovary syndrome                                                   | obstetrics and gynecology | Yes                  |
| CD003855.PUB3 | Surgery versus medical therapy for heavy menstrual bleeding                                                                  | obstetrics and gynecology | Yes                  |
| CD009505.PUB2 | Aromatase inhibitors for uterine fibroids                                                                                    | obstetrics and gynecology | No                   |
| CD003037.PUB2 | Medical versus surgical methods for first trimester termination of pregnancy                                                 | obstetrics and gynecology | Yes                  |
| CD011169.PUB2 | Selective oestrogen receptor modulators (SERMs) for endometriosis                                                            | obstetrics and gynecology | No                   |
| CD007924.PUB3 | Medical interventions for high-grade vulval intraepithelial neoplasia                                                        | obstetrics and gynecology | No                   |
| CD008111.PUB2 | Thymectomy for non-thymomatous myasthenia gravis                                                                             | thoracic surgery          | No                   |
| CD007223.PUB4 | Medical treatments for incomplete miscarriage                                                                                | obstetrics and gynecology | Yes                  |
| CD010308.PUB2 | Interventions for melanoma in situ, including lentigo maligna                                                                | general surgery           | No                   |
| CD007468.PUB4 | Surgical interventions for the early management of Bell's palsy                                                              | neurosurgery              | No                   |
| CD007792.PUB2 | Palliative surgery versus medical management for bowel obstruction in ovarian cancer                                         | general surgery           | No                   |
| CD008455.PUB2 | Interventions for treating bisphosphonate-related osteonecrosis of the jaw (BRONJ)                                           | orthopaedic surgery       | No                   |
| CD002115.PUB5 | Management of faecal incontinence and constipation in adults with central neurological diseases                              | general surgery           | No                   |
| CD006991.PUB2 | Surgical versus medical interventions for chronic rhinosinusitis with nasal polyps                                           | otolaryngology            | No                   |
| CD001496.PUB2 | Pharmacological and surgical interventions for the treatment of gastro-oesophageal reflux in adults and children with asthma | general surgery           | No                   |
| CD008571.PUB2 | Interventions for women with endometrioma prior to assisted reproductive technology                                          | obstetrics and gynecology | No                   |
| CD006544.PUB3 | Prostanoids for critical limb ischaemia                                                                                      | vascular surgery          | No                   |
| CD003435.PUB2 | Surgical decompression for cerebral oedema in acute ischaemic stroke                                                         | neurosurgery              | Yes                  |
| CD013325.PUB2 | Interventions for treating people with symptoms of bladder pain syndrome: a network meta-analysis                            | urology                   | No                   |
| CD001066.PUB3 | Interventions for varicose veins and leg oedema in pregnancy                                                                 | vascular surgery          | No                   |
| CD006388.PUB2 | Octreotide for the treatment of chylothorax in neonates                                                                      | thoracic surgery          | No                   |
| CD003658.PUB3 | Needling for encapsulated trabeculectomy filtering blebs                                                                     | ophthalmology             | No                   |
| CD006152.PUB2 | Decompressive surgery of lower limbs for symmetrical diabetic peripheral neuropathy                                          | orthopaedic surgery       | No                   |
| CD001896.PUB2 | Surgical interruption of pelvic nerve pathways for primary and secondary dysmenorrhoea                                       | obstetrics and gynecology | No                   |
| CD004699.PUB2 | Surgery for local and locally advanced non-small cell lung cancer                                                            | thoracic surgery          | No                   |
| CD002867      | Treatments for secondary postpartum haemorrhage                                                                              | obstetrics and gynecology | No                   |
| CD006373.PUB2 | Interventions for treating functional dysphonia in adults                                                                    | otolaryngology            | No                   |
| CD001541.PUB3 | Interventions for ingrowing toenails                                                                                         | general surgery           | No                   |
| CD013469.PUB2 | Surgical and medical interventions for abdominal aortic graft infections                                                     | vascular surgery          | No                   |
| CD001219      | Corticosteroids for the resolution of malignant bowel obstruction in advanced gynaecological and gastrointestinal cancer     | general surgery           | No                   |
| CD005304.PUB3 | Interventions for primary (intrinsic) tracheomalacia in children                                                             | thoracic surgery          | No                   |
| CD011498.PUB2 | Non-surgical versus surgical treatment for oesophageal cancer                                                                | general surgery           | Yes                  |
| CD002784.PUB3 | Surgery versus thrombolysis for initial management of acute limb ischaemia                                                   | vascular surgery          | Yes                  |
| CD006499.PUB4 | Botulinum toxin for the treatment of strabismus                                                                              | ophthalmology             | Yes                  |
| CD005024.PUB3 | Surgery for traumatic optic neuropathy                                                                                       | general surgery           | No                   |
| CD003243.PUB3 | Laparoscopic fundoplication surgery versus medical management for gastro-oesophageal reflux disease (GORD) in adults         | general surgery           | Yes                  |
| CD003118.PUB2 | Interventions for the treatment of Morton's neuroma                                                                          | orthopaedic surgery       | No                   |
| CD001001.PUB3 | Lung volume reduction surgery for diffuse emphysema                                                                          | thoracic surgery          | No                   |
| CD010784.PUB3 | Medical and surgical interventions for the treatment of urinary stones in children                                           | urology                   | No                   |

| CDSR_ID       | Title                                                                                                                                        | Specialty                 | Comparison available |
|---------------|----------------------------------------------------------------------------------------------------------------------------------------------|---------------------------|----------------------|
| CD000324.PUB2 | Interventions for tubal ectopic pregnancy                                                                                                    | obstetrics and gynecology | No                   |
| CD000526.PUB2 | Interventions for treating tuberculous pericarditis                                                                                          | cardiac surgery           | No                   |
| CD004156.PUB4 | Treatment for spasticity in amyotrophic lateral sclerosis/motor neuron disease                                                               | neurosurgery              | No                   |
| CD004159.PUB3 | Treatment for meralgia paraesthetica                                                                                                         | neurosurgery              | No                   |
| CD006797.PUB2 | Surgical resection versus non-surgical treatment for hepatic node positive patients with colorectal liver metastases                         | general surgery           | No                   |
| CD007510.PUB3 | Botulinum toxin for masseter hypertrophy                                                                                                     | otolaryngology            | No                   |
| CD011523.PUB2 | Medical versus surgical treatment for refractory or recurrent peptic ulcer                                                                   | general surgery           | No                   |
| CD001802.PUB3 | Tonsillectomy or adenotonsillectomy versus non-surgical treatment for chronic/recurrent acute tonsillitis                                    | otolaryngology            | Yes                  |
| CD007383.PUB3 | Surgical versus non-surgical management of abdominal injury                                                                                  | general surgery           | No                   |
| CD006981.PUB2 | Treatment for sialorrhea (excessive saliva) in people with motor neuron disease/amyotrophic lateral sclerosis                                | otolaryngology            | No                   |
| CD001829.PUB4 | Interventions for treating oral leukoplakia to prevent oral cancer                                                                           | otolaryngology            | No                   |
| CD001934.PUB2 | Surgical versus non-surgical interventions for vocal cord nodules                                                                            | otolaryngology            | No                   |
| CD003412.PUB3 | Interventions for basal cell carcinoma of the skin                                                                                           | dermatology               | Yes                  |
| CD003425.PUB4 | Splenectomy versus conservative management for acute sequestration crises in people with sickle cell disease                                 | general surgery           | No                   |
| CD003983.PUB3 | Decompressive craniectomy for the treatment of high intracranial pressure in closed traumatic brain injury                                   | neurosurgery              | Yes                  |
| CD004098.PUB2 | Levothyroxine or minimally invasive therapies for benign thyroid nodules                                                                     | general surgery           | No                   |
| CD004437.PUB6 | Thrombolytic therapy for pulmonary embolism                                                                                                  | cardiac surgery           | No                   |
| CD004927.PUB4 | Surgical management of functional bladder outlet obstruction in adults with neurogenic bladder dysfunction                                   | urology                   | No                   |
| CD005619.PUB3 | Subacromial decompression surgery for rotator cuff disease                                                                                   | orthopaedic surgery       | No                   |
| CD006032.PUB4 | Steroids for traumatic optic neuropathy                                                                                                      | ophthalmology             | No                   |
| CD006746.PUB4 | Laser peripheral iridoplasty for chronic angle closure                                                                                       | ophthalmology             | No                   |
| CD007281.PUB2 | Interventions for cutaneous Bowen's disease                                                                                                  | dermatology               | No                   |
| CD007404.PUB2 | Interventions for central giant cell granuloma (CGCG) of the jaws                                                                            | otolaryngology            | No                   |
| CD007535.PUB4 | Chinese herbal medicine for subfertile women with polycystic ovarian syndrome                                                                | obstetrics and gynecology | No                   |
| CD008280.PUB2 | Interventions for atrophic rhinitis                                                                                                          | otolaryngology            | No                   |
| CD009244.PUB2 | Interventions for anal canal intraepithelial neoplasia                                                                                       | general surgery           | No                   |
| CD010287.PUB3 | Aromatase inhibitors (letrozole) for subfertile women with polycystic ovary syndrome                                                         | obstetrics and gynecology | Yes                  |
| CD010651.PUB2 | Surgical versus non-surgical management for pleural empyema                                                                                  | thoracic surgery          | Yes                  |
| CD011160.PUB2 | Anti-vascular endothelial growth factor for choroidal neovascularisation in people with pathological myopia                                  | ophthalmology             | Yes                  |
| CD012742.PUB2 | Subconjunctival draining minimally-invasive glaucoma devices for medically uncontrolled glaucoma                                             | ophthalmology             | No                   |
| CD012743.PUB2 | Ab interno trabecular bypass surgery with iStent for open-angle glaucoma                                                                     | ophthalmology             | Yes                  |
| CD012834.PUB2 | Medical and surgical abortion for women living with HIV                                                                                      | obstetrics and gynecology | No                   |
| CD012879.PUB2 | Shoulder replacement surgery for osteoarthritis and rotator cuff tear arthropathy                                                            | orthopaedic surgery       | No                   |
| CD006131.PUB3 | Interventions for Mooren's ulcer                                                                                                             | dermatology               | No                   |
| CD007677.PUB4 | Pentoxifylline for the treatment of endometriosis-associated pain and infertility                                                            | obstetrics and gynecology | No                   |
| CD012740.PUB2 | Ab interno trabecular bypass surgery with Schlemm's canal microstent (Hydrus) for open angle glaucoma                                        | ophthalmology             | No                   |
| CD006151.PUB3 | Fundoplication versus postoperative medication for gastro-oesophageal reflux in children with neurological impairment undergoing gastrostomy | general surgery           | No                   |
| CD010081.PUB2 | Interventions for hidradenitis suppurativa                                                                                                   | dermatology               | No                   |
| CD007630.PUB2 | Surgical orbital decompression for thyroid eye disease                                                                                       | otolaryngology            | Yes                  |
| CD011165.PUB2 | Tonsillectomy or adenotonsillectomy versus non-surgical management for obstructive sleep-disordered breathing in children                    | otolaryngology            | No                   |

| CDSR_ID       | Title                                                                                                                                      | Specialty                 | Comparison available |
|---------------|--------------------------------------------------------------------------------------------------------------------------------------------|---------------------------|----------------------|
| CD005656.PUB3 | Intravitreal steroids for macular edema in diabetes                                                                                        | ophthalmology             | No                   |
| CD009860.PUB2 | Surgery for trigger finger                                                                                                                 | orthopaedic surgery       | Yes                  |
| CD013502      | Surgery for rotator cuff tears                                                                                                             | orthopaedic surgery       | Yes                  |
| CD002180      | Surgery versus non-surgical treatment for bronchiectasis                                                                                   | thoracic surgery          | No                   |
| CD010868.PUB2 | Interventions for dissociated vertical deviation                                                                                           | ophthalmology             | No                   |
| CD001408.PUB2 | Botulinum toxin type A in the treatment of lower limb spasticity in children with cerebral palsy                                           | orthopaedic surgery       | No                   |
| CD003919.PUB2 | Laser trabeculoplasty for open angle glaucoma                                                                                              | ophthalmology             | Yes                  |
| CD010312.PUB2 | Prostaglandins for management of retained placenta                                                                                         | obstetrics and gynecology | No                   |
| CD011693.PUB3 | Ab interno trabecular bypass surgery with Trabectome for open-angle glaucoma                                                               | ophthalmology             | No                   |
| CD008669.PUB3 | Tonsillectomy for periodic fever, aphthous stomatitis, pharyngitis and cervical adenitis syndrome (PFAPA)                                  | otolaryngology            | No                   |
| CD008128.PUB2 | Treatment of valvular heart disease during pregnancy for improving maternal and neonatal outcome                                           | cardiac surgery           | No                   |
| CD001923.PUB2 | Carotid endarterectomy for asymptomatic carotid stenosis                                                                                   | vascular surgery          | Yes                  |
| CD010960.PUB2 | Injection therapies for Achilles tendinopathy                                                                                              | orthopaedic surgery       | No                   |
| CD003738.PUB3 | Interventions for preventing posterior capsule opacification                                                                               | ophthalmology             | No                   |
| CD013000.PUB2 | Interventions for orbital lymphangioma                                                                                                     | otolaryngology            | No                   |
| CD008282      | Adenoidectomy for recurrent or chronic nasal symptoms in children                                                                          | otolaryngology            | No                   |
| CD003263.PUB5 | Interventions for vitiligo                                                                                                                 | dermatology               | No                   |
| CD008583.PUB3 | Ultrasound-guided transvaginal ovarian needle drilling for clomiphene-resistant polycystic ovarian syndrome in subfertile women            | obstetrics and gynecology | No                   |
| CD007810.PUB2 | Adenoidectomy for otitis media in children                                                                                                 | otolaryngology            | No                   |
| CD006181.PUB2 | Prophylactic surgical ligation of patent ductus arteriosus for prevention of mortality and morbidity in extremely low birth weight infants | cardiac surgery           | No                   |
| CD011917.PUB2 | Surgery for limited-stage small-cell lung cancer                                                                                           | thoracic surgery          | No                   |
| CD010264.PUB2 | Surgical versus non-surgical treatment for lumbar spinal stenosis                                                                          | orthopaedic surgery       | Yes                  |
| CD008732.PUB2 | Macular grid laser photocoagulation for branch retinal vein occlusion                                                                      | ophthalmology             | No                   |
| CD011680.PUB2 | Interventions for necrotizing soft tissue infections in adults                                                                             | general surgery           | No                   |
| CD001801.PUB3 | Grommets (ventilation tubes) for hearing loss associated with otitis media with effusion in children                                       | otolaryngology            | No                   |
| CD006205.PUB4 | Interventions for the treatment of oral and oropharyngeal cancers: surgical treatment                                                      | otolaryngology            | No                   |
| CD009245.PUB3 | Interventions for the treatment of Paget's disease of the vulva                                                                            | obstetrics and gynecology | No                   |
| CD012798.PUB3 | Interventions for treating distal intestinal obstruction syndrome (DIOS) in cystic fibrosis                                                | general surgery           | No                   |
| CD008089.PUB2 | Surgery for shoulder osteoarthritis                                                                                                        | orthopaedic surgery       | No                   |
| CD008497.PUB3 | Deep brain and cortical stimulation for epilepsy                                                                                           | neurosurgery              | No                   |
| CD004325.PUB2 | Surgical versus non-surgical treatment for acute anterior shoulder dislocation                                                             | orthopaedic surgery       | No                   |
| CD005048.PUB4 | Interventions for dysphagia in oesophageal cancer                                                                                          | general surgery           | No                   |
| CD000200.PUB2 | Surgery for primary supratentorial intracerebral haemorrhage                                                                               | neurosurgery              | Yes                  |
| CD011031.PUB3 | Laparoscopic surgery for endometriosis                                                                                                     | obstetrics and gynecology | No                   |
| CD010796.PUB2 | Surgery for treating hip impingement (femoroacetabular impingement)                                                                        | orthopaedic surgery       | No                   |
| CD006769.PUB2 | Interventions for late trabeculectomy bleb leak                                                                                            | ophthalmology             | No                   |
| CD001532.PUB5 | Interventions for primary vesicoureteric reflux                                                                                            | urology                   | Yes                  |
| CD008104.PUB2 | Interventions for treating osteochondral defects of the talus in adults                                                                    | orthopaedic surgery       | No                   |
| CD001552.PUB2 | Surgical versus non-surgical treatment for carpal tunnel syndrome                                                                          | orthopaedic surgery       | Yes                  |

1  
2  
3 **Supplementary Figures and Tables**  
4

5 Supplementary table 1. Reviews per specialty  
6

7

| 8 <b>Specialty</b>           | 9 <b>Total reviews</b> | 10 <b>Reviews with at least one comparison (%)</b> |
|------------------------------|------------------------|----------------------------------------------------|
| 11 Cardiac surgery           | 6                      | 2 (33)                                             |
| 12 Dermatology               | 5                      | 1 (20)                                             |
| 13 General surgery           | 35                     | 5 (14)                                             |
| 14 Neurosurgery              | 12                     | 5 (42)                                             |
| 15 Obstetrics and gynecology | 31                     | 8 (26)                                             |
| 16 Ophthalmology             | 25                     | 5 (20)                                             |
| 17 Orthopaedic surgery       | 23                     | 6 (26)                                             |
| 18 Otolaryngology            | 23                     | 3 (13)                                             |
| 19 Thoracic surgery          | 9                      | 1 (11)                                             |
| 20 Urology                   | 7                      | 1 (14)                                             |
| 21 Vascular surgery          | 12                     | 4 (33)                                             |

22  
23  
24  
25  
26  
27  
28  
29  
30  
31  
32  
33  
34  
35  
36  
37  
38  
39  
40  
41  
42  
43  
44  
45  
46  
47  
48  
49  
50  
51  
52  
53  
54  
55  
56  
57  
58  
59  
60

Supplementary Table 2. Inconclusive comparisons between surgery and drugs

| Surgical arm                            | Drug arm                                   | Disease                  | Outcome                                                            | Treatment effect (95% CI) | GRADE assessment |
|-----------------------------------------|--------------------------------------------|--------------------------|--------------------------------------------------------------------|---------------------------|------------------|
| Cardiac surgery                         |                                            |                          |                                                                    |                           |                  |
| Transmyocardial laser revascularization | Continued medication                       | Refractory angina        | Overall mortality                                                  | OR=1.12 (0.77-1.63)       | High             |
|                                         |                                            |                          | Postoperative mortality (30 d)                                     | OR=1.19 (0.63-2.24)       | High             |
| Surgical closure                        | IV indomethacin                            | Patent ductus arteriosus | Death before discharge                                             | RR=0.67 (0.34-1.31)       |                  |
| Dermatology                             |                                            |                          |                                                                    |                           |                  |
| Surgical excision                       | Imiquimod                                  | BCC                      | Patient-rated good/excellent cosmetic outcome                      | RR=1 (0.94-1.06)          | Low              |
| General surgery                         |                                            |                          |                                                                    |                           |                  |
| Surgery                                 | Tamoxifen                                  | Primary breast cancer    | Overall survival                                                   | HR=0.98 (0.81-1.2)        | Low              |
| Laparoscopic fundoplication             | Protein pump inhibitors                    | GERD                     | Health-related quality of life (<1 y)                              | SMD=0.14 (-0.02-0.3)+     | Very Low         |
|                                         |                                            |                          | Health-related QOL (1-5 y)                                         | SMD=0.03 (-0.19-0.24)+    | Very Low         |
|                                         |                                            |                          | GORD-specific quality of life (1-5 y)                              | SMD=0.28 (-0.27-0.84)+    | Very Low         |
| Oesophagectomy                          | Chemoradiotherapy and/or radiotherapy      | Oesophageal cancer       | Short-term mortality                                               | RR=0.39 (0.11-1.35)       | Very Low         |
|                                         |                                            |                          | Long-term mortality                                                | RR=1.03 (0.92-1.14)       | Low              |
|                                         |                                            |                          | Medium-term health-related QOL                                     | MD=-0.95 (-2.1-0.2)       | Very Low         |
| Neurosurgery                            |                                            |                          |                                                                    |                           |                  |
| Decompressive surgery                   | Prednisolone                               | Leprosy                  | Change in sensory score after one year                             | MD=0.08 (-2.45-2.61)      | Very Low         |
|                                         |                                            |                          | Proportion of ulnar nerves with sensory improvement after one year | RR=1.13 (0.71-1.77)       | Very Low         |
|                                         |                                            |                          | Change in motor score after one year                               | MD=0.82 (-1.34-2.98)      | Very Low         |
|                                         |                                            |                          | Proportion of ulnar nerves with motor improvement after one year   | RR=0.91 (0.64-1.28)       | Very Low         |
| Decompressive craniectomy               | Medical treatment (including barbiturates) | High ICP in closed TBI   | Neurological unfavourable outcome 6 mo                             | RR=1 (0.71-1.4)           | Low              |
|                                         |                                            |                          | Mortality 6 mo                                                     | RR=0.66 (0.43-1.01)       | Moderate         |
| Obstetrics and gynaecology              |                                            |                          |                                                                    |                           |                  |
| Suction aspiration                      | Vaginal or oral misoprostol                | Abortion                 | Death or serious complication                                      | RR=1 (0.04-25)            |                  |



1  
2  
3  
4  
5  
6  
7  
8  
9  
10  
11  
12  
13  
14  
15  
16  
17  
18  
19  
20  
21  
22  
23  
24  
25  
26  
27  
28  
29  
30  
31  
32  
33  
34  
35  
36  
37  
38  
39  
40  
41  
42  
43  
44  
45  
46  
47  
48  
49  
50  
51  
52  
53  
54  
55  
56  
57  
58  
59  
60

| Surgical arm                                                        | Drug arm                                                  | Disease                  | Outcome                                                           | Treatment effect (95% CI) | GRADE assessment |
|---------------------------------------------------------------------|-----------------------------------------------------------|--------------------------|-------------------------------------------------------------------|---------------------------|------------------|
| Suction aspiration                                                  | Misoprostol                                               | Abortion                 | Composite outcome of death or serious complication                | RR=1.53 (0.45-5.16)       | Very Low         |
| Suction aspiration                                                  | Misoprostol and mifepristone                              | Abortion                 | Complete miscarriage                                              | RR=1.29 (0.96-1.73)       | Very Low         |
| Suction aspiration                                                  | Vaginal suppositories or im inj. of 9-methylene-PGE2      | Abortion                 | Composite outcome of death or serious complication                | RR=0.14 (0.01-2.74)       | Very Low         |
| Suction aspiration                                                  | Vaginal suppositories or im inj. of 9-methylene-PGE2      | Abortion                 | Abortion not completed with intended method                       | OR=0.62 (0.02-16.6)       |                  |
| Suction aspiration                                                  | Vaginal suppositories or im inj. of 9-methylene-PGE2      | Abortion                 | Ongoing pregnancy                                                 | OR=1.82 (0.54-6.25)       |                  |
| Suction aspiration                                                  | Vaginal suppositories or im inj. of 9-methylene-PGE2      | Abortion                 | Pelvic infection                                                  | OR=0.46 (0.14-1.56)       |                  |
| Dilatation and curettage                                            | Misoprostol                                               | Abortion                 | Composite outcome of death or serious complication                | RR=0.79 (0.34-1.85)       | Very Low         |
| Laparoscopic ovarian drilling                                       | Metformin, Clomiphene                                     | PCOS                     | Menstrual regularity at 6 mo.                                     | OR=1.02 (0.64-1.64)       | Very Low         |
| Laparoscopic ovarian drilling                                       | Letrozele                                                 | PCOS                     | Menstrual regularity at 6 mo.                                     | OR=1.08 (0.64-1.84)       | Very Low         |
| Laparoscopic ovarian drilling                                       | Metformin, Letrozol                                       | PCOS                     | Menstrual regularity at 6 mo.                                     | OR=0.95 (0.49-1.81)       | Very Low         |
| Laparoscopic ovarian drilling                                       | Metformin                                                 | PCOS                     | Menstrual regularity at 6 mo.                                     | OR=1.51 (0.62-3.71)       | Moderate         |
| Laparoscopic ovarian drilling                                       | Gonadotropins                                             | PCOS                     | Improvement in androgenic symptoms 6 mo.                          | OR=3.02 (0.56-16.33)      | Low              |
| Laparoscopic ovarian drilling                                       | Metformin                                                 | PCOS                     | Improvement in androgenic symptoms 6 mo.                          | OR=1 (0.42-2.37)          | Low              |
| Laparoscopic ovarian drilling                                       | Letrozele                                                 | Infertility due to PCOS  | Live birth                                                        | RR=0.72 (0.5-1.05)        | Moderate         |
| Laparoscopic ovarian drilling                                       | Letrozele                                                 | Infertility due to PCOS  | Rate of ovarian hyperstimulation syndrome                         | RD=0 (-0.01-0.01)         | High             |
| Transcervical resection of endometrium using rollerball coagulation | Hormone therapy or antifibrinolytic                       | Heavy menstrual bleeding | Control of bleeding (cure or improvement to acceptable level) 5 y | RR=1.14 (0.97-1.34)       | Very Low         |
| Transcervical resection of endometrium using rollerball coagulation | Hormone therapy or antifibrinolytic                       | Heavy menstrual bleeding | Overall satisfaction with treatment 5 y                           | RR=1.13 (0.94-1.37)       | Very Low         |
| Ophthalmology                                                       |                                                           |                          |                                                                   |                           |                  |
| Amniotic membrane transplantation and medication                    | Lubrication, Antibiotics and Pressure lowering medication | Acute ocular burns       | Epithelial defect 21 d post-injury                                | RR=0.71 (0.27-1.85)       | Low              |
| Argon laser trabeculoplasty                                         | IOP reducing medication                                   | Open angle glaucoma      | Visual field progression                                          | RR=0.7 (0.42-1.16)        |                  |
| Argon laser trabeculoplasty                                         | IOP reducing medication                                   | Open angle glaucoma      | Optic neuropathy progression                                      | RR=0.71 (0.38-1.34)       |                  |
| Laser surgery                                                       | intravitreal anti-VEGF                                    | Pathological myopia      | Proportion of participants with a                                 | RR=0.32 (0.08-1.33)       | Low              |

| Surgical arm                         | Drug arm                                                                | Disease                             | Outcome                                                                                                                                               | Treatment effect (95% CI)   | GRADE assessment |
|--------------------------------------|-------------------------------------------------------------------------|-------------------------------------|-------------------------------------------------------------------------------------------------------------------------------------------------------|-----------------------------|------------------|
| Surgical correction                  | Botulinum toxin                                                         | Strabismus                          | gain of 3+ lines in BCVA at 1 y<br>Improved ocular alignment > 10 dioptres, children                                                                  | RR=1.1 (0.86-1.41)          | Low              |
| Orthopaedic surgery                  |                                                                         |                                     |                                                                                                                                                       |                             |                  |
| Arthroscopic surgery                 | Sclerosing injection                                                    | Jumper's knee                       | Withdrawal rate                                                                                                                                       | OR=1 (0.06-16.89)           | Very Low         |
| Open surgery                         | Corticosteroid injection                                                | Trigger finger                      | Resolution of triggering                                                                                                                              | RR=1.48 (0.79-2.76)         | Very low         |
| Open section of the carpal ligament  | NSAID and splinting or corticosteroid injections                        | Carpal tunnel syndrome              | Improvement in clinical symptoms at three months of follow-up                                                                                         | RR=1.09 (0.91-1.32)         |                  |
| Surgical rotator cuff repair         | Non-operative treatment including corticosteroid injection and exercise | Rotator cuff tear                   | Pain (VAS) 12 mo                                                                                                                                      | MD=-0.49 (-1.02-0.05)       | Moderate         |
| Otolaryngology                       |                                                                         |                                     |                                                                                                                                                       |                             |                  |
| Surgical orbital decompression       | IV Methylprednisolone 1x3 followed by oral prednisolone                 | Thyroid eye disease                 | Proportion of successes compared to the proportion of treatment failures as defined by the study authors based on the use of composite outcome scores | RR=0.16 (0.01-1.98)         |                  |
| Open thoracotomy                     | Thoracostomy drainage (with fibrinolytics)                              | Thoracic surgery<br>Pleural empyema | Mortality                                                                                                                                             | RR=NA (NA-NA)               | Moderate         |
| VATS                                 | Thoracostomy drainage (with fibrinolytics)                              | Pleural empyema                     | Mortality                                                                                                                                             | RR=0.8 (0.04-14.89)         | Low              |
| Urology                              |                                                                         |                                     |                                                                                                                                                       |                             |                  |
| Surgical reimplantation of ureters   | Antibiotics                                                             | Primary vesicoureteric reflux       | Rate of patients with symptomatic UTI                                                                                                                 | RR=0.95 (0.67-1.35)         |                  |
| Vascular surgery                     |                                                                         |                                     |                                                                                                                                                       |                             |                  |
| Surgery including primary amputation | Thrombolysis (w/ rt-Pa or urokinase)                                    | Acute limb ischaemia                | Limb salvage (30 d)                                                                                                                                   | OR=0.89 (0.27-2.91)         | Low              |
| Saphenofemoral disconnection         | Therapeutic LMWH                                                        | Superficial thrombophlebitis        | Symptomatic VTE                                                                                                                                       | RR=5 (0.25-100)             |                  |
| Aspirin and carotid surgery          | Aspirin                                                                 | Carotid stenosis                    | Major bleeding<br>Ipsilateral ischaemic stroke, and any operative stroke or death near occlusion                                                      | RR=NA<br>RR=0.89 (0.6-1.32) | Moderate         |

### Abbreviations

RR: risk ratio

1  
2  
3 OR: odds ratio  
4 HR: hazard ratio  
5 MD: mean difference  
6 SMD: standardized mean difference  
7

8  
9 BCC: basal cell carcinoma of the skin  
10 GERD: Gastro-oesophageal reflux disease  
11 GTN: glyceryl tri-nitrate  
12 IOP: intra-ocular pressure  
13 PCOS: polycystic ovarian syndrome  
14 QOL: Quality of life  
15  
16  
17  
18  
19  
20  
21  
22  
23  
24  
25  
26  
27  
28  
29  
30  
31  
32  
33  
34  
35  
36  
37  
38  
39  
40  
41  
42  
43  
44  
45  
46  
47  
48  
49  
50  
51  
52  
53  
54  
55  
56  
57  
58  
59  
60

For peer review only

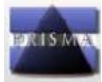

## PRISMA 2020 Checklist

| Section and Topic             | Item # | Checklist item                                                                                                                                                                                                                                                                                       | Location where item is reported |
|-------------------------------|--------|------------------------------------------------------------------------------------------------------------------------------------------------------------------------------------------------------------------------------------------------------------------------------------------------------|---------------------------------|
| <b>TITLE</b>                  |        |                                                                                                                                                                                                                                                                                                      |                                 |
| Title                         | 1      | Identify the report as a systematic review.                                                                                                                                                                                                                                                          | 1                               |
| <b>ABSTRACT</b>               |        |                                                                                                                                                                                                                                                                                                      |                                 |
| Abstract                      | 2      | See the PRISMA 2020 for Abstracts checklist.                                                                                                                                                                                                                                                         | 4                               |
| <b>INTRODUCTION</b>           |        |                                                                                                                                                                                                                                                                                                      |                                 |
| Rationale                     | 3      | Describe the rationale for the review in the context of existing knowledge.                                                                                                                                                                                                                          | 6                               |
| Objectives                    | 4      | Provide an explicit statement of the objective(s) or question(s) the review addresses.                                                                                                                                                                                                               | 4                               |
| <b>METHODS</b>                |        |                                                                                                                                                                                                                                                                                                      |                                 |
| Eligibility criteria          | 5      | Specify the inclusion and exclusion criteria for the review and how studies were grouped for the syntheses.                                                                                                                                                                                          | 7                               |
| Information sources           | 6      | Specify all databases, registers, websites, organisations, reference lists and other sources searched or consulted to identify studies. Specify the date when each source was last searched or consulted.                                                                                            | 7                               |
| Search strategy               | 7      | Present the full search strategies for all databases, registers and websites, including any filters and limits used.                                                                                                                                                                                 | 7                               |
| Selection process             | 8      | Specify the methods used to decide whether a study met the inclusion criteria of the review, including how many reviewers screened each record and each report retrieved, whether they worked independently, and if applicable, details of automation tools used in the process.                     | 7                               |
| Data collection process       | 9      | Specify the methods used to collect data from reports, including how many reviewers collected data from each report, whether they worked independently, any processes for obtaining or confirming data from study investigators, and if applicable, details of automation tools used in the process. | 8                               |
| Data items                    | 10a    | List and define all outcomes for which data were sought. Specify whether all results that were compatible with each outcome domain in each study were sought (e.g. for all measures, time points, analyses), and if not, the methods used to decide which results to collect.                        | 8                               |
|                               | 10b    | List and define all other variables for which data were sought (e.g. participant and intervention characteristics, funding sources). Describe any assumptions made about any missing or unclear information.                                                                                         | 8                               |
| Study risk of bias assessment | 11     | Specify the methods used to assess risk of bias in the included studies, including details of the tool(s) used, how many reviewers assessed each study and whether they worked independently, and if applicable, details of automation tools used in the process.                                    | 8                               |
| Effect measures               | 12     | Specify for each outcome the effect measure(s) (e.g. risk ratio, mean difference) used in the synthesis or presentation of results.                                                                                                                                                                  | 8                               |
| Synthesis methods             | 13a    | Describe the processes used to decide which studies were eligible for each synthesis (e.g. tabulating the study intervention characteristics and comparing against the planned groups for each synthesis (item #5)).                                                                                 | NA                              |
|                               | 13b    | Describe any methods required to prepare the data for presentation or synthesis, such as handling of missing summary statistics, or data conversions.                                                                                                                                                | 7-8                             |
|                               | 13c    | Describe any methods used to tabulate or visually display results of individual studies and syntheses.                                                                                                                                                                                               | 7                               |
|                               | 13d    | Describe any methods used to synthesize results and provide a rationale for the choice(s). If meta-analysis was performed, describe the model(s), method(s) to identify the presence and extent of statistical heterogeneity, and software package(s) used.                                          | 8                               |
|                               | 13e    | Describe any methods used to explore possible causes of heterogeneity among study results (e.g. subgroup analysis, meta-regression).                                                                                                                                                                 | Not relevant                    |
|                               | 13f    | Describe any sensitivity analyses conducted to assess robustness of the synthesized results.                                                                                                                                                                                                         | Not relevant                    |
| Reporting bias assessment     | 14     | Describe any methods used to assess risk of bias due to missing results in a synthesis (arising from reporting biases).                                                                                                                                                                              | 10                              |
| Certainty                     | 15     | Describe any methods used to assess certainty (or confidence) in the body of evidence for an outcome.                                                                                                                                                                                                | 7-8                             |



## PRISMA 2020 Checklist

| Section and Topic                              | Item # | Checklist item                                                                                                                                                                                                                                                                       | Location where item is reported |
|------------------------------------------------|--------|--------------------------------------------------------------------------------------------------------------------------------------------------------------------------------------------------------------------------------------------------------------------------------------|---------------------------------|
| assessment                                     |        |                                                                                                                                                                                                                                                                                      |                                 |
| <b>RESULTS</b>                                 |        |                                                                                                                                                                                                                                                                                      |                                 |
| Study selection                                | 16a    | Describe the results of the search and selection process, from the number of records identified in the search to the number of studies included in the review, ideally using a flow diagram.                                                                                         | 11                              |
|                                                | 16b    | Cite studies that might appear to meet the inclusion criteria, but which were excluded, and explain why they were excluded.                                                                                                                                                          | 11                              |
| Study characteristics                          | 17     | Cite each included study and present its characteristics.                                                                                                                                                                                                                            | Supplement 1                    |
| Risk of bias in studies                        | 18     | Present assessments of risk of bias for each included study.                                                                                                                                                                                                                         | 11 (GRADE)                      |
| Results of individual studies                  | 19     | For all outcomes, present, for each study: (a) summary statistics for each group (where appropriate) and (b) an effect estimate and its precision (e.g. confidence/credible interval), ideally using structured tables or plots.                                                     | 12-13                           |
| Results of syntheses                           | 20a    | For each synthesis, briefly summarise the characteristics and risk of bias among contributing studies.                                                                                                                                                                               | 11                              |
|                                                | 20b    | Present results of all statistical syntheses conducted. If meta-analysis was done, present for each the summary estimate and its precision (e.g. confidence/credible interval) and measures of statistical heterogeneity. If comparing groups, describe the direction of the effect. | p. 13 Table 2 & 3               |
|                                                | 20c    | Present results of all investigations of possible causes of heterogeneity among study results.                                                                                                                                                                                       | Not relevant                    |
|                                                | 20d    | Present results of all sensitivity analyses conducted to assess the robustness of the synthesized results.                                                                                                                                                                           | Not relevant                    |
| Reporting biases                               | 21     | Present assessments of risk of bias due to missing results (arising from reporting biases) for each synthesis assessed.                                                                                                                                                              | 13                              |
| Certainty of evidence                          | 22     | Present assessments of certainty (or confidence) in the body of evidence for each outcome assessed.                                                                                                                                                                                  | 13                              |
| <b>DISCUSSION</b>                              |        |                                                                                                                                                                                                                                                                                      |                                 |
| Discussion                                     | 23a    | Provide a general interpretation of the results in the context of other evidence.                                                                                                                                                                                                    | 15                              |
|                                                | 23b    | Discuss any limitations of the evidence included in the review.                                                                                                                                                                                                                      | 16                              |
|                                                | 23c    | Discuss any limitations of the review processes used.                                                                                                                                                                                                                                | 16                              |
|                                                | 23d    | Discuss implications of the results for practice, policy, and future research.                                                                                                                                                                                                       | 17                              |
| <b>OTHER INFORMATION</b>                       |        |                                                                                                                                                                                                                                                                                      |                                 |
| Registration and protocol                      | 24a    | Provide registration information for the review, including register name and registration number, or state that the review was not registered.                                                                                                                                       | 3                               |
|                                                | 24b    | Indicate where the review protocol can be accessed, or state that a protocol was not prepared.                                                                                                                                                                                       | 3                               |
|                                                | 24c    | Describe and explain any amendments to information provided at registration or in the protocol.                                                                                                                                                                                      | 9                               |
| Support                                        | 25     | Describe sources of financial or non-financial support for the review, and the role of the funders or sponsors in the review.                                                                                                                                                        | 2                               |
| Competing interests                            | 26     | Declare any competing interests of review authors.                                                                                                                                                                                                                                   | 2                               |
| Availability of data, code and other materials | 27     | Report which of the following are publicly available and where they can be found: template data collection forms; data extracted from included studies; data used for all analyses; analytic code; any other materials used in the review.                                           | 2                               |

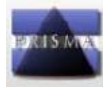

## PRISMA 2020 Checklist

- 1
- 2
- 3
- 4
- 5
- 6
- 7
- 8
- 9
- 10
- 11
- 12
- 13
- 14
- 15
- 16
- 17
- 18
- 19
- 20
- 21
- 22
- 23
- 24
- 25
- 26
- 27
- 28
- 29
- 30
- 31
- 32
- 33
- 34
- 35
- 36
- 37
- 38
- 39
- 40
- 41
- 42
- 43
- 44
- 45
- 46
- 47

10.1136/bmj.n71

For more information, visit: <http://www.prisma-statement.org/>

For peer review only



## PRISMA 2020 for Abstracts Checklist

| Section and Topic       | Item # | Checklist item                                                                                                                                                                                                                                                                                        | Reported (Yes/No) |
|-------------------------|--------|-------------------------------------------------------------------------------------------------------------------------------------------------------------------------------------------------------------------------------------------------------------------------------------------------------|-------------------|
| <b>TITLE</b>            |        |                                                                                                                                                                                                                                                                                                       |                   |
| Title                   | 1      | Identify the report as a systematic review.                                                                                                                                                                                                                                                           | Yes               |
| <b>BACKGROUND</b>       |        |                                                                                                                                                                                                                                                                                                       |                   |
| Objectives              | 2      | Provide an explicit statement of the main objective(s) or question(s) the review addresses.                                                                                                                                                                                                           | Yes               |
| <b>METHODS</b>          |        |                                                                                                                                                                                                                                                                                                       |                   |
| Eligibility criteria    | 3      | Specify the inclusion and exclusion criteria for the review.                                                                                                                                                                                                                                          | Yes               |
| Information sources     | 4      | Specify the information sources (e.g. databases, registers) used to identify studies and the date when each was last searched.                                                                                                                                                                        | Yes               |
| Risk of bias            | 5      | Specify the methods used to assess risk of bias in the included studies.                                                                                                                                                                                                                              | Yes               |
| Synthesis of results    | 6      | Specify the methods used to present and synthesise results.                                                                                                                                                                                                                                           | Yes               |
| <b>RESULTS</b>          |        |                                                                                                                                                                                                                                                                                                       |                   |
| Included studies        | 7      | Give the total number of included studies and participants and summarise relevant characteristics of studies.                                                                                                                                                                                         | Yes               |
| Synthesis of results    | 8      | Present results for main outcomes, preferably indicating the number of included studies and participants for each. If meta-analysis was done, report the summary estimate and confidence/credible interval. If comparing groups, indicate the direction of the effect (i.e. which group is favoured). | Yes               |
| <b>DISCUSSION</b>       |        |                                                                                                                                                                                                                                                                                                       |                   |
| Limitations of evidence | 9      | Provide a brief summary of the limitations of the evidence included in the review (e.g. study risk of bias, inconsistency and imprecision).                                                                                                                                                           | Yes               |
| Interpretation          | 10     | Provide a general interpretation of the results and important implications.                                                                                                                                                                                                                           | Yes               |
| <b>OTHER</b>            |        |                                                                                                                                                                                                                                                                                                       |                   |

1  
2  
3  
4  
5  
6  
7  
8  
9  
10  
11  
12  
13  
14  
15  
16  
17  
18  
19  
20  
21  
22  
23  
24  
25  
26  
27  
28  
29  
30  
31  
32  
33  
34  
35  
36  
37  
38  
39  
40  
41  
42  
43  
44  
45  
46  
47

|              |    |                                                       |     |
|--------------|----|-------------------------------------------------------|-----|
| Funding      | 11 | Specify the primary source of funding for the review. | Yes |
| Registration | 12 | Provide the register name and registration number.    | Yes |

For peer review only
