# Supplementary material for: Availability of evidence and comparative effectiveness for surgical versus drug interventions: an overview of systematic reviews and meta-analyses
Source: PubMed Central journal article supplement (PMC10810041; doi:10.1136/bmjopen-2023-076675), 2024-01-09
Supplement: bmjopen-2023-076675supp001.pdf [file bmjopen-2023-076675supp001.pdf]

## Availability of evidence and comparative effectiveness for surgical versus drug interventions: an overview of systematic reviews

Emmanuel A. Zavalis<sup>1,2\*</sup>, Anaïs Rameau<sup>3\*</sup>, Anirudh Saraswathula<sup>4\*</sup>, Joachim Vist<sup>1</sup>, Ewoud Schuit<sup>5,6</sup>,

John P. A. Ioannidis<sup>2,7</sup>

\*co-first authors

1 Department of Learning Informatics Management and Ethics, Karolinska Institutet, Stockholm, Sweden

2 Meta-Research Innovation Center at Stanford (METRICS), Stanford University, Stanford, CA, USA

3 Sean Parker Institute for the Voice, Department of Otolaryngology–Head and Neck Surgery, Weill Cornell Medical College, New York, NY, USA

4 Department of Otolaryngology–Head and Neck Surgery, Johns Hopkins University School of Medicine, Baltimore, MD, USA

5 Julius Center, University Medical Center Utrecht, Utrecht University, Utrecht, the Netherlands

6 Cochrane Netherland, University Medical Center Utrecht, Utrecht University, Utrecht, the Netherlands

7 Stanford Prevention Research Center, Department of Medicine, and Department of Epidemiology and Population Health, Stanford University School of Medicine, Stanford, CA, USA

### Supplementary Materials - Index

#### Supplementary Data

Supplement 1 – List of included studies *pag. 2*

#### Supplementary Figures and Tables

Supplementary Table 1 *pag. 7*

Supplementary Table 2 *pag. 8*

## Supplementary Data

## Supplement 1 – List of included studies

| CDSR_ID       | Title                                                                                                                                                 | Specialty                 | Comparison available |
|---------------|-------------------------------------------------------------------------------------------------------------------------------------------------------|---------------------------|----------------------|
| CD005624.PUB4 | Interventions for great saphenous vein incompetence                                                                                                   | vascular surgery          | No                   |
| CD006931.PUB2 | Submacular surgery for choroidal neovascularisation secondary to age-related macular degeneration                                                     | ophthalmology             | No                   |
| CD002764.PUB2 | Surgery for the resolution of symptoms in malignant bowel obstruction in advanced gynaecological and gastrointestinal cancer                          | general surgery           | No                   |
| CD007119.PUB2 | Interventions for restoring patency of occluded central venous catheter lumens                                                                        | vascular surgery          | No                   |
| CD008509.PUB3 | Alpha-blockers as medical expulsive therapy for ureteral stones                                                                                       | urology                   | No                   |
| CD013085.PUB2 | Balneotherapy for chronic venous insufficiency                                                                                                        | vascular surgery          | No                   |
| CD009959.PUB2 | Interventions for the treatment of Frey's syndrome                                                                                                    | otolaryngology            | No                   |
| CD004008.PUB3 | Interventions for trachoma trichiasis                                                                                                                 | ophthalmology             | No                   |
| CD006134.PUB5 | Oral contraceptives for functional ovarian cysts                                                                                                      | obstetrics and gynecology | No                   |
| CD011650.PUB2 | Management of people with early- or very early-stage hepatocellular carcinoma                                                                         | general surgery           | No                   |
| CD001081.PUB4 | Carotid endarterectomy for symptomatic carotid stenosis                                                                                               | vascular surgery          | Yes                  |
| CD010244.PUB2 | Resection versus other treatments for locally advanced pancreatic cancer                                                                              | general surgery           | Yes                  |
| CD012432.PUB2 | Interventions for managing medication-related osteonecrosis of the jaw                                                                                | otolaryngology            | No                   |
| CD010260.PUB2 | Hysterectomy with radiotherapy or chemotherapy or both for women with locally advanced cervical cancer                                                | obstetrics and gynecology | No                   |
| CD012602.PUB2 | Methods for managing miscarriage: a network meta-analysis                                                                                             | obstetrics and gynecology | Yes                  |
| CD006983.PUB3 | Decompressive surgery for treating nerve damage in leprosy                                                                                            | neurosurgery              | Yes                  |
| CD009590.PUB2 | Endometriosis: an overview of Cochrane Reviews                                                                                                        | obstetrics and gynecology | No                   |
| CD005320.PUB2 | Operative and non-operative treatment options for dislocation of the hip following total hip arthroplasty                                             | orthopaedic surgery       | No                   |
| CD010349.PUB2 | Iodine-131-meta-iodobenzylguanidine therapy for patients with newly diagnosed high-risk neuroblastoma                                                 | neurosurgery              | No                   |
| CD010712      | Nonoperative treatment for lumbar spinal stenosis with neurogenic claudication                                                                        | orthopaedic surgery       | No                   |
| CD011478.PUB2 | Type II or type III radical hysterectomy compared to chemoradiotherapy as a primary intervention for stage IB2 cervical cancer                        | obstetrics and gynecology | No                   |
| CD002116.PUB2 | Drug treatment for faecal incontinence in adults                                                                                                      | general surgery           | No                   |
| CD005029.PUB2 | Treatment for ataxia in multiple sclerosis                                                                                                            | neurosurgery              | No                   |
| CD008107.PUB2 | Perioperative chemo(radio)therapy versus primary surgery for resectable adenocarcinoma of the stomach, gastroesophageal junction, and lower esophagus | general surgery           | No                   |
| CD008602.PUB4 | Interventions for congenital talipes equinovarus (clubfoot)                                                                                           | orthopaedic surgery       | No                   |
| CD004461.PUB3 | Interventions for recurrent idiopathic epistaxis (nosebleeds) in children                                                                             | otolaryngology            | No                   |
| CD006476.PUB3 | Management for intussusception in children                                                                                                            | general surgery           | No                   |
| CD009166.PUB2 | Cervical stitch (cerclage) for preventing preterm birth in multiple pregnancy                                                                         | obstetrics and gynecology | No                   |
| CD002221.PUB2 | Interventions for involitional lower lid entropion                                                                                                    | ophthalmology             | No                   |
| CD009379.PUB2 | Amniotic membrane transplantation for acute ocular burns                                                                                              | ophthalmology             | Yes                  |
| CD003296.PUB3 | Retinoids for preventing the progression of cervical intra-epithelial neoplasia                                                                       | obstetrics and gynecology | No                   |
| CD004917.PUB3 | Interventions for infantile esotropia                                                                                                                 | ophthalmology             | No                   |
| CD003431.PUB3 | Non surgical therapy for anal fissure                                                                                                                 | general surgery           | Yes                  |
| CD007340.PUB2 | Bariatric surgery for non-alcoholic steatohepatitis in obese patients                                                                                 | general surgery           | No                   |

| CDSR_ID       | Title                                                                                                                                                                   | Specialty                 | Comparison available |
|---------------|-------------------------------------------------------------------------------------------------------------------------------------------------------------------------|---------------------------|----------------------|
| CD001122.PUB5 | Laparoscopic ovarian drilling for ovulation induction in women with anovulatory polycystic ovary syndrome                                                               | obstetrics and gynecology | Yes                  |
| CD007156.PUB2 | Interventions for the management of oral submucous fibrosis                                                                                                             | otolaryngology            | No                   |
| CD012802.PUB2 | Ab interno supraciliary microstent surgery for open-angle glaucoma                                                                                                      | ophthalmology             | No                   |
| CD004399.PUB3 | Medical versus surgical interventions for open angle glaucoma                                                                                                           | ophthalmology             | No                   |
| CD009266.PUB2 | Non-steroidal antiandrogen monotherapy compared with luteinising hormone-releasing hormone agonists or surgical castration monotherapy for advanced prostate cancer     | urology                   | No                   |
| CD010273.PUB2 | Interventions for treating postpartum constipation                                                                                                                      | general surgery           | No                   |
| CD009366.PUB2 | Lumbar sympathectomy versus prostanoids for critical limb ischaemia due to non-reconstructable peripheral arterial disease                                              | orthopaedic surgery       | Yes                  |
| CD007060.PUB2 | Liver resection versus other treatments for neuroendocrine tumours in patients with resectable liver metastases                                                         | general surgery           | No                   |
| CD008088.PUB3 | Anti-TNF- $\alpha$ treatment for pelvic pain associated with endometriosis                                                                                              | obstetrics and gynecology | No                   |
| CD004982.PUB6 | Treatment for superficial thrombophlebitis of the leg                                                                                                                   | vascular surgery          | Yes                  |
| CD007939.PUB2 | Single herbal medicine for diabetic retinopathy                                                                                                                         | ophthalmology             | No                   |
| CD002000.PUB3 | Bypass surgery for chronic lower limb ischaemia                                                                                                                         | vascular surgery          | No                   |
| CD012017.PUB2 | Grommets (ventilation tubes) for recurrent acute otitis media in children                                                                                               | otolaryngology            | Yes                  |
| CD009968.PUB2 | Botulinum toxin for upper oesophageal sphincter dysfunction in neurological swallowing disorders                                                                        | general surgery           | No                   |
| CD004272.PUB3 | Surgery versus primary endocrine therapy for operable primary breast cancer in elderly women (70 years plus)                                                            | general surgery           | Yes                  |
| CD007118.PUB2 | Palliative cytoreductive surgery versus other palliative treatments in patients with unresectable liver metastases from gastro-entero-pancreatic neuroendocrine tumours | general surgery           | No                   |
| CD006714.PUB2 | Surgical versus medical methods for second trimester induced abortion                                                                                                   | obstetrics and gynecology | Yes                  |
| CD011174.PUB2 | Interventions for non-tubal ectopic pregnancy                                                                                                                           | obstetrics and gynecology | No                   |
| CD010541.PUB3 | Surgery for epilepsy                                                                                                                                                    | neurosurgery              | Yes                  |
| CD013034.PUB2 | Surgery for patellar tendinopathy (jumper's knee)                                                                                                                       | orthopaedic surgery       | Yes                  |
| CD007481.PUB3 | Chemical pleurodesis versus surgical intervention for persistent and recurrent pneumothoraces in cystic fibrosis                                                        | thoracic surgery          | No                   |
| CD003712.PUB3 | Transmyocardial laser revascularization versus medical therapy for refractory angina                                                                                    | cardiac surgery           | Yes                  |
| CD008997.PUB2 | Non-resection versus resection for an asymptomatic primary tumour in patients with unresectable Stage IV colorectal cancer                                              | general surgery           | No                   |
| CD005081.PUB3 | Medical and surgical treatment for ocular myasthenia                                                                                                                    | ophthalmology             | No                   |
| CD013099.PUB2 | Interventions for bacterial folliculitis and boils (furuncles and carbuncles)                                                                                           | general surgery           | No                   |
| CD011837.PUB2 | Medical and surgical interventions for the treatment of usual-type vulval intraepithelial neoplasia                                                                     | obstetrics and gynecology | No                   |
| CD003951.PUB3 | Surgical versus medical treatment with cyclooxygenase inhibitors for symptomatic patent ductus arteriosus in preterm infants                                            | cardiac surgery           | Yes                  |
| CD007261.PUB2 | Interventions for managing temporomandibular joint osteoarthritis                                                                                                       | orthopaedic surgery       | No                   |
| CD003193.PUB4 | Anticholinergic drugs versus non-drug active therapies for non-neurogenic overactive bladder syndrome in adults                                                         | urology                   | No                   |
| CD009493.PUB2 | N-acetylcarnosine (NAC) drops for age-related cataract                                                                                                                  | ophthalmology             | No                   |
| CD005198.PUB3 | Therapeutic interventions for Burkitt lymphoma in children                                                                                                              | otolaryngology            | No                   |
| CD004981.PUB4 | Treatment for femoral pseudoaneurysms                                                                                                                                   | vascular surgery          | No                   |
| CD003525.PUB2 | Surgery for lateral elbow pain                                                                                                                                          | orthopaedic surgery       | No                   |
| CD013006.PUB2 | Interventions for the management of obesity in people with bipolar disorder                                                                                             | general surgery           | No                   |
| CD013404.PUB2 | Surgical interventions for treating intracapsular hip fractures in older adults: a network meta-analysis                                                                | orthopaedic surgery       | No                   |
| CD011725.PUB2 | Indomethacin for intracranial hypertension secondary to severe traumatic brain injury in adults                                                                         | neurosurgery              | No                   |

| CDSR_ID       | Title                                                                                                                        | Specialty                 | Comparison available |
|---------------|------------------------------------------------------------------------------------------------------------------------------|---------------------------|----------------------|
| CD009526.PUB2 | Ovarian surgery for symptom relief in women with polycystic ovary syndrome                                                   | obstetrics and gynecology | Yes                  |
| CD003855.PUB3 | Surgery versus medical therapy for heavy menstrual bleeding                                                                  | obstetrics and gynecology | Yes                  |
| CD009505.PUB2 | Aromatase inhibitors for uterine fibroids                                                                                    | obstetrics and gynecology | No                   |
| CD003037.PUB2 | Medical versus surgical methods for first trimester termination of pregnancy                                                 | obstetrics and gynecology | Yes                  |
| CD011169.PUB2 | Selective oestrogen receptor modulators (SERMs) for endometriosis                                                            | obstetrics and gynecology | No                   |
| CD007924.PUB3 | Medical interventions for high-grade vulval intraepithelial neoplasia                                                        | obstetrics and gynecology | No                   |
| CD008111.PUB2 | Thymectomy for non-thymomatous myasthenia gravis                                                                             | thoracic surgery          | No                   |
| CD007223.PUB4 | Medical treatments for incomplete miscarriage                                                                                | obstetrics and gynecology | Yes                  |
| CD010308.PUB2 | Interventions for melanoma in situ, including lentigo maligna                                                                | general surgery           | No                   |
| CD007468.PUB4 | Surgical interventions for the early management of Bell's palsy                                                              | neurosurgery              | No                   |
| CD007792.PUB2 | Palliative surgery versus medical management for bowel obstruction in ovarian cancer                                         | general surgery           | No                   |
| CD008455.PUB2 | Interventions for treating bisphosphonate-related osteonecrosis of the jaw (BRONJ)                                           | orthopaedic surgery       | No                   |
| CD002115.PUB5 | Management of faecal incontinence and constipation in adults with central neurological diseases                              | general surgery           | No                   |
| CD006991.PUB2 | Surgical versus medical interventions for chronic rhinosinusitis with nasal polyps                                           | otolaryngology            | No                   |
| CD001496.PUB2 | Pharmacological and surgical interventions for the treatment of gastro-oesophageal reflux in adults and children with asthma | general surgery           | No                   |
| CD008571.PUB2 | Interventions for women with endometrioma prior to assisted reproductive technology                                          | obstetrics and gynecology | No                   |
| CD006544.PUB3 | Prostanoids for critical limb ischaemia                                                                                      | vascular surgery          | No                   |
| CD003435.PUB2 | Surgical decompression for cerebral oedema in acute ischaemic stroke                                                         | neurosurgery              | Yes                  |
| CD013325.PUB2 | Interventions for treating people with symptoms of bladder pain syndrome: a network meta-analysis                            | urology                   | No                   |
| CD001066.PUB3 | Interventions for varicose veins and leg oedema in pregnancy                                                                 | vascular surgery          | No                   |
| CD006388.PUB2 | Octreotide for the treatment of chylothorax in neonates                                                                      | thoracic surgery          | No                   |
| CD003658.PUB3 | Needling for encapsulated trabeculectomy filtering blebs                                                                     | ophthalmology             | No                   |
| CD006152.PUB2 | Decompressive surgery of lower limbs for symmetrical diabetic peripheral neuropathy                                          | orthopaedic surgery       | No                   |
| CD001896.PUB2 | Surgical interruption of pelvic nerve pathways for primary and secondary dysmenorrhoea                                       | obstetrics and gynecology | No                   |
| CD004699.PUB2 | Surgery for local and locally advanced non-small cell lung cancer                                                            | thoracic surgery          | No                   |
| CD002867      | Treatments for secondary postpartum haemorrhage                                                                              | obstetrics and gynecology | No                   |
| CD006373.PUB2 | Interventions for treating functional dysphonia in adults                                                                    | otolaryngology            | No                   |
| CD001541.PUB3 | Interventions for ingrowing toenails                                                                                         | general surgery           | No                   |
| CD013469.PUB2 | Surgical and medical interventions for abdominal aortic graft infections                                                     | vascular surgery          | No                   |
| CD001219      | Corticosteroids for the resolution of malignant bowel obstruction in advanced gynaecological and gastrointestinal cancer     | general surgery           | No                   |
| CD005304.PUB3 | Interventions for primary (intrinsic) tracheomalacia in children                                                             | thoracic surgery          | No                   |
| CD011498.PUB2 | Non-surgical versus surgical treatment for oesophageal cancer                                                                | general surgery           | Yes                  |
| CD002784.PUB3 | Surgery versus thrombolysis for initial management of acute limb ischaemia                                                   | vascular surgery          | Yes                  |
| CD006499.PUB4 | Botulinum toxin for the treatment of strabismus                                                                              | ophthalmology             | Yes                  |
| CD005024.PUB3 | Surgery for traumatic optic neuropathy                                                                                       | general surgery           | No                   |
| CD003243.PUB3 | Laparoscopic fundoplication surgery versus medical management for gastro-oesophageal reflux disease (GORD) in adults         | general surgery           | Yes                  |
| CD003118.PUB2 | Interventions for the treatment of Morton's neuroma                                                                          | orthopaedic surgery       | No                   |
| CD001001.PUB3 | Lung volume reduction surgery for diffuse emphysema                                                                          | thoracic surgery          | No                   |
| CD010784.PUB3 | Medical and surgical interventions for the treatment of urinary stones in children                                           | urology                   | No                   |

| CDSR_ID       | Title                                                                                                                                        | Specialty                 | Comparison available |
|---------------|----------------------------------------------------------------------------------------------------------------------------------------------|---------------------------|----------------------|
| CD000324.PUB2 | Interventions for tubal ectopic pregnancy                                                                                                    | obstetrics and gynecology | No                   |
| CD000526.PUB2 | Interventions for treating tuberculous pericarditis                                                                                          | cardiac surgery           | No                   |
| CD004156.PUB4 | Treatment for spasticity in amyotrophic lateral sclerosis/motor neuron disease                                                               | neurosurgery              | No                   |
| CD004159.PUB3 | Treatment for meralgia paraesthetica                                                                                                         | neurosurgery              | No                   |
| CD006797.PUB2 | Surgical resection versus non-surgical treatment for hepatic node positive patients with colorectal liver metastases                         | general surgery           | No                   |
| CD007510.PUB3 | Botulinum toxin for masseter hypertrophy                                                                                                     | otolaryngology            | No                   |
| CD011523.PUB2 | Medical versus surgical treatment for refractory or recurrent peptic ulcer                                                                   | general surgery           | No                   |
| CD001802.PUB3 | Tonsillectomy or adenotonsillectomy versus non-surgical treatment for chronic/recurrent acute tonsillitis                                    | otolaryngology            | Yes                  |
| CD007383.PUB3 | Surgical versus non-surgical management of abdominal injury                                                                                  | general surgery           | No                   |
| CD006981.PUB2 | Treatment for sialorrhoea (excessive saliva) in people with motor neuron disease/amyotrophic lateral sclerosis                               | otolaryngology            | No                   |
| CD001829.PUB4 | Interventions for treating oral leukoplakia to prevent oral cancer                                                                           | otolaryngology            | No                   |
| CD001934.PUB2 | Surgical versus non-surgical interventions for vocal cord nodules                                                                            | otolaryngology            | No                   |
| CD003412.PUB3 | Interventions for basal cell carcinoma of the skin                                                                                           | dermatology               | Yes                  |
| CD003425.PUB4 | Splenectomy versus conservative management for acute sequestration crises in people with sickle cell disease                                 | general surgery           | No                   |
| CD003983.PUB3 | Decompressive craniectomy for the treatment of high intracranial pressure in closed traumatic brain injury                                   | neurosurgery              | Yes                  |
| CD004098.PUB2 | Levothyroxine or minimally invasive therapies for benign thyroid nodules                                                                     | general surgery           | No                   |
| CD004437.PUB6 | Thrombolytic therapy for pulmonary embolism                                                                                                  | cardiac surgery           | No                   |
| CD004927.PUB4 | Surgical management of functional bladder outlet obstruction in adults with neurogenic bladder dysfunction                                   | urology                   | No                   |
| CD005619.PUB3 | Subacromial decompression surgery for rotator cuff disease                                                                                   | orthopaedic surgery       | No                   |
| CD006032.PUB4 | Steroids for traumatic optic neuropathy                                                                                                      | ophthalmology             | No                   |
| CD006746.PUB4 | Laser peripheral iridoplasty for chronic angle closure                                                                                       | ophthalmology             | No                   |
| CD007281.PUB2 | Interventions for cutaneous Bowen's disease                                                                                                  | dermatology               | No                   |
| CD007404.PUB2 | Interventions for central giant cell granuloma (CGCG) of the jaws                                                                            | otolaryngology            | No                   |
| CD007535.PUB4 | Chinese herbal medicine for subfertile women with polycystic ovarian syndrome                                                                | obstetrics and gynecology | No                   |
| CD008280.PUB2 | Interventions for atrophic rhinitis                                                                                                          | otolaryngology            | No                   |
| CD009244.PUB2 | Interventions for anal canal intraepithelial neoplasia                                                                                       | general surgery           | No                   |
| CD010287.PUB3 | Aromatase inhibitors (letrozole) for subfertile women with polycystic ovary syndrome                                                         | obstetrics and gynecology | Yes                  |
| CD010651.PUB2 | Surgical versus non-surgical management for pleural empyema                                                                                  | thoracic surgery          | Yes                  |
| CD011160.PUB2 | Anti-vascular endothelial growth factor for choroidal neovascularisation in people with pathological myopia                                  | ophthalmology             | Yes                  |
| CD012742.PUB2 | Subconjunctival draining minimally-invasive glaucoma devices for medically uncontrolled glaucoma                                             | ophthalmology             | No                   |
| CD012743.PUB2 | Ab interno trabecular bypass surgery with iStent for open-angle glaucoma                                                                     | ophthalmology             | Yes                  |
| CD012834.PUB2 | Medical and surgical abortion for women living with HIV                                                                                      | obstetrics and gynecology | No                   |
| CD012879.PUB2 | Shoulder replacement surgery for osteoarthritis and rotator cuff tear arthropathy                                                            | orthopaedic surgery       | No                   |
| CD006131.PUB3 | Interventions for Mooren's ulcer                                                                                                             | dermatology               | No                   |
| CD007677.PUB4 | Pentoxifylline for the treatment of endometriosis-associated pain and infertility                                                            | obstetrics and gynecology | No                   |
| CD012740.PUB2 | Ab interno trabecular bypass surgery with Schlemm's canal microstent (Hydrus) for open angle glaucoma                                        | ophthalmology             | No                   |
| CD006151.PUB3 | Fundoplication versus postoperative medication for gastro-oesophageal reflux in children with neurological impairment undergoing gastrostomy | general surgery           | No                   |
| CD010081.PUB2 | Interventions for hidradenitis suppurativa                                                                                                   | dermatology               | No                   |
| CD007630.PUB2 | Surgical orbital decompression for thyroid eye disease                                                                                       | otolaryngology            | Yes                  |
| CD011165.PUB2 | Tonsillectomy or adenotonsillectomy versus non-surgical management for obstructive sleep-disordered breathing in children                    | otolaryngology            | No                   |

| CDSR_ID       | Title                                                                                                                                      | Specialty                 | Comparison available |
|---------------|--------------------------------------------------------------------------------------------------------------------------------------------|---------------------------|----------------------|
| CD005656.PUB3 | Intravitreal steroids for macular edema in diabetes                                                                                        | ophthalmology             | No                   |
| CD009860.PUB2 | Surgery for trigger finger                                                                                                                 | orthopaedic surgery       | Yes                  |
| CD013502      | Surgery for rotator cuff tears                                                                                                             | orthopaedic surgery       | Yes                  |
| CD002180      | Surgery versus non-surgical treatment for bronchiectasis                                                                                   | thoracic surgery          | No                   |
| CD010868.PUB2 | Interventions for dissociated vertical deviation                                                                                           | ophthalmology             | No                   |
| CD001408.PUB2 | Botulinum toxin type A in the treatment of lower limb spasticity in children with cerebral palsy                                           | orthopaedic surgery       | No                   |
| CD003919.PUB2 | Laser trabeculoplasty for open angle glaucoma                                                                                              | ophthalmology             | Yes                  |
| CD010312.PUB2 | Prostaglandins for management of retained placenta                                                                                         | obstetrics and gynecology | No                   |
| CD011693.PUB3 | Ab interno trabecular bypass surgery with Trabectome for open-angle glaucoma                                                               | ophthalmology             | No                   |
| CD008669.PUB3 | Tonsillectomy for periodic fever, aphthous stomatitis, pharyngitis and cervical adenitis syndrome (PFAPA)                                  | otolaryngology            | No                   |
| CD008128.PUB2 | Treatment of valvular heart disease during pregnancy for improving maternal and neonatal outcome                                           | cardiac surgery           | No                   |
| CD001923.PUB2 | Carotid endarterectomy for asymptomatic carotid stenosis                                                                                   | vascular surgery          | Yes                  |
| CD010960.PUB2 | Injection therapies for Achilles tendinopathy                                                                                              | orthopaedic surgery       | No                   |
| CD003738.PUB3 | Interventions for preventing posterior capsule opacification                                                                               | ophthalmology             | No                   |
| CD013000.PUB2 | Interventions for orbital lymphangioma                                                                                                     | otolaryngology            | No                   |
| CD008282      | Adenoidectomy for recurrent or chronic nasal symptoms in children                                                                          | otolaryngology            | No                   |
| CD003263.PUB5 | Interventions for vitiligo                                                                                                                 | dermatology               | No                   |
| CD008583.PUB3 | Ultrasound-guided transvaginal ovarian needle drilling for clomiphene-resistant polycystic ovarian syndrome in subfertile women            | obstetrics and gynecology | No                   |
| CD007810.PUB2 | Adenoidectomy for otitis media in children                                                                                                 | otolaryngology            | No                   |
| CD006181.PUB2 | Prophylactic surgical ligation of patent ductus arteriosus for prevention of mortality and morbidity in extremely low birth weight infants | cardiac surgery           | No                   |
| CD011917.PUB2 | Surgery for limited-stage small-cell lung cancer                                                                                           | thoracic surgery          | No                   |
| CD010264.PUB2 | Surgical versus non-surgical treatment for lumbar spinal stenosis                                                                          | orthopaedic surgery       | Yes                  |
| CD008732.PUB2 | Macular grid laser photocoagulation for branch retinal vein occlusion                                                                      | ophthalmology             | No                   |
| CD011680.PUB2 | Interventions for necrotizing soft tissue infections in adults                                                                             | general surgery           | No                   |
| CD001801.PUB3 | Grommets (ventilation tubes) for hearing loss associated with otitis media with effusion in children                                       | otolaryngology            | No                   |
| CD006205.PUB4 | Interventions for the treatment of oral and oropharyngeal cancers: surgical treatment                                                      | otolaryngology            | No                   |
| CD009245.PUB3 | Interventions for the treatment of Paget's disease of the vulva                                                                            | obstetrics and gynecology | No                   |
| CD012798.PUB3 | Interventions for treating distal intestinal obstruction syndrome (DIOS) in cystic fibrosis                                                | general surgery           | No                   |
| CD008089.PUB2 | Surgery for shoulder osteoarthritis                                                                                                        | orthopaedic surgery       | No                   |
| CD008497.PUB3 | Deep brain and cortical stimulation for epilepsy                                                                                           | neurosurgery              | No                   |
| CD004325.PUB2 | Surgical versus non-surgical treatment for acute anterior shoulder dislocation                                                             | orthopaedic surgery       | No                   |
| CD005048.PUB4 | Interventions for dysphagia in oesophageal cancer                                                                                          | general surgery           | No                   |
| CD000200.PUB2 | Surgery for primary supratentorial intracerebral haemorrhage                                                                               | neurosurgery              | Yes                  |
| CD011031.PUB3 | Laparoscopic surgery for endometriosis                                                                                                     | obstetrics and gynecology | No                   |
| CD010796.PUB2 | Surgery for treating hip impingement (femoroacetabular impingement)                                                                        | orthopaedic surgery       | No                   |
| CD006769.PUB2 | Interventions for late trabeculectomy bleb leak                                                                                            | ophthalmology             | No                   |
| CD001532.PUB5 | Interventions for primary vesicoureteric reflux                                                                                            | urology                   | Yes                  |
| CD008104.PUB2 | Interventions for treating osteochondral defects of the talus in adults                                                                    | orthopaedic surgery       | No                   |
| CD001552.PUB2 | Surgical versus non-surgical treatment for carpal tunnel syndrome                                                                          | orthopaedic surgery       | Yes                  |

**Supplementary Figures and Tables**

Supplementary table 1. Reviews per specialty

| <b>Specialty</b>          | <b>Total reviews</b> | <b>Reviews with at least one comparison (%)</b> |
|---------------------------|----------------------|-------------------------------------------------|
| Cardiac surgery           | 6                    | 2 (33)                                          |
| Dermatology               | 5                    | 1 (20)                                          |
| General surgery           | 35                   | 5 (14)                                          |
| Neurosurgery              | 12                   | 5 (42)                                          |
| Obstetrics and gynecology | 31                   | 8 (26)                                          |
| Ophthalmology             | 25                   | 5 (20)                                          |
| Orthopaedic surgery       | 23                   | 6 (26)                                          |
| Otolaryngology            | 23                   | 3 (13)                                          |
| Thoracic surgery          | 9                    | 1 (11)                                          |
| Urology                   | 7                    | 1 (14)                                          |
| Vascular surgery          | 12                   | 4 (33)                                          |

Supplementary Table 2. Inconclusive comparisons between surgery and drugs

| Surgical arm                            | Drug arm                                   | Disease                  | Outcome                                                            | Treatment effect (95% CI) | GRADE assessment |
|-----------------------------------------|--------------------------------------------|--------------------------|--------------------------------------------------------------------|---------------------------|------------------|
| Cardiac surgery                         |                                            |                          |                                                                    |                           |                  |
| Transmyocardial laser revascularization | Continued medication                       | Refractory angina        | Overall mortality                                                  | OR=1.12 (0.77-1.63)       | High             |
|                                         |                                            |                          | Postoperative mortality (30 d)                                     | OR=1.19 (0.63-2.24)       | High             |
| Surgical closure                        | IV indomethacin                            | Patent ductus arteriosus | Death before discharge                                             | RR=0.67 (0.34-1.31)       |                  |
| Dermatology                             |                                            |                          |                                                                    |                           |                  |
| Surgical excision                       | Imiquimod                                  | BCC                      | Patient-rated good/excellent cosmetic outcome                      | RR=1 (0.94-1.06)          | Low              |
| General surgery                         |                                            |                          |                                                                    |                           |                  |
| Surgery                                 | Tamoxifen                                  | Primary breast cancer    | Overall survival                                                   | HR=0.98 (0.81-1.2)        | Low              |
| Laparoscopic fundoplication             | Protein pump inhibitors                    | GERD                     | Health-related quality of life (<1 y)                              | SMD=0.14 (-0.02-0.3)+     | Very Low         |
|                                         |                                            |                          | Health-related QOL (1-5 y)                                         | SMD=0.03 (-0.19-0.24)+    | Very Low         |
|                                         |                                            |                          | GORD-specific quality of life (1-5 y)                              | SMD=0.28 (-0.27-0.84)+    | Very Low         |
| Oesophagectomy                          | Chemoradiotherapy and/or radiotherapy      | Oesophageal cancer       | Short-term mortality                                               | RR=0.39 (0.11-1.35)       | Very Low         |
|                                         |                                            |                          | Long-term mortality                                                | RR=1.03 (0.92-1.14)       | Low              |
|                                         |                                            |                          | Medium-term health-related QOL                                     | MD=-0.95 (-2.1-0.2)       | Very Low         |
| Neurosurgery                            |                                            |                          |                                                                    |                           |                  |
| Decompressive surgery                   | Prednisolone                               | Leprosy                  | Change in sensory score after one year                             | MD=0.08 (-2.45-2.61)      | Very Low         |
|                                         |                                            |                          | Proportion of ulnar nerves with sensory improvement after one year | RR=1.13 (0.71-1.77)       | Very Low         |
|                                         |                                            |                          | Change in motor score after one year                               | MD=0.82 (-1.34-2.98)      | Very Low         |
|                                         |                                            |                          | Proportion of ulnar nerves with motor improvement after one year   | RR=0.91 (0.64-1.28)       | Very Low         |
| Decompressive craniectomy               | Medical treatment (including barbiturates) | High ICP in closed TBI   | Neurological unfavourable outcome 6 mo                             | RR=1 (0.71-1.4)           | Low              |
|                                         |                                            |                          | Mortality 6 mo                                                     | RR=0.66 (0.43-1.01)       | Moderate         |
| Obstetrics and gynaecology              |                                            |                          |                                                                    |                           |                  |
| Suction aspiration                      | Vaginal or oral misoprostol                | Abortion                 | Death or serious complication                                      | RR=1 (0.04-25)            |                  |



| Surgical arm                                                        | Drug arm                                                  | Disease                  | Outcome                                                           | Treatment effect (95% CI) | GRADE assessment |
|---------------------------------------------------------------------|-----------------------------------------------------------|--------------------------|-------------------------------------------------------------------|---------------------------|------------------|
| Suction aspiration                                                  | Misoprostol                                               | Abortion                 | Composite outcome of death or serious complication                | RR=1.53 (0.45-5.16)       | Very Low         |
| Suction aspiration                                                  | Misoprostol and mifepristone                              | Abortion                 | Complete miscarriage                                              | RR=1.29 (0.96-1.73)       | Very Low         |
| Suction aspiration                                                  | Vaginal suppositories or im inj. of 9-methylene-PGE2      | Abortion                 | Composite outcome of death or serious complication                | RR=0.14 (0.01-2.74)       | Very Low         |
|                                                                     |                                                           |                          | Abortion not completed with intended method                       | OR=0.62 (0.02-16.6)       |                  |
|                                                                     |                                                           |                          | Ongoing pregnancy                                                 | OR=1.82 (0.54-6.25)       |                  |
|                                                                     |                                                           |                          | Pelvic infection                                                  | OR=0.46 (0.14-1.56)       |                  |
| Dilatation and curettage                                            | Misoprostol                                               | Abortion                 | Composite outcome of death or serious complication                | RR=0.79 (0.34-1.85)       | Very Low         |
| Laparoscopic ovarian drilling                                       | Metformin, Clomiphene                                     | PCOS                     | Menstrual regularity at 6 mo.                                     | OR=1.02 (0.64-1.64)       | Very Low         |
| Laparoscopic ovarian drilling                                       | Letrozele                                                 | PCOS                     | Menstrual regularity at 6 mo.                                     | OR=1.08 (0.64-1.84)       | Very Low         |
| Laparoscopic ovarian drilling                                       | Metformin, Letrozol                                       | PCOS                     | Menstrual regularity at 6 mo.                                     | OR=0.95 (0.49-1.81)       | Very Low         |
| Laparoscopic ovarian drilling                                       | Metformin                                                 | PCOS                     | Menstrual regularity at 6 mo.                                     | OR=1.51 (0.62-3.71)       | Moderate         |
| Laparoscopic ovarian drilling                                       | Gonadotropins                                             | PCOS                     | Improvement in androgenic symptoms 6 mo.                          | OR=3.02 (0.56-16.33)      | Low              |
| Laparoscopic ovarian drilling                                       | Metformin                                                 | PCOS                     | Improvement in androgenic symptoms 6 mo.                          | OR=1 (0.42-2.37)          | Low              |
| Laparoscopic ovarian drilling                                       | Letrozele                                                 | Infertility due to PCOS  | Live birth                                                        | RR=0.72 (0.5-1.05)        | Moderate         |
|                                                                     |                                                           |                          | Rate of ovarian hyperstimulation syndrome                         | RD=0 (-0.01-0.01)         | High             |
| Transcervical resection of endometrium using rollerball coagulation | Hormone therapy or antifibrinolytic                       | Heavy menstrual bleeding | Control of bleeding (cure or improvement to acceptable level) 5 y | RR=1.14 (0.97-1.34)       | Very Low         |
|                                                                     |                                                           |                          | Overall satisfaction with treatment 5 y                           | RR=1.13 (0.94-1.37)       | Very Low         |
| Ophthalmology                                                       |                                                           |                          |                                                                   |                           |                  |
| Amniotic membrane transplantation and medication                    | Lubrication, Antibiotics and Pressure lowering medication | Acute ocular burns       | Epithelial defect 21 d post-injury                                | RR=0.71 (0.27-1.85)       | Low              |
| Argon laser trabeculoplasty                                         | IOP reducing medication                                   | Open angle glaucoma      | Visual field progression                                          | RR=0.7 (0.42-1.16)        |                  |
|                                                                     |                                                           |                          | Optic neuropathy progression                                      | RR=0.71 (0.38-1.34)       |                  |
| Laser surgery                                                       | intravitreal anti-VEGF                                    | Pathological myopia      | Proportion of participants with a                                 | RR=0.32 (0.08-1.33)       | Low              |

| Surgical arm                         | Drug arm                                                                | Disease                             | Outcome                                                                                                                                               | Treatment effect (95% CI)   | GRADE assessment |
|--------------------------------------|-------------------------------------------------------------------------|-------------------------------------|-------------------------------------------------------------------------------------------------------------------------------------------------------|-----------------------------|------------------|
| Surgical correction                  | Botulinum toxin                                                         | Strabismus                          | gain of 3+ lines in BCVA at 1 y<br>Improved ocular alignment > 10 dioptres, children                                                                  | RR=1.1 (0.86-1.41)          | Low              |
| Orthopaedic surgery                  |                                                                         |                                     |                                                                                                                                                       |                             |                  |
| Arthroscopic surgery                 | Sclerosing injection                                                    | Jumper's knee                       | Withdrawal rate                                                                                                                                       | OR=1 (0.06-16.89)           | Very Low         |
| Open surgery                         | Corticosteroid injection                                                | Trigger finger                      | Resolution of triggering                                                                                                                              | RR=1.48 (0.79-2.76)         | Very low         |
| Open section of the carpal ligament  | NSAID and splinting or corticosteroid injections                        | Carpal tunnel syndrome              | Improvement in clinical symptoms at three months of follow-up                                                                                         | RR=1.09 (0.91-1.32)         |                  |
| Surgical rotator cuff repair         | Non-operative treatment including corticosteroid injection and exercise | Rotator cuff tear                   | Pain (VAS) 12 mo                                                                                                                                      | MD=-0.49 (-1.02-0.05)       | Moderate         |
| Otolaryngology                       |                                                                         |                                     |                                                                                                                                                       |                             |                  |
| Surgical orbital decompression       | IV Methylprednisolone 1x3 followed by oral prednisolone                 | Thyroid eye disease                 | Proportion of successes compared to the proportion of treatment failures as defined by the study authors based on the use of composite outcome scores | RR=0.16 (0.01-1.98)         |                  |
| Open thoracotomy                     | Thoracostomy drainage (with fibrinolytics)                              | Thoracic surgery<br>Pleural empyema | Mortality                                                                                                                                             | RR=NA (NA-NA)               | Moderate         |
| VATS                                 | Thoracostomy drainage (with fibrinolytics)                              | Pleural empyema                     | Mortality                                                                                                                                             | RR=0.8 (0.04-14.89)         | Low              |
| Urology                              |                                                                         |                                     |                                                                                                                                                       |                             |                  |
| Surgical reimplantation of ureters   | Antibiotics                                                             | Primary vesicoureteric reflux       | Rate of patients with symptomatic UTI                                                                                                                 | RR=0.95 (0.67-1.35)         |                  |
| Vascular surgery                     |                                                                         |                                     |                                                                                                                                                       |                             |                  |
| Surgery including primary amputation | Thrombolysis (w/ rt-Pa or urokinase)                                    | Acute limb ischaemia                | Limb salvage (30 d)                                                                                                                                   | OR=0.89 (0.27-2.91)         | Low              |
| Saphenofemoral disconnection         | Therapeutic LMWH                                                        | Superficial thrombophlebitis        | Symptomatic VTE                                                                                                                                       | RR=5 (0.25-100)             |                  |
| Aspirin and carotid surgery          | Aspirin                                                                 | Carotid stenosis                    | Major bleeding<br>Ipsilateral ischaemic stroke, and any operative stroke or death near occlusion                                                      | RR=NA<br>RR=0.89 (0.6-1.32) | Moderate         |

### Abbreviations

RR: risk ratio

OR: odds ratio  
HR: hazard ratio  
MD: mean difference  
SMD: standardized mean difference

BCC: basal cell carcinoma of the skin  
GERD: Gastro-oesophageal reflux disease  
GTN: glyceryl tri-nitrate  
IOP: intra-ocular pressure  
PCOS: polycystic ovarian syndrome  
QOL: Quality of life
